# Supplementary material for: Discovering Common miRNA Signatures Underlying Female-Specific Cancers via a Machine Learning Approach Driven by the Cancer Hallmark ERBB
Source: MDPI journal article supplement (doi:10.3390/biomedicines10061306), 2022-06-02
Supplement: s1 [file s1]

## Supplementary Materials

Figure S1

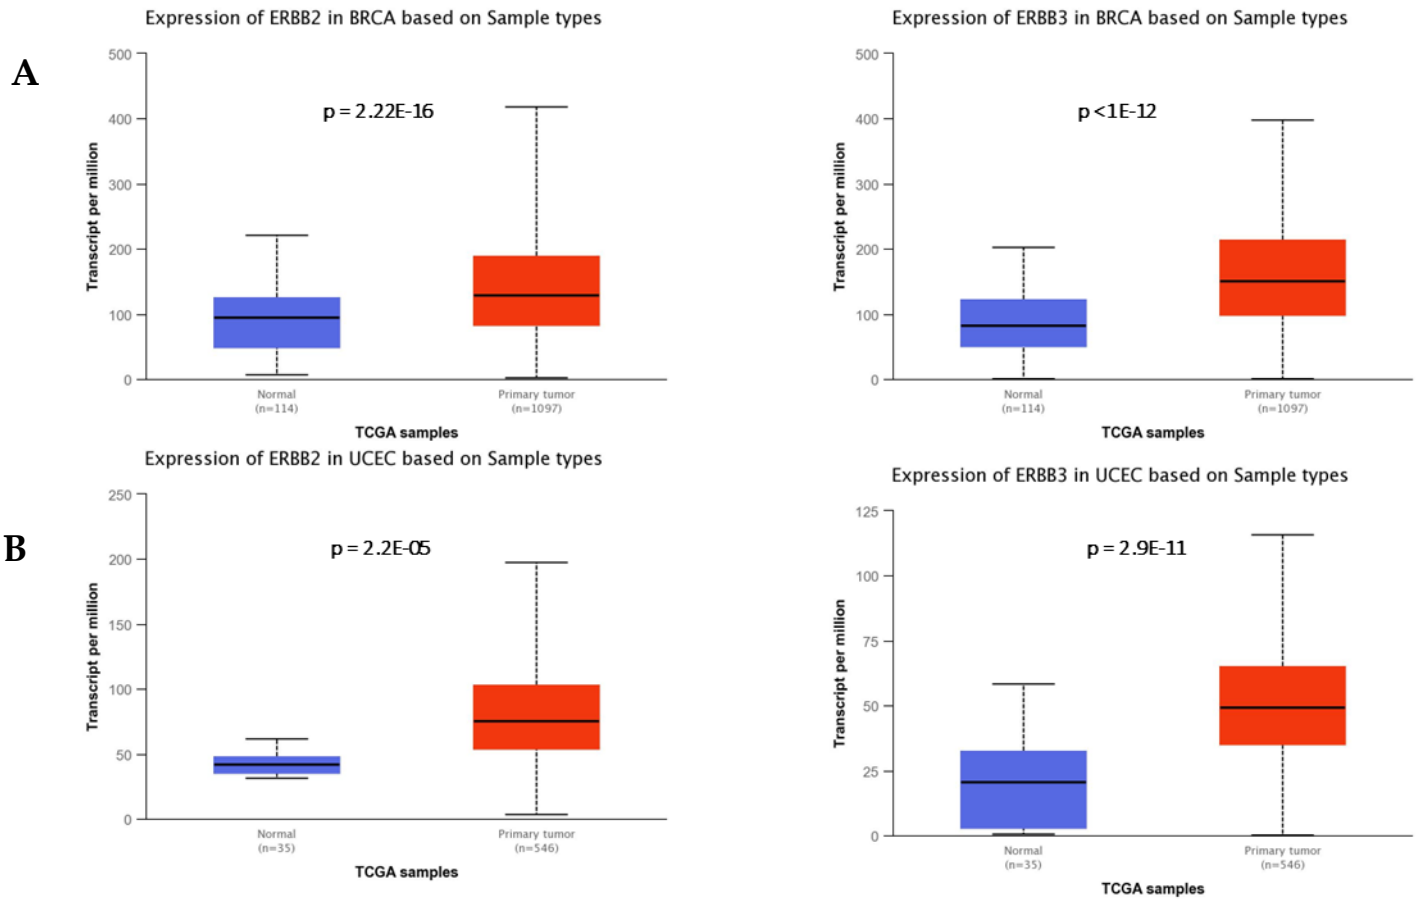

**Figure S1. Expression profile of ERBB2 and ERBB3 in breast cancer (TCGA-BRCA) and uterine corpus endometrial carcinoma (TCGA-UCEC), and normal samples (RNA-seq, transcript per million).** A) ERBB2 and ERBB3 expression in TCGA-BRCA dataset (on the left and on the right, respectively) by comparing N. 114 solid tissue normal vs N. 1091 breast invasive carcinoma. B) ERBB2 and ERBB3 expression in TCGA-UCEC dataset (on the left and on the right, respectively) by comparing N. 35 solid tissue normal vs N. 546 primary tumor samples. Statistical significance in each box plot (normal vs primary) two sample T-test  $< 0.01$ .

Figure S2

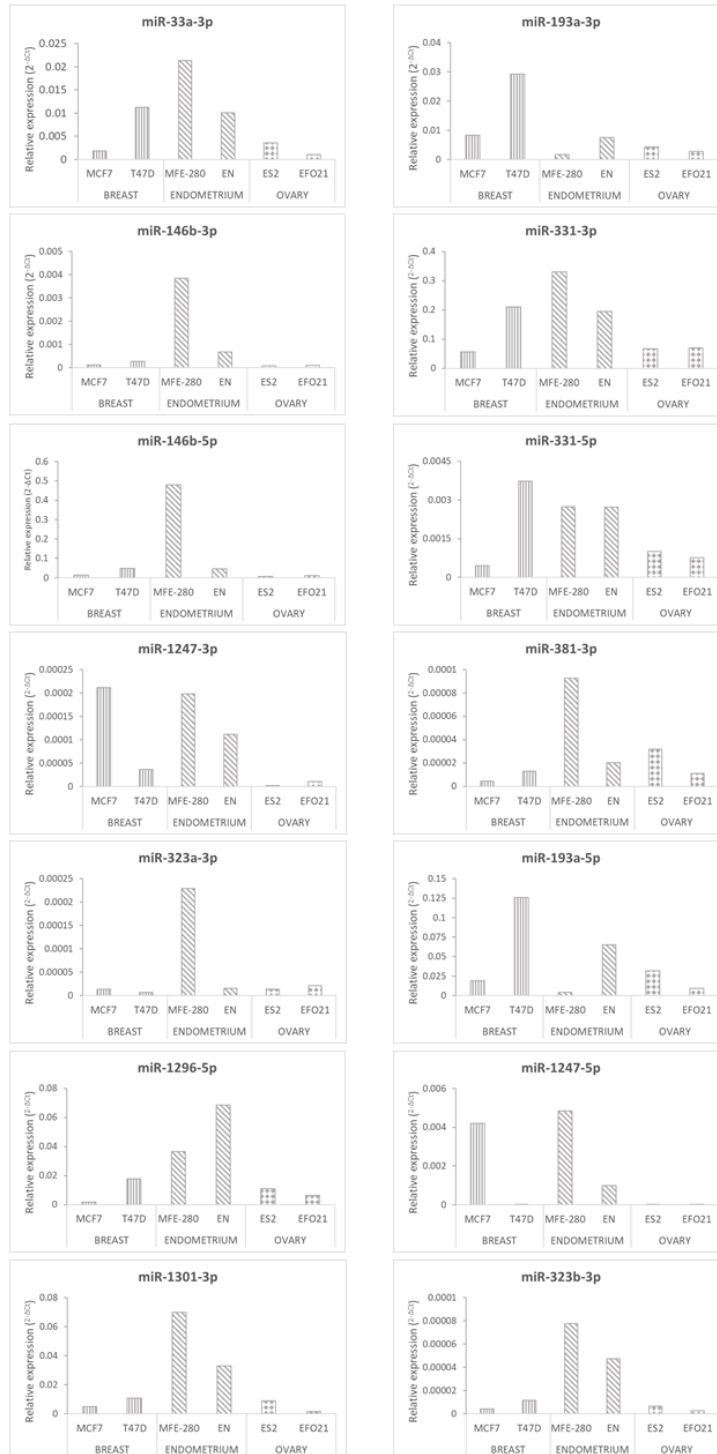

**Figure S2. Relative expression of the 14 selected miRNAs in cancer cell lines.** Each graph shows the expression level of miRNAs in all evaluated cancer cell lines (breast: MCF7, T47D; endometrium: MFE-280, EN; and ovary: ES2, EFO21). The relative expression of miRNAs is expressed here as 2<sup>-ΔCt</sup>.

**Table S1:** TCGA dataset barcodes

| <b>Project</b> | <b>Sample Type</b> | <b>barcode</b>               | <b>TCGA_patient_barcode</b> |
|----------------|--------------------|------------------------------|-----------------------------|
| TCGA-OV        | Primary Tumor      | TCGA-04-1331-01A-01R-1569-13 | TCGA-04-1331                |
| TCGA-OV        | Primary Tumor      | TCGA-04-1332-01A-01R-1564-13 | TCGA-04-1332                |
| TCGA-OV        | Primary Tumor      | TCGA-04-1336-01A-01R-1564-13 | TCGA-04-1336                |
| TCGA-OV        | Primary Tumor      | TCGA-04-1337-01A-01R-1564-13 | TCGA-04-1337                |
| TCGA-OV        | Primary Tumor      | TCGA-04-1341-01A-01R-1564-13 | TCGA-04-1341                |
| TCGA-OV        | Primary Tumor      | TCGA-04-1342-01A-01R-1564-13 | TCGA-04-1342                |
| TCGA-OV        | Primary Tumor      | TCGA-04-1343-01A-01R-1564-13 | TCGA-04-1343                |
| TCGA-OV        | Primary Tumor      | TCGA-04-1346-01A-01R-1569-13 | TCGA-04-1346                |
| TCGA-OV        | Primary Tumor      | TCGA-04-1347-01A-01R-1564-13 | TCGA-04-1347                |
| TCGA-OV        | Primary Tumor      | TCGA-04-1348-01A-01R-1565-13 | TCGA-04-1348                |
| TCGA-OV        | Primary Tumor      | TCGA-04-1349-01A-01R-1565-13 | TCGA-04-1349                |
| TCGA-OV        | Primary Tumor      | TCGA-04-1350-01A-01R-1565-13 | TCGA-04-1350                |
| TCGA-OV        | Primary Tumor      | TCGA-04-1356-01A-01R-1569-13 | TCGA-04-1356                |
| TCGA-OV        | Primary Tumor      | TCGA-04-1357-01A-01R-1565-13 | TCGA-04-1357                |
| TCGA-OV        | Primary Tumor      | TCGA-04-1361-01A-01R-1565-13 | TCGA-04-1361                |
| TCGA-OV        | Primary Tumor      | TCGA-04-1362-01A-01R-1565-13 | TCGA-04-1362                |
| TCGA-OV        | Primary Tumor      | TCGA-04-1364-01A-01R-1565-13 | TCGA-04-1364                |
| TCGA-OV        | Primary Tumor      | TCGA-04-1365-01A-01R-1565-13 | TCGA-04-1365                |
| TCGA-OV        | Primary Tumor      | TCGA-04-1367-01A-01R-1565-13 | TCGA-04-1367                |
| TCGA-OV        | Primary Tumor      | TCGA-04-1514-01A-01R-1566-13 | TCGA-04-1514                |
| TCGA-OV        | Primary Tumor      | TCGA-04-1517-01A-01R-1565-13 | TCGA-04-1517                |
| TCGA-OV        | Primary Tumor      | TCGA-04-1519-01A-01R-1565-13 | TCGA-04-1519                |
| TCGA-OV        | Primary Tumor      | TCGA-04-1525-01A-01R-1565-13 | TCGA-04-1525                |
| TCGA-OV        | Primary Tumor      | TCGA-04-1530-01A-02R-1569-13 | TCGA-04-1530                |
| TCGA-OV        | Primary Tumor      | TCGA-04-1536-01A-01R-1566-13 | TCGA-04-1536                |
| TCGA-OV        | Primary Tumor      | TCGA-04-1542-01A-01R-1566-13 | TCGA-04-1542                |
| TCGA-OV        | Primary Tumor      | TCGA-04-1638-01A-01R-1567-13 | TCGA-04-1638                |
| TCGA-OV        | Primary Tumor      | TCGA-04-1646-01A-01R-1567-13 | TCGA-04-1646                |
| TCGA-OV        | Primary Tumor      | TCGA-04-1648-01A-01R-1567-13 | TCGA-04-1648                |
| TCGA-OV        | Primary Tumor      | TCGA-04-1649-01A-01R-1567-13 | TCGA-04-1649                |
| TCGA-OV        | Primary Tumor      | TCGA-04-1651-01A-01R-1567-13 | TCGA-04-1651                |
| TCGA-OV        | Primary Tumor      | TCGA-04-1652-01A-01R-1567-13 | TCGA-04-1652                |
| TCGA-OV        | Primary Tumor      | TCGA-04-1654-01A-02R-1567-13 | TCGA-04-1654                |
| TCGA-OV        | Primary Tumor      | TCGA-04-1655-01A-01R-1566-13 | TCGA-04-1655                |
| TCGA-OV        | Primary Tumor      | TCGA-09-0364-01A-02R-1564-13 | TCGA-09-0364                |
| TCGA-OV        | Primary Tumor      | TCGA-09-0366-01A-01R-1564-13 | TCGA-09-0366                |
| TCGA-OV        | Primary Tumor      | TCGA-09-0366-01A-01R-1986-13 | TCGA-09-0366                |
| TCGA-OV        | Primary Tumor      | TCGA-09-0367-01A-01R-1564-13 | TCGA-09-0367                |
| TCGA-OV        | Primary Tumor      | TCGA-09-1661-01B-01R-1566-13 | TCGA-09-1661                |
| TCGA-OV        | Primary Tumor      | TCGA-09-1662-01A-01R-1566-13 | TCGA-09-1662                |
| TCGA-OV        | Primary Tumor      | TCGA-09-1665-01B-01R-1566-13 | TCGA-09-1665                |
| TCGA-OV        | Primary Tumor      | TCGA-09-1666-01A-01R-1566-13 | TCGA-09-1666                |
| TCGA-OV        | Primary Tumor      | TCGA-09-1667-01C-01R-1566-13 | TCGA-09-1667                |
| TCGA-OV        | Primary Tumor      | TCGA-09-1668-01B-01R-1566-13 | TCGA-09-1668                |
| TCGA-OV        | Primary Tumor      | TCGA-09-1669-01A-01R-1566-13 | TCGA-09-1669                |
| TCGA-OV        | Primary Tumor      | TCGA-09-1670-01A-01R-1566-13 | TCGA-09-1670                |
| TCGA-OV        | Primary Tumor      | TCGA-09-1673-01A-01R-1566-13 | TCGA-09-1673                |
| TCGA-OV        | Primary Tumor      | TCGA-09-1674-01A-01R-1566-13 | TCGA-09-1674                |
| TCGA-OV        | Primary Tumor      | TCGA-09-2044-01B-01R-1568-13 | TCGA-09-2044                |
| TCGA-OV        | Primary Tumor      | TCGA-09-2045-01A-01R-1568-13 | TCGA-09-2045                |
| TCGA-OV        | Primary Tumor      | TCGA-09-2048-01A-01R-1568-13 | TCGA-09-2048                |
| TCGA-OV        | Primary Tumor      | TCGA-09-2050-01A-01R-1568-13 | TCGA-09-2050                |
| TCGA-OV        | Primary Tumor      | TCGA-09-2051-01A-01R-1568-13 | TCGA-09-2051                |
| TCGA-OV        | Primary Tumor      | TCGA-09-2053-01C-01R-1568-13 | TCGA-09-2053                |
| TCGA-OV        | Primary Tumor      | TCGA-09-2054-01A-01R-1568-13 | TCGA-09-2054                |
| TCGA-OV        | Primary Tumor      | TCGA-09-2056-01B-01R-1568-13 | TCGA-09-2056                |
| TCGA-OV        | Primary Tumor      | TCGA-10-0926-01A-01R-1564-13 | TCGA-10-0926                |

[illegible]

[illegible]

[illegible]

[illegible]

[illegible]



[illegible]

|         |               |                              |              |
|---------|---------------|------------------------------|--------------|
| TCGA-OV | Primary Tumor | TCGA-36-1571-01A-01R-1566-13 | TCGA-36-1571 |
| TCGA-OV | Primary Tumor | TCGA-36-1574-01A-01R-1566-13 | TCGA-36-1574 |
| TCGA-OV | Primary Tumor | TCGA-36-1575-01A-01R-1566-13 | TCGA-36-1575 |
| TCGA-OV | Primary Tumor | TCGA-36-1576-01A-01R-1566-13 | TCGA-36-1576 |
| TCGA-OV | Primary Tumor | TCGA-36-1577-01A-01R-1566-13 | TCGA-36-1577 |
| TCGA-OV | Primary Tumor | TCGA-36-1578-01A-01R-1566-13 | TCGA-36-1578 |
| TCGA-OV | Primary Tumor | TCGA-36-1580-01A-01R-1566-13 | TCGA-36-1580 |
| TCGA-OV | Primary Tumor | TCGA-36-1581-01A-01R-1566-13 | TCGA-36-1581 |
| TCGA-OV | Primary Tumor | TCGA-3P-A9WA-01A-11R-A407-13 | TCGA-3P-A9WA |
| TCGA-OV | Primary Tumor | TCGA-57-1582-01A-01R-1566-13 | TCGA-57-1582 |
| TCGA-OV | Primary Tumor | TCGA-57-1583-01A-01R-1566-13 | TCGA-57-1583 |
| TCGA-OV | Primary Tumor | TCGA-57-1584-01A-01R-1566-13 | TCGA-57-1584 |
| TCGA-OV | Primary Tumor | TCGA-57-1585-01A-01R-1566-13 | TCGA-57-1585 |
| TCGA-OV | Primary Tumor | TCGA-57-1586-01A-02R-1567-13 | TCGA-57-1586 |
| TCGA-OV | Primary Tumor | TCGA-57-1993-01A-01R-1568-13 | TCGA-57-1993 |
| TCGA-OV | Primary Tumor | TCGA-57-1994-01A-01R-1568-13 | TCGA-57-1994 |
| TCGA-OV | Primary Tumor | TCGA-59-2348-01A-01R-1569-13 | TCGA-59-2348 |
| TCGA-OV | Primary Tumor | TCGA-59-2350-01A-01R-1569-13 | TCGA-59-2350 |
| TCGA-OV | Primary Tumor | TCGA-59-2351-01A-01R-1569-13 | TCGA-59-2351 |
| TCGA-OV | Primary Tumor | TCGA-59-2352-01A-01R-1569-13 | TCGA-59-2352 |
| TCGA-OV | Primary Tumor | TCGA-59-2354-01A-01R-1569-13 | TCGA-59-2354 |
| TCGA-OV | Primary Tumor | TCGA-59-2355-01A-01R-1569-13 | TCGA-59-2355 |
| TCGA-OV | Primary Tumor | TCGA-59-2363-01A-01R-1569-13 | TCGA-59-2363 |
| TCGA-OV | Primary Tumor | TCGA-59-A5PD-01A-11R-A407-13 | TCGA-59-A5PD |
| TCGA-OV | Primary Tumor | TCGA-5X-AA5U-01A-11R-A407-13 | TCGA-5X-AA5U |
| TCGA-OV | Primary Tumor | TCGA-61-1721-01A-01R-1569-13 | TCGA-61-1721 |
| TCGA-OV | Primary Tumor | TCGA-61-1724-01A-01R-1568-13 | TCGA-61-1724 |
| TCGA-OV | Primary Tumor | TCGA-61-1725-01A-01R-1567-13 | TCGA-61-1725 |
| TCGA-OV | Primary Tumor | TCGA-61-1728-01A-01R-1568-13 | TCGA-61-1728 |
| TCGA-OV | Primary Tumor | TCGA-61-1733-01A-01R-1567-13 | TCGA-61-1733 |
| TCGA-OV | Primary Tumor | TCGA-61-1736-01B-01R-1568-13 | TCGA-61-1736 |
| TCGA-OV | Primary Tumor | TCGA-61-1737-01A-01R-1567-13 | TCGA-61-1737 |
| TCGA-OV | Primary Tumor | TCGA-61-1738-01A-01R-1567-13 | TCGA-61-1738 |
| TCGA-OV | Primary Tumor | TCGA-61-1740-01A-01R-1567-13 | TCGA-61-1740 |
| TCGA-OV | Primary Tumor | TCGA-61-1741-01A-02R-1567-13 | TCGA-61-1741 |
| TCGA-OV | Primary Tumor | TCGA-61-1743-01A-01R-1568-13 | TCGA-61-1743 |
| TCGA-OV | Primary Tumor | TCGA-61-1895-01A-01R-1567-13 | TCGA-61-1895 |
| TCGA-OV | Primary Tumor | TCGA-61-1899-01A-01R-1567-13 | TCGA-61-1899 |
| TCGA-OV | Primary Tumor | TCGA-61-1900-01A-01R-1567-13 | TCGA-61-1900 |
| TCGA-OV | Primary Tumor | TCGA-61-1901-01A-01R-1567-13 | TCGA-61-1901 |
| TCGA-OV | Primary Tumor | TCGA-61-1906-01A-01R-1567-13 | TCGA-61-1906 |
| TCGA-OV | Primary Tumor | TCGA-61-1907-01A-01R-1567-13 | TCGA-61-1907 |
| TCGA-OV | Primary Tumor | TCGA-61-1910-01A-01R-1567-13 | TCGA-61-1910 |
| TCGA-OV | Primary Tumor | TCGA-61-1911-01A-01R-1567-13 | TCGA-61-1911 |
| TCGA-OV | Primary Tumor | TCGA-61-1913-01A-01R-1567-13 | TCGA-61-1913 |
| TCGA-OV | Primary Tumor | TCGA-61-1914-01A-01R-1567-13 | TCGA-61-1914 |
| TCGA-OV | Primary Tumor | TCGA-61-1915-01A-01R-1567-13 | TCGA-61-1915 |
| TCGA-OV | Primary Tumor | TCGA-61-1917-01A-01R-1568-13 | TCGA-61-1917 |
| TCGA-OV | Primary Tumor | TCGA-61-1918-01A-01R-1568-13 | TCGA-61-1918 |
| TCGA-OV | Primary Tumor | TCGA-61-1919-01A-01R-1568-13 | TCGA-61-1919 |
| TCGA-OV | Primary Tumor | TCGA-61-1995-01A-01R-1568-13 | TCGA-61-1995 |
| TCGA-OV | Primary Tumor | TCGA-61-1998-01A-01R-1568-13 | TCGA-61-1998 |
| TCGA-OV | Primary Tumor | TCGA-61-2000-01A-01R-1568-13 | TCGA-61-2000 |
| TCGA-OV | Primary Tumor | TCGA-61-2002-01A-01R-1568-13 | TCGA-61-2002 |
| TCGA-OV | Primary Tumor | TCGA-61-2003-01A-01R-1568-13 | TCGA-61-2003 |
| TCGA-OV | Primary Tumor | TCGA-61-2008-01A-02R-1568-13 | TCGA-61-2008 |
| TCGA-OV | Primary Tumor | TCGA-61-2009-01A-01R-1568-13 | TCGA-61-2009 |
| TCGA-OV | Primary Tumor | TCGA-61-2012-01A-01R-1568-13 | TCGA-61-2012 |
| TCGA-OV | Primary Tumor | TCGA-61-2016-01A-01R-1568-13 | TCGA-61-2016 |

|           |               |                              |              |
|-----------|---------------|------------------------------|--------------|
| TCGA-OV   | Primary Tumor | TCGA-61-2088-01A-01R-1568-13 | TCGA-61-2088 |
| TCGA-OV   | Primary Tumor | TCGA-61-2092-01A-01R-1568-13 | TCGA-61-2092 |
| TCGA-OV   | Primary Tumor | TCGA-61-2094-01A-01R-1568-13 | TCGA-61-2094 |
| TCGA-OV   | Primary Tumor | TCGA-61-2095-01A-01R-1568-13 | TCGA-61-2095 |
| TCGA-OV   | Primary Tumor | TCGA-61-2097-01A-02R-1568-13 | TCGA-61-2097 |
| TCGA-OV   | Primary Tumor | TCGA-61-2098-01A-01R-1568-13 | TCGA-61-2098 |
| TCGA-OV   | Primary Tumor | TCGA-61-2101-01A-01R-1568-13 | TCGA-61-2101 |
| TCGA-OV   | Primary Tumor | TCGA-61-2102-01A-01R-1568-13 | TCGA-61-2102 |
| TCGA-OV   | Primary Tumor | TCGA-61-2104-01A-01R-1568-13 | TCGA-61-2104 |
| TCGA-OV   | Primary Tumor | TCGA-61-2109-01A-01R-1568-13 | TCGA-61-2109 |
| TCGA-OV   | Primary Tumor | TCGA-61-2110-01A-01R-1568-13 | TCGA-61-2110 |
| TCGA-OV   | Primary Tumor | TCGA-61-2111-01A-01R-1568-13 | TCGA-61-2111 |
| TCGA-OV   | Primary Tumor | TCGA-61-2113-01A-01R-1568-13 | TCGA-61-2113 |
| TCGA-OV   | Primary Tumor | TCGA-72-4232-01A-01R-1013-13 | TCGA-72-4232 |
| TCGA-OV   | Primary Tumor | TCGA-72-4236-01A-01R-1013-13 | TCGA-72-4236 |
| TCGA-OV   | Primary Tumor | TCGA-72-4237-01A-01R-1013-13 | TCGA-72-4237 |
| TCGA-OV   | Primary Tumor | TCGA-OY-A56P-01A-12R-A407-13 | TCGA-OY-A56P |
| TCGA-OV   | Primary Tumor | TCGA-OY-A56Q-01A-11R-A407-13 | TCGA-OY-A56Q |
| TCGA-OV   | Primary Tumor | TCGA-VG-A8LO-01A-11R-A407-13 | TCGA-VG-A8LO |
| TCGA-OV   | Primary Tumor | TCGA-WR-A838-01A-12R-A407-13 | TCGA-WR-A838 |
| TCGA-BRCA | Primary Tumor | TCGA-3C-AAAU-01A-11R-A41G-13 | TCGA-3C-AAAU |
| TCGA-BRCA | Primary Tumor | TCGA-3C-AALI-01A-11R-A41G-13 | TCGA-3C-AALI |
| TCGA-BRCA | Primary Tumor | TCGA-3C-AALJ-01A-31R-A41G-13 | TCGA-3C-AALJ |
| TCGA-BRCA | Primary Tumor | TCGA-3C-AALK-01A-11R-A41G-13 | TCGA-3C-AALK |
| TCGA-BRCA | Primary Tumor | TCGA-4H-AAAK-01A-12R-A41G-13 | TCGA-4H-AAAK |
| TCGA-BRCA | Primary Tumor | TCGA-5L-AAT0-01A-12R-A41G-13 | TCGA-5L-AAT0 |
| TCGA-BRCA | Primary Tumor | TCGA-5L-AAT1-01A-12R-A41G-13 | TCGA-5L-AAT1 |
| TCGA-BRCA | Primary Tumor | TCGA-5T-A9QA-01A-11R-A41G-13 | TCGA-5T-A9QA |
| TCGA-BRCA | Primary Tumor | TCGA-A1-A0SB-01A-11R-A143-13 | TCGA-A1-A0SB |
| TCGA-BRCA | Primary Tumor | TCGA-A1-A0SD-01A-11R-A114-13 | TCGA-A1-A0SD |
| TCGA-BRCA | Primary Tumor | TCGA-A1-A0SE-01A-11R-A085-13 | TCGA-A1-A0SE |
| TCGA-BRCA | Primary Tumor | TCGA-A1-A0SF-01A-11R-A143-13 | TCGA-A1-A0SF |
| TCGA-BRCA | Primary Tumor | TCGA-A1-A0SG-01A-11R-A143-13 | TCGA-A1-A0SG |
| TCGA-BRCA | Primary Tumor | TCGA-A1-A0SH-01A-11R-A085-13 | TCGA-A1-A0SH |
| TCGA-BRCA | Primary Tumor | TCGA-A1-A0SI-01A-11R-A143-13 | TCGA-A1-A0SI |
| TCGA-BRCA | Primary Tumor | TCGA-A1-A0SJ-01A-11R-A085-13 | TCGA-A1-A0SJ |
| TCGA-BRCA | Primary Tumor | TCGA-A1-A0SK-01A-12R-A085-13 | TCGA-A1-A0SK |
| TCGA-BRCA | Primary Tumor | TCGA-A1-A0SM-01A-11R-A085-13 | TCGA-A1-A0SM |
| TCGA-BRCA | Primary Tumor | TCGA-A1-A0SN-01A-11R-A143-13 | TCGA-A1-A0SN |
| TCGA-BRCA | Primary Tumor | TCGA-A1-A0SO-01A-22R-A085-13 | TCGA-A1-A0SO |
| TCGA-BRCA | Primary Tumor | TCGA-A1-A0SP-01A-11R-A085-13 | TCGA-A1-A0SP |
| TCGA-BRCA | Primary Tumor | TCGA-A1-A0SQ-01A-21R-A143-13 | TCGA-A1-A0SQ |
| TCGA-BRCA | Primary Tumor | TCGA-A2-A04N-01A-11R-A114-13 | TCGA-A2-A04N |
| TCGA-BRCA | Primary Tumor | TCGA-A2-A04P-01A-31R-A035-13 | TCGA-A2-A04P |
| TCGA-BRCA | Primary Tumor | TCGA-A2-A04Q-01A-21R-A035-13 | TCGA-A2-A04Q |
| TCGA-BRCA | Primary Tumor | TCGA-A2-A04R-01A-41R-A108-13 | TCGA-A2-A04R |
| TCGA-BRCA | Primary Tumor | TCGA-A2-A04T-01A-21R-A035-13 | TCGA-A2-A04T |
| TCGA-BRCA | Primary Tumor | TCGA-A2-A04U-01A-11R-A114-13 | TCGA-A2-A04U |
| TCGA-BRCA | Primary Tumor | TCGA-A2-A04V-01A-21R-A035-13 | TCGA-A2-A04V |
| TCGA-BRCA | Primary Tumor | TCGA-A2-A04W-01A-31R-A114-13 | TCGA-A2-A04W |
| TCGA-BRCA | Primary Tumor | TCGA-A2-A04X-01A-21R-A035-13 | TCGA-A2-A04X |
| TCGA-BRCA | Primary Tumor | TCGA-A2-A04Y-01A-21R-A035-13 | TCGA-A2-A04Y |
| TCGA-BRCA | Primary Tumor | TCGA-A2-A0CK-01A-11R-A22I-13 | TCGA-A2-A0CK |
| TCGA-BRCA | Primary Tumor | TCGA-A2-A0CL-01A-11R-A114-13 | TCGA-A2-A0CL |
| TCGA-BRCA | Primary Tumor | TCGA-A2-A0CM-01A-31R-A035-13 | TCGA-A2-A0CM |
| TCGA-BRCA | Primary Tumor | TCGA-A2-A0CO-01A-13R-A22I-13 | TCGA-A2-A0CO |
| TCGA-BRCA | Primary Tumor | TCGA-A2-A0CP-01A-11R-A035-13 | TCGA-A2-A0CP |
| TCGA-BRCA | Primary Tumor | TCGA-A2-A0CQ-01A-21R-A035-13 | TCGA-A2-A0CQ |
| TCGA-BRCA | Primary Tumor | TCGA-A2-A0CR-01A-11R-A22I-13 | TCGA-A2-A0CR |

|           |               |                              |              |
|-----------|---------------|------------------------------|--------------|
| TCGA-BRCA | Primary Tumor | TCGA-A2-A0CS-01A-11R-A114-13 | TCGA-A2-A0CS |
| TCGA-BRCA | Primary Tumor | TCGA-A2-A0CT-01A-31R-A057-13 | TCGA-A2-A0CT |
| TCGA-BRCA | Primary Tumor | TCGA-A2-A0CU-01A-12R-A035-13 | TCGA-A2-A0CU |
| TCGA-BRCA | Primary Tumor | TCGA-A2-A0CV-01A-31R-A114-13 | TCGA-A2-A0CV |
| TCGA-BRCA | Primary Tumor | TCGA-A2-A0CW-01A-21R-A114-13 | TCGA-A2-A0CW |
| TCGA-BRCA | Primary Tumor | TCGA-A2-A0CY-01A-12R-A035-13 | TCGA-A2-A0CY |
| TCGA-BRCA | Primary Tumor | TCGA-A2-A0CZ-01A-11R-A035-13 | TCGA-A2-A0CZ |
| TCGA-BRCA | Primary Tumor | TCGA-A2-A0D0-01A-11R-A010-13 | TCGA-A2-A0D0 |
| TCGA-BRCA | Primary Tumor | TCGA-A2-A0D1-01A-11R-A035-13 | TCGA-A2-A0D1 |
| TCGA-BRCA | Primary Tumor | TCGA-A2-A0D2-01A-21R-A035-13 | TCGA-A2-A0D2 |
| TCGA-BRCA | Primary Tumor | TCGA-A2-A0D3-01A-11R-A114-13 | TCGA-A2-A0D3 |
| TCGA-BRCA | Primary Tumor | TCGA-A2-A0D4-01A-11R-A038-13 | TCGA-A2-A0D4 |
| TCGA-BRCA | Primary Tumor | TCGA-A2-A0EM-01A-11R-A035-13 | TCGA-A2-A0EM |
| TCGA-BRCA | Primary Tumor | TCGA-A2-A0EN-01A-13R-A085-13 | TCGA-A2-A0EN |
| TCGA-BRCA | Primary Tumor | TCGA-A2-A0EO-01A-11R-A035-13 | TCGA-A2-A0EO |
| TCGA-BRCA | Primary Tumor | TCGA-A2-A0EP-01A-52R-A22V-13 | TCGA-A2-A0EP |
| TCGA-BRCA | Primary Tumor | TCGA-A2-A0EQ-01A-11R-A035-13 | TCGA-A2-A0EQ |
| TCGA-BRCA | Primary Tumor | TCGA-A2-A0ER-01A-21R-A035-13 | TCGA-A2-A0ER |
| TCGA-BRCA | Primary Tumor | TCGA-A2-A0ES-01A-11R-A114-13 | TCGA-A2-A0ES |
| TCGA-BRCA | Primary Tumor | TCGA-A2-A0ET-01A-31R-A035-13 | TCGA-A2-A0ET |
| TCGA-BRCA | Primary Tumor | TCGA-A2-A0EU-01A-22R-A057-13 | TCGA-A2-A0EU |
| TCGA-BRCA | Primary Tumor | TCGA-A2-A0EV-01A-11R-A035-13 | TCGA-A2-A0EV |
| TCGA-BRCA | Primary Tumor | TCGA-A2-A0EW-01A-21R-A114-13 | TCGA-A2-A0EW |
| TCGA-BRCA | Primary Tumor | TCGA-A2-A0EX-01A-21R-A035-13 | TCGA-A2-A0EX |
| TCGA-BRCA | Primary Tumor | TCGA-A2-A0EY-01A-11R-A035-13 | TCGA-A2-A0EY |
| TCGA-BRCA | Primary Tumor | TCGA-A2-A0ST-01A-12R-A085-13 | TCGA-A2-A0ST |
| TCGA-BRCA | Primary Tumor | TCGA-A2-A0SU-01A-11R-A085-13 | TCGA-A2-A0SU |
| TCGA-BRCA | Primary Tumor | TCGA-A2-A0SV-01A-11R-A085-13 | TCGA-A2-A0SV |
| TCGA-BRCA | Primary Tumor | TCGA-A2-A0SW-01A-11R-A085-13 | TCGA-A2-A0SW |
| TCGA-BRCA | Primary Tumor | TCGA-A2-A0SX-01A-12R-A085-13 | TCGA-A2-A0SX |
| TCGA-BRCA | Primary Tumor | TCGA-A2-A0SY-01A-31R-A085-13 | TCGA-A2-A0SY |
| TCGA-BRCA | Primary Tumor | TCGA-A2-A0T0-01A-22R-A085-13 | TCGA-A2-A0T0 |
| TCGA-BRCA | Primary Tumor | TCGA-A2-A0T1-01A-21R-A085-13 | TCGA-A2-A0T1 |
| TCGA-BRCA | Primary Tumor | TCGA-A2-A0T2-01A-11R-A085-13 | TCGA-A2-A0T2 |
| TCGA-BRCA | Primary Tumor | TCGA-A2-A0T3-01A-21R-A114-13 | TCGA-A2-A0T3 |
| TCGA-BRCA | Primary Tumor | TCGA-A2-A0T4-01A-31R-A085-13 | TCGA-A2-A0T4 |
| TCGA-BRCA | Primary Tumor | TCGA-A2-A0T5-01A-21R-A085-13 | TCGA-A2-A0T5 |
| TCGA-BRCA | Primary Tumor | TCGA-A2-A0T6-01A-11R-A085-13 | TCGA-A2-A0T6 |
| TCGA-BRCA | Primary Tumor | TCGA-A2-A0T7-01A-21R-A085-13 | TCGA-A2-A0T7 |
| TCGA-BRCA | Primary Tumor | TCGA-A2-A0YC-01A-11R-A108-13 | TCGA-A2-A0YC |
| TCGA-BRCA | Primary Tumor | TCGA-A2-A0YD-01A-11R-A108-13 | TCGA-A2-A0YD |
| TCGA-BRCA | Primary Tumor | TCGA-A2-A0YF-01A-21R-A108-13 | TCGA-A2-A0YF |
| TCGA-BRCA | Primary Tumor | TCGA-A2-A0YG-01A-21R-A108-13 | TCGA-A2-A0YG |
| TCGA-BRCA | Primary Tumor | TCGA-A2-A0YH-01A-11R-A108-13 | TCGA-A2-A0YH |
| TCGA-BRCA | Primary Tumor | TCGA-A2-A0YI-01A-31R-A10I-13 | TCGA-A2-A0YI |
| TCGA-BRCA | Primary Tumor | TCGA-A2-A0YK-01A-22R-A108-13 | TCGA-A2-A0YK |
| TCGA-BRCA | Primary Tumor | TCGA-A2-A0YL-01A-21R-A108-13 | TCGA-A2-A0YL |
| TCGA-BRCA | Primary Tumor | TCGA-A2-A0YM-01A-11R-A108-13 | TCGA-A2-A0YM |
| TCGA-BRCA | Primary Tumor | TCGA-A2-A0YT-01A-11R-A108-13 | TCGA-A2-A0YT |
| TCGA-BRCA | Primary Tumor | TCGA-A2-A1FV-01A-11R-A13P-13 | TCGA-A2-A1FV |
| TCGA-BRCA | Primary Tumor | TCGA-A2-A1FW-01A-11R-A13P-13 | TCGA-A2-A1FW |
| TCGA-BRCA | Primary Tumor | TCGA-A2-A1FX-01A-11R-A13P-13 | TCGA-A2-A1FX |
| TCGA-BRCA | Primary Tumor | TCGA-A2-A1FZ-01A-51R-A14C-13 | TCGA-A2-A1FZ |
| TCGA-BRCA | Primary Tumor | TCGA-A2-A1G0-01A-11R-A13P-13 | TCGA-A2-A1G0 |
| TCGA-BRCA | Primary Tumor | TCGA-A2-A1G1-01A-21R-A13P-13 | TCGA-A2-A1G1 |
| TCGA-BRCA | Primary Tumor | TCGA-A2-A1G4-01A-11R-A13P-13 | TCGA-A2-A1G4 |
| TCGA-BRCA | Primary Tumor | TCGA-A2-A1G6-01A-11R-A13P-13 | TCGA-A2-A1G6 |
| TCGA-BRCA | Primary Tumor | TCGA-A2-A259-01A-11R-A16E-13 | TCGA-A2-A259 |
| TCGA-BRCA | Primary Tumor | TCGA-A2-A25A-01A-12R-A16E-13 | TCGA-A2-A25A |

|           |               |                              |              |
|-----------|---------------|------------------------------|--------------|
| TCGA-BRCA | Primary Tumor | TCGA-A2-A25B-01A-11R-A168-13 | TCGA-A2-A25B |
| TCGA-BRCA | Primary Tumor | TCGA-A2-A25C-01A-11R-A168-13 | TCGA-A2-A25C |
| TCGA-BRCA | Primary Tumor | TCGA-A2-A25D-01A-12R-A16E-13 | TCGA-A2-A25D |
| TCGA-BRCA | Primary Tumor | TCGA-A2-A25E-01A-11R-A168-13 | TCGA-A2-A25E |
| TCGA-BRCA | Primary Tumor | TCGA-A2-A25F-01A-11R-A168-13 | TCGA-A2-A25F |
| TCGA-BRCA | Primary Tumor | TCGA-A2-A3KC-01A-11R-A214-13 | TCGA-A2-A3KC |
| TCGA-BRCA | Primary Tumor | TCGA-A2-A3KD-01A-12R-A214-13 | TCGA-A2-A3KD |
| TCGA-BRCA | Primary Tumor | TCGA-A2-A3XS-01A-11R-A22V-13 | TCGA-A2-A3XS |
| TCGA-BRCA | Primary Tumor | TCGA-A2-A3XT-01A-11R-A22V-13 | TCGA-A2-A3XT |
| TCGA-BRCA | Primary Tumor | TCGA-A2-A3XU-01A-12R-A22V-13 | TCGA-A2-A3XU |
| TCGA-BRCA | Primary Tumor | TCGA-A2-A3XV-01A-21R-A23A-13 | TCGA-A2-A3XV |
| TCGA-BRCA | Primary Tumor | TCGA-A2-A3XW-01A-11R-A23A-13 | TCGA-A2-A3XW |
| TCGA-BRCA | Primary Tumor | TCGA-A2-A3XX-01A-21R-A23A-13 | TCGA-A2-A3XX |
| TCGA-BRCA | Primary Tumor | TCGA-A2-A3XY-01A-11R-A23A-13 | TCGA-A2-A3XY |
| TCGA-BRCA | Primary Tumor | TCGA-A2-A3XZ-01A-42R-A23A-13 | TCGA-A2-A3XZ |
| TCGA-BRCA | Primary Tumor | TCGA-A2-A3Y0-01A-11R-A23A-13 | TCGA-A2-A3Y0 |
| TCGA-BRCA | Primary Tumor | TCGA-A2-A4RW-01A-21R-A25Z-13 | TCGA-A2-A4RW |
| TCGA-BRCA | Primary Tumor | TCGA-A2-A4RX-01A-11R-A25Z-13 | TCGA-A2-A4RX |
| TCGA-BRCA | Primary Tumor | TCGA-A2-A4RY-01A-31R-A25Z-13 | TCGA-A2-A4RY |
| TCGA-BRCA | Primary Tumor | TCGA-A2-A4S0-01A-21R-A25Z-13 | TCGA-A2-A4S0 |
| TCGA-BRCA | Primary Tumor | TCGA-A2-A4S1-01A-21R-A25Z-13 | TCGA-A2-A4S1 |
| TCGA-BRCA | Primary Tumor | TCGA-A2-A4S2-01A-12R-A25Z-13 | TCGA-A2-A4S2 |
| TCGA-BRCA | Primary Tumor | TCGA-A2-A4S3-01A-21R-A25Z-13 | TCGA-A2-A4S3 |
| TCGA-BRCA | Primary Tumor | TCGA-A7-A0CD-01A-11R-A010-13 | TCGA-A7-A0CD |
| TCGA-BRCA | Primary Tumor | TCGA-A7-A0CE-01A-11R-A010-13 | TCGA-A7-A0CE |
| TCGA-BRCA | Primary Tumor | TCGA-A7-A0CG-01A-11R-A038-13 | TCGA-A7-A0CG |
| TCGA-BRCA | Primary Tumor | TCGA-A7-A0CH-01A-21R-A038-13 | TCGA-A7-A0CH |
| TCGA-BRCA | Primary Tumor | TCGA-A7-A0CJ-01A-21R-A010-13 | TCGA-A7-A0CJ |
| TCGA-BRCA | Primary Tumor | TCGA-A7-A0D9-01A-31R-A057-13 | TCGA-A7-A0D9 |
| TCGA-BRCA | Primary Tumor | TCGA-A7-A0DA-01A-31R-A114-13 | TCGA-A7-A0DA |
| TCGA-BRCA | Primary Tumor | TCGA-A7-A0DB-01A-11R-A010-13 | TCGA-A7-A0DB |
| TCGA-BRCA | Primary Tumor | TCGA-A7-A0DB-01A-11R-A27D-13 | TCGA-A7-A0DB |
| TCGA-BRCA | Primary Tumor | TCGA-A7-A0DB-01C-02R-A27D-13 | TCGA-A7-A0DB |
| TCGA-BRCA | Primary Tumor | TCGA-A7-A0DC-01A-11R-A010-13 | TCGA-A7-A0DC |
| TCGA-BRCA | Primary Tumor | TCGA-A7-A0DC-01B-04R-A22P-13 | TCGA-A7-A0DC |
| TCGA-BRCA | Primary Tumor | TCGA-A7-A13D-01A-13R-A12O-13 | TCGA-A7-A13D |
| TCGA-BRCA | Primary Tumor | TCGA-A7-A13D-01A-13R-A27D-13 | TCGA-A7-A13D |
| TCGA-BRCA | Primary Tumor | TCGA-A7-A13D-01B-04R-A27D-13 | TCGA-A7-A13D |
| TCGA-BRCA | Primary Tumor | TCGA-A7-A13E-01A-11R-A12O-13 | TCGA-A7-A13E |
| TCGA-BRCA | Primary Tumor | TCGA-A7-A13E-01A-11R-A27D-13 | TCGA-A7-A13E |
| TCGA-BRCA | Primary Tumor | TCGA-A7-A13E-01B-06R-A27D-13 | TCGA-A7-A13E |
| TCGA-BRCA | Primary Tumor | TCGA-A7-A13F-01A-11R-A12O-13 | TCGA-A7-A13F |
| TCGA-BRCA | Primary Tumor | TCGA-A7-A13G-01A-11R-A13P-13 | TCGA-A7-A13G |
| TCGA-BRCA | Primary Tumor | TCGA-A7-A13G-01B-04R-A22P-13 | TCGA-A7-A13G |
| TCGA-BRCA | Primary Tumor | TCGA-A7-A13H-01A-11R-A22I-13 | TCGA-A7-A13H |
| TCGA-BRCA | Primary Tumor | TCGA-A7-A26E-01A-11R-A168-13 | TCGA-A7-A26E |
| TCGA-BRCA | Primary Tumor | TCGA-A7-A26E-01A-11R-A27D-13 | TCGA-A7-A26E |
| TCGA-BRCA | Primary Tumor | TCGA-A7-A26E-01B-06R-A27D-13 | TCGA-A7-A26E |
| TCGA-BRCA | Primary Tumor | TCGA-A7-A26F-01A-21R-A168-13 | TCGA-A7-A26F |
| TCGA-BRCA | Primary Tumor | TCGA-A7-A26F-01B-04R-A22P-13 | TCGA-A7-A26F |
| TCGA-BRCA | Primary Tumor | TCGA-A7-A26G-01A-21R-A168-13 | TCGA-A7-A26G |
| TCGA-BRCA | Primary Tumor | TCGA-A7-A26H-01A-11R-A168-13 | TCGA-A7-A26H |
| TCGA-BRCA | Primary Tumor | TCGA-A7-A26I-01A-11R-A168-13 | TCGA-A7-A26I |
| TCGA-BRCA | Primary Tumor | TCGA-A7-A26I-01B-06R-A22P-13 | TCGA-A7-A26I |
| TCGA-BRCA | Primary Tumor | TCGA-A7-A26J-01A-11R-A168-13 | TCGA-A7-A26J |
| TCGA-BRCA | Primary Tumor | TCGA-A7-A26J-01A-11R-A27D-13 | TCGA-A7-A26J |
| TCGA-BRCA | Primary Tumor | TCGA-A7-A26J-01B-02R-A27D-13 | TCGA-A7-A26J |
| TCGA-BRCA | Primary Tumor | TCGA-A7-A2KD-01A-31R-A21U-13 | TCGA-A7-A2KD |
| TCGA-BRCA | Primary Tumor | TCGA-A7-A3IY-01A-21R-A21U-13 | TCGA-A7-A3IY |

|           |               |                              |              |
|-----------|---------------|------------------------------|--------------|
| TCGA-BRCA | Primary Tumor | TCGA-A7-A3IZ-01A-11R-A214-13 | TCGA-A7-A3IZ |
| TCGA-BRCA | Primary Tumor | TCGA-A7-A3J0-01A-11R-A214-13 | TCGA-A7-A3J0 |
| TCGA-BRCA | Primary Tumor | TCGA-A7-A3J1-01A-11R-A214-13 | TCGA-A7-A3J1 |
| TCGA-BRCA | Primary Tumor | TCGA-A7-A3RF-01A-11R-A22I-13 | TCGA-A7-A3RF |
| TCGA-BRCA | Primary Tumor | TCGA-A7-A425-01A-11R-A24J-13 | TCGA-A7-A425 |
| TCGA-BRCA | Primary Tumor | TCGA-A7-A426-01A-22R-A24J-13 | TCGA-A7-A426 |
| TCGA-BRCA | Primary Tumor | TCGA-A7-A4SA-01A-11R-A25Z-13 | TCGA-A7-A4SA |
| TCGA-BRCA | Primary Tumor | TCGA-A7-A4SB-01A-21R-A25Z-13 | TCGA-A7-A4SB |
| TCGA-BRCA | Primary Tumor | TCGA-A7-A4SC-01A-12R-A25Z-13 | TCGA-A7-A4SC |
| TCGA-BRCA | Primary Tumor | TCGA-A7-A4SD-01A-11R-A25Z-13 | TCGA-A7-A4SD |
| TCGA-BRCA | Primary Tumor | TCGA-A7-A4SE-01A-11R-A25Z-13 | TCGA-A7-A4SE |
| TCGA-BRCA | Primary Tumor | TCGA-A7-A4SF-01A-11R-A25Z-13 | TCGA-A7-A4SF |
| TCGA-BRCA | Primary Tumor | TCGA-A7-A56D-01A-11R-A27U-13 | TCGA-A7-A56D |
| TCGA-BRCA | Primary Tumor | TCGA-A7-A5ZV-01A-11R-A28I-13 | TCGA-A7-A5ZV |
| TCGA-BRCA | Primary Tumor | TCGA-A7-A5ZW-01A-12R-A29V-13 | TCGA-A7-A5ZW |
| TCGA-BRCA | Primary Tumor | TCGA-A7-A5ZX-01A-12R-A29V-13 | TCGA-A7-A5ZX |
| TCGA-BRCA | Primary Tumor | TCGA-A7-A6VV-01A-22R-A33A-13 | TCGA-A7-A6VV |
| TCGA-BRCA | Primary Tumor | TCGA-A7-A6VW-01A-21R-A33A-13 | TCGA-A7-A6VW |
| TCGA-BRCA | Primary Tumor | TCGA-A7-A6VX-01A-12R-A33A-13 | TCGA-A7-A6VX |
| TCGA-BRCA | Primary Tumor | TCGA-A7-A6VY-01A-12R-A33A-13 | TCGA-A7-A6VY |
| TCGA-BRCA | Primary Tumor | TCGA-A8-A06N-01A-11R-A010-13 | TCGA-A8-A06N |
| TCGA-BRCA | Primary Tumor | TCGA-A8-A06O-01A-11R-A010-13 | TCGA-A8-A06O |
| TCGA-BRCA | Primary Tumor | TCGA-A8-A06P-01A-11R-A010-13 | TCGA-A8-A06P |
| TCGA-BRCA | Primary Tumor | TCGA-A8-A06Q-01A-11R-A035-13 | TCGA-A8-A06Q |
| TCGA-BRCA | Primary Tumor | TCGA-A8-A06R-01A-11R-A010-13 | TCGA-A8-A06R |
| TCGA-BRCA | Primary Tumor | TCGA-A8-A06T-01A-11R-A010-13 | TCGA-A8-A06T |
| TCGA-BRCA | Primary Tumor | TCGA-A8-A06U-01A-11R-A010-13 | TCGA-A8-A06U |
| TCGA-BRCA | Primary Tumor | TCGA-A8-A06Y-01A-21R-A010-13 | TCGA-A8-A06Y |
| TCGA-BRCA | Primary Tumor | TCGA-A8-A06Z-01A-11R-A010-13 | TCGA-A8-A06Z |
| TCGA-BRCA | Primary Tumor | TCGA-A8-A075-01A-11R-A085-13 | TCGA-A8-A075 |
| TCGA-BRCA | Primary Tumor | TCGA-A8-A076-01A-21R-A010-13 | TCGA-A8-A076 |
| TCGA-BRCA | Primary Tumor | TCGA-A8-A079-01A-21R-A010-13 | TCGA-A8-A079 |
| TCGA-BRCA | Primary Tumor | TCGA-A8-A07B-01A-11R-A010-13 | TCGA-A8-A07B |
| TCGA-BRCA | Primary Tumor | TCGA-A8-A07C-01A-11R-A035-13 | TCGA-A8-A07C |
| TCGA-BRCA | Primary Tumor | TCGA-A8-A07E-01A-11R-A035-13 | TCGA-A8-A07E |
| TCGA-BRCA | Primary Tumor | TCGA-A8-A07F-01A-11R-A038-13 | TCGA-A8-A07F |
| TCGA-BRCA | Primary Tumor | TCGA-A8-A07G-01A-11R-A035-13 | TCGA-A8-A07G |
| TCGA-BRCA | Primary Tumor | TCGA-A8-A07I-01A-11R-A010-13 | TCGA-A8-A07I |
| TCGA-BRCA | Primary Tumor | TCGA-A8-A07J-01A-21R-A057-13 | TCGA-A8-A07J |
| TCGA-BRCA | Primary Tumor | TCGA-A8-A07L-01A-11R-A010-13 | TCGA-A8-A07L |
| TCGA-BRCA | Primary Tumor | TCGA-A8-A07O-01A-11R-A038-13 | TCGA-A8-A07O |
| TCGA-BRCA | Primary Tumor | TCGA-A8-A07P-01A-11R-A010-13 | TCGA-A8-A07P |
| TCGA-BRCA | Primary Tumor | TCGA-A8-A07R-01A-21R-A035-13 | TCGA-A8-A07R |
| TCGA-BRCA | Primary Tumor | TCGA-A8-A07S-01A-11R-A035-13 | TCGA-A8-A07S |
| TCGA-BRCA | Primary Tumor | TCGA-A8-A07U-01A-11R-A035-13 | TCGA-A8-A07U |
| TCGA-BRCA | Primary Tumor | TCGA-A8-A07W-01A-11R-A010-13 | TCGA-A8-A07W |
| TCGA-BRCA | Primary Tumor | TCGA-A8-A07Z-01A-11R-A010-13 | TCGA-A8-A07Z |
| TCGA-BRCA | Primary Tumor | TCGA-A8-A081-01A-11R-A010-13 | TCGA-A8-A081 |
| TCGA-BRCA | Primary Tumor | TCGA-A8-A082-01A-11R-A010-13 | TCGA-A8-A082 |
| TCGA-BRCA | Primary Tumor | TCGA-A8-A083-01A-21R-A010-13 | TCGA-A8-A083 |
| TCGA-BRCA | Primary Tumor | TCGA-A8-A084-01A-21R-A010-13 | TCGA-A8-A084 |
| TCGA-BRCA | Primary Tumor | TCGA-A8-A085-01A-11R-A010-13 | TCGA-A8-A085 |
| TCGA-BRCA | Primary Tumor | TCGA-A8-A086-01A-11R-A010-13 | TCGA-A8-A086 |
| TCGA-BRCA | Primary Tumor | TCGA-A8-A08A-01A-11R-A010-13 | TCGA-A8-A08A |
| TCGA-BRCA | Primary Tumor | TCGA-A8-A08B-01A-11R-A010-13 | TCGA-A8-A08B |
| TCGA-BRCA | Primary Tumor | TCGA-A8-A08G-01A-11R-A010-13 | TCGA-A8-A08G |
| TCGA-BRCA | Primary Tumor | TCGA-A8-A08H-01A-21R-A010-13 | TCGA-A8-A08H |
| TCGA-BRCA | Primary Tumor | TCGA-A8-A08I-01A-11R-A010-13 | TCGA-A8-A08I |
| TCGA-BRCA | Primary Tumor | TCGA-A8-A08J-01A-11R-A010-13 | TCGA-A8-A08J |

|           |               |                              |              |
|-----------|---------------|------------------------------|--------------|
| TCGA-BRCA | Primary Tumor | TCGA-A8-A08L-01A-11R-A010-13 | TCGA-A8-A08L |
| TCGA-BRCA | Primary Tumor | TCGA-A8-A08O-01A-21R-A057-13 | TCGA-A8-A08O |
| TCGA-BRCA | Primary Tumor | TCGA-A8-A08R-01A-11R-A035-13 | TCGA-A8-A08R |
| TCGA-BRCA | Primary Tumor | TCGA-A8-A08S-01A-11R-A035-13 | TCGA-A8-A08S |
| TCGA-BRCA | Primary Tumor | TCGA-A8-A08T-01A-21R-A010-13 | TCGA-A8-A08T |
| TCGA-BRCA | Primary Tumor | TCGA-A8-A08X-01A-21R-A010-13 | TCGA-A8-A08X |
| TCGA-BRCA | Primary Tumor | TCGA-A8-A08Z-01A-21R-A010-13 | TCGA-A8-A08Z |
| TCGA-BRCA | Primary Tumor | TCGA-A8-A090-01A-11R-A010-13 | TCGA-A8-A090 |
| TCGA-BRCA | Primary Tumor | TCGA-A8-A091-01A-11R-A010-13 | TCGA-A8-A091 |
| TCGA-BRCA | Primary Tumor | TCGA-A8-A092-01A-11R-A010-13 | TCGA-A8-A092 |
| TCGA-BRCA | Primary Tumor | TCGA-A8-A093-01A-11R-A010-13 | TCGA-A8-A093 |
| TCGA-BRCA | Primary Tumor | TCGA-A8-A094-01A-11R-A038-13 | TCGA-A8-A094 |
| TCGA-BRCA | Primary Tumor | TCGA-A8-A095-01A-11R-A010-13 | TCGA-A8-A095 |
| TCGA-BRCA | Primary Tumor | TCGA-A8-A096-01A-11R-A038-13 | TCGA-A8-A096 |
| TCGA-BRCA | Primary Tumor | TCGA-A8-A097-01A-11R-A035-13 | TCGA-A8-A097 |
| TCGA-BRCA | Primary Tumor | TCGA-A8-A099-01A-11R-A010-13 | TCGA-A8-A099 |
| TCGA-BRCA | Primary Tumor | TCGA-A8-A09A-01A-11R-A038-13 | TCGA-A8-A09A |
| TCGA-BRCA | Primary Tumor | TCGA-A8-A09B-01A-11R-A010-13 | TCGA-A8-A09B |
| TCGA-BRCA | Primary Tumor | TCGA-A8-A09C-01A-11R-A010-13 | TCGA-A8-A09C |
| TCGA-BRCA | Primary Tumor | TCGA-A8-A09D-01A-11R-A010-13 | TCGA-A8-A09D |
| TCGA-BRCA | Primary Tumor | TCGA-A8-A09E-01A-11R-A010-13 | TCGA-A8-A09E |
| TCGA-BRCA | Primary Tumor | TCGA-A8-A09G-01A-21R-A010-13 | TCGA-A8-A09G |
| TCGA-BRCA | Primary Tumor | TCGA-A8-A09I-01A-22R-A035-13 | TCGA-A8-A09I |
| TCGA-BRCA | Primary Tumor | TCGA-A8-A09K-01A-11R-A010-13 | TCGA-A8-A09K |
| TCGA-BRCA | Primary Tumor | TCGA-A8-A09M-01A-11R-A010-13 | TCGA-A8-A09M |
| TCGA-BRCA | Primary Tumor | TCGA-A8-A09N-01A-11R-A010-13 | TCGA-A8-A09N |
| TCGA-BRCA | Primary Tumor | TCGA-A8-A09Q-01A-11R-A010-13 | TCGA-A8-A09Q |
| TCGA-BRCA | Primary Tumor | TCGA-A8-A09R-01A-11R-A010-13 | TCGA-A8-A09R |
| TCGA-BRCA | Primary Tumor | TCGA-A8-A09T-01A-11R-A010-13 | TCGA-A8-A09T |
| TCGA-BRCA | Primary Tumor | TCGA-A8-A09X-01A-11R-A010-13 | TCGA-A8-A09X |
| TCGA-BRCA | Primary Tumor | TCGA-A8-A09Z-01A-11R-A010-13 | TCGA-A8-A09Z |
| TCGA-BRCA | Primary Tumor | TCGA-A8-A0A1-01A-11R-A010-13 | TCGA-A8-A0A1 |
| TCGA-BRCA | Primary Tumor | TCGA-A8-A0A2-01A-11R-A035-13 | TCGA-A8-A0A2 |
| TCGA-BRCA | Primary Tumor | TCGA-A8-A0A4-01A-11R-A010-13 | TCGA-A8-A0A4 |
| TCGA-BRCA | Primary Tumor | TCGA-A8-A0A6-01A-12R-A057-13 | TCGA-A8-A0A6 |
| TCGA-BRCA | Primary Tumor | TCGA-A8-A0A7-01A-11R-A010-13 | TCGA-A8-A0A7 |
| TCGA-BRCA | Primary Tumor | TCGA-A8-A0A9-01A-11R-A010-13 | TCGA-A8-A0A9 |
| TCGA-BRCA | Primary Tumor | TCGA-A8-A0AB-01A-11R-A035-13 | TCGA-A8-A0AB |
| TCGA-BRCA | Primary Tumor | TCGA-A8-A0AD-01A-11R-A057-13 | TCGA-A8-A0AD |
| TCGA-BRCA | Primary Tumor | TCGA-AC-A23C-01A-12R-A168-13 | TCGA-AC-A23C |
| TCGA-BRCA | Primary Tumor | TCGA-AC-A23E-01A-11R-A156-13 | TCGA-AC-A23E |
| TCGA-BRCA | Primary Tumor | TCGA-AC-A23G-01A-11R-A214-13 | TCGA-AC-A23G |
| TCGA-BRCA | Primary Tumor | TCGA-AC-A23H-01A-11R-A156-13 | TCGA-AC-A23H |
| TCGA-BRCA | Primary Tumor | TCGA-AC-A2B8-01A-11R-A17A-13 | TCGA-AC-A2B8 |
| TCGA-BRCA | Primary Tumor | TCGA-AC-A2BK-01A-11R-A21U-13 | TCGA-AC-A2BK |
| TCGA-BRCA | Primary Tumor | TCGA-AC-A2BM-01A-11R-A21U-13 | TCGA-AC-A2BM |
| TCGA-BRCA | Primary Tumor | TCGA-AC-A2FB-01A-11R-A17A-13 | TCGA-AC-A2FB |
| TCGA-BRCA | Primary Tumor | TCGA-AC-A2FE-01A-11R-A19V-13 | TCGA-AC-A2FE |
| TCGA-BRCA | Primary Tumor | TCGA-AC-A2FF-01A-11R-A17A-13 | TCGA-AC-A2FF |
| TCGA-BRCA | Primary Tumor | TCGA-AC-A2FG-01A-11R-A17A-13 | TCGA-AC-A2FG |
| TCGA-BRCA | Primary Tumor | TCGA-AC-A2FK-01A-12R-A17X-13 | TCGA-AC-A2FK |
| TCGA-BRCA | Primary Tumor | TCGA-AC-A2FM-01A-11R-A19V-13 | TCGA-AC-A2FM |
| TCGA-BRCA | Primary Tumor | TCGA-AC-A2FO-01A-11R-A17X-13 | TCGA-AC-A2FO |
| TCGA-BRCA | Primary Tumor | TCGA-AC-A2QH-01A-11R-A18L-13 | TCGA-AC-A2QH |
| TCGA-BRCA | Primary Tumor | TCGA-AC-A2QH-01B-04R-A22P-13 | TCGA-AC-A2QH |
| TCGA-BRCA | Primary Tumor | TCGA-AC-A2QI-01A-12R-A19V-13 | TCGA-AC-A2QI |
| TCGA-BRCA | Primary Tumor | TCGA-AC-A2QJ-01A-12R-A19V-13 | TCGA-AC-A2QJ |
| TCGA-BRCA | Primary Tumor | TCGA-AC-A3BB-01A-21R-A19V-13 | TCGA-AC-A3BB |
| TCGA-BRCA | Primary Tumor | TCGA-AC-A3EH-01A-22R-A22I-13 | TCGA-AC-A3EH |

|           |               |                              |              |
|-----------|---------------|------------------------------|--------------|
| TCGA-BRCA | Primary Tumor | TCGA-AC-A3HN-01A-11R-A214-13 | TCGA-AC-A3HN |
| TCGA-BRCA | Primary Tumor | TCGA-AC-A3OD-01A-11R-A21U-13 | TCGA-AC-A3OD |
| TCGA-BRCA | Primary Tumor | TCGA-AC-A3OD-01B-06R-A22P-13 | TCGA-AC-A3OD |
| TCGA-BRCA | Primary Tumor | TCGA-AC-A3QP-01A-11R-A22V-13 | TCGA-AC-A3QP |
| TCGA-BRCA | Primary Tumor | TCGA-AC-A3QQ-01A-11R-A22I-13 | TCGA-AC-A3QQ |
| TCGA-BRCA | Primary Tumor | TCGA-AC-A3QQ-01B-06R-A22P-13 | TCGA-AC-A3QQ |
| TCGA-BRCA | Primary Tumor | TCGA-AC-A3TM-01A-11R-A22I-13 | TCGA-AC-A3TM |
| TCGA-BRCA | Primary Tumor | TCGA-AC-A3TN-01A-11R-A22I-13 | TCGA-AC-A3TN |
| TCGA-BRCA | Primary Tumor | TCGA-AC-A3W5-01A-11R-A22I-13 | TCGA-AC-A3W5 |
| TCGA-BRCA | Primary Tumor | TCGA-AC-A3W6-01A-12R-A22I-13 | TCGA-AC-A3W6 |
| TCGA-BRCA | Primary Tumor | TCGA-AC-A3W7-01A-11R-A22I-13 | TCGA-AC-A3W7 |
| TCGA-BRCA | Primary Tumor | TCGA-AC-A3YI-01A-21R-A23A-13 | TCGA-AC-A3YI |
| TCGA-BRCA | Primary Tumor | TCGA-AC-A3YJ-01A-11R-A22V-13 | TCGA-AC-A3YJ |
| TCGA-BRCA | Primary Tumor | TCGA-AC-A4ZE-01A-11R-A41G-13 | TCGA-AC-A4ZE |
| TCGA-BRCA | Primary Tumor | TCGA-AC-A5EH-01A-11R-A28I-13 | TCGA-AC-A5EH |
| TCGA-BRCA | Primary Tumor | TCGA-AC-A5EI-01A-11R-A27U-13 | TCGA-AC-A5EI |
| TCGA-BRCA | Primary Tumor | TCGA-AC-A5XS-01A-11R-A29V-13 | TCGA-AC-A5XS |
| TCGA-BRCA | Primary Tumor | TCGA-AC-A5XU-01A-11R-A28I-13 | TCGA-AC-A5XU |
| TCGA-BRCA | Primary Tumor | TCGA-AC-A62V-01A-11R-A31S-13 | TCGA-AC-A62V |
| TCGA-BRCA | Primary Tumor | TCGA-AC-A62X-01A-11R-A29V-13 | TCGA-AC-A62X |
| TCGA-BRCA | Primary Tumor | TCGA-AC-A62Y-01A-11R-A29V-13 | TCGA-AC-A62Y |
| TCGA-BRCA | Primary Tumor | TCGA-AC-A6IV-01A-12R-A33A-13 | TCGA-AC-A6IV |
| TCGA-BRCA | Primary Tumor | TCGA-AC-A6IW-01A-12R-A33A-13 | TCGA-AC-A6IW |
| TCGA-BRCA | Primary Tumor | TCGA-AC-A6IX-01A-12R-A32K-13 | TCGA-AC-A6IX |
| TCGA-BRCA | Primary Tumor | TCGA-AC-A6NO-01A-12R-A33A-13 | TCGA-AC-A6NO |
| TCGA-BRCA | Primary Tumor | TCGA-AC-A7VB-01A-11R-A358-13 | TCGA-AC-A7VB |
| TCGA-BRCA | Primary Tumor | TCGA-AC-A7VC-01A-11R-A358-13 | TCGA-AC-A7VC |
| TCGA-BRCA | Primary Tumor | TCGA-AC-A8OP-01A-11R-A36A-13 | TCGA-AC-A8OP |
| TCGA-BRCA | Primary Tumor | TCGA-AC-A8OQ-01A-11R-A41G-13 | TCGA-AC-A8OQ |
| TCGA-BRCA | Primary Tumor | TCGA-AC-A8OR-01A-21R-A41G-13 | TCGA-AC-A8OR |
| TCGA-BRCA | Primary Tumor | TCGA-AC-A8OS-01A-12R-A41G-13 | TCGA-AC-A8OS |
| TCGA-BRCA | Primary Tumor | TCGA-AN-A03X-01A-21R-A010-13 | TCGA-AN-A03X |
| TCGA-BRCA | Primary Tumor | TCGA-AN-A03Y-01A-21R-A010-13 | TCGA-AN-A03Y |
| TCGA-BRCA | Primary Tumor | TCGA-AN-A041-01A-11R-A035-13 | TCGA-AN-A041 |
| TCGA-BRCA | Primary Tumor | TCGA-AN-A046-01A-21R-A035-13 | TCGA-AN-A046 |
| TCGA-BRCA | Primary Tumor | TCGA-AN-A049-01A-21R-A010-13 | TCGA-AN-A049 |
| TCGA-BRCA | Primary Tumor | TCGA-AN-A04A-01A-21R-A035-13 | TCGA-AN-A04A |
| TCGA-BRCA | Primary Tumor | TCGA-AN-A04C-01A-21R-A035-13 | TCGA-AN-A04C |
| TCGA-BRCA | Primary Tumor | TCGA-AN-A04D-01A-21R-A035-13 | TCGA-AN-A04D |
| TCGA-BRCA | Primary Tumor | TCGA-AN-A0AJ-01A-11R-A010-13 | TCGA-AN-A0AJ |
| TCGA-BRCA | Primary Tumor | TCGA-AN-A0AK-01A-21R-A010-13 | TCGA-AN-A0AK |
| TCGA-BRCA | Primary Tumor | TCGA-AN-A0AL-01A-11R-A010-13 | TCGA-AN-A0AL |
| TCGA-BRCA | Primary Tumor | TCGA-AN-A0AM-01A-11R-A035-13 | TCGA-AN-A0AM |
| TCGA-BRCA | Primary Tumor | TCGA-AN-A0AR-01A-11R-A010-13 | TCGA-AN-A0AR |
| TCGA-BRCA | Primary Tumor | TCGA-AN-A0AS-01A-11R-A010-13 | TCGA-AN-A0AS |
| TCGA-BRCA | Primary Tumor | TCGA-AN-A0AT-01A-11R-A035-13 | TCGA-AN-A0AT |
| TCGA-BRCA | Primary Tumor | TCGA-AN-A0FD-01A-11R-A035-13 | TCGA-AN-A0FD |
| TCGA-BRCA | Primary Tumor | TCGA-AN-A0FF-01A-11R-A035-13 | TCGA-AN-A0FF |
| TCGA-BRCA | Primary Tumor | TCGA-AN-A0FJ-01A-11R-A010-13 | TCGA-AN-A0FJ |
| TCGA-BRCA | Primary Tumor | TCGA-AN-A0FK-01A-11R-A035-13 | TCGA-AN-A0FK |
| TCGA-BRCA | Primary Tumor | TCGA-AN-A0FL-01A-11R-A035-13 | TCGA-AN-A0FL |
| TCGA-BRCA | Primary Tumor | TCGA-AN-A0FN-01A-11R-A035-13 | TCGA-AN-A0FN |
| TCGA-BRCA | Primary Tumor | TCGA-AN-A0FS-01A-11R-A035-13 | TCGA-AN-A0FS |
| TCGA-BRCA | Primary Tumor | TCGA-AN-A0FT-01A-11R-A035-13 | TCGA-AN-A0FT |
| TCGA-BRCA | Primary Tumor | TCGA-AN-A0FV-01A-11R-A010-13 | TCGA-AN-A0FV |
| TCGA-BRCA | Primary Tumor | TCGA-AN-A0FW-01A-11R-A035-13 | TCGA-AN-A0FW |
| TCGA-BRCA | Primary Tumor | TCGA-AN-A0FX-01A-11R-A035-13 | TCGA-AN-A0FX |
| TCGA-BRCA | Primary Tumor | TCGA-AN-A0FY-01A-11R-A035-13 | TCGA-AN-A0FY |
| TCGA-BRCA | Primary Tumor | TCGA-AN-A0FZ-01A-11R-A035-13 | TCGA-AN-A0FZ |



|           |               |                              |              |
|-----------|---------------|------------------------------|--------------|
| TCGA-BRCA | Primary Tumor | TCGA-AN-A0G0-01A-11R-A035-13 | TCGA-AN-A0G0 |
| TCGA-BRCA | Primary Tumor | TCGA-AN-A0XL-01A-11R-A10I-13 | TCGA-AN-A0XL |
| TCGA-BRCA | Primary Tumor | TCGA-AN-A0XN-01A-21R-A108-13 | TCGA-AN-A0XN |
| TCGA-BRCA | Primary Tumor | TCGA-AN-A0XO-01A-11R-A108-13 | TCGA-AN-A0XO |
| TCGA-BRCA | Primary Tumor | TCGA-AN-A0XP-01A-11R-A108-13 | TCGA-AN-A0XP |
| TCGA-BRCA | Primary Tumor | TCGA-AN-A0XR-01A-11R-A108-13 | TCGA-AN-A0XR |
| TCGA-BRCA | Primary Tumor | TCGA-AN-A0XS-01A-22R-A108-13 | TCGA-AN-A0XS |
| TCGA-BRCA | Primary Tumor | TCGA-AN-A0XT-01A-11R-A108-13 | TCGA-AN-A0XT |
| TCGA-BRCA | Primary Tumor | TCGA-AN-A0XU-01A-11R-A108-13 | TCGA-AN-A0XU |
| TCGA-BRCA | Primary Tumor | TCGA-AN-A0XV-01A-11R-A108-13 | TCGA-AN-A0XV |
| TCGA-BRCA | Primary Tumor | TCGA-AN-A0XW-01A-11R-A108-13 | TCGA-AN-A0XW |
| TCGA-BRCA | Primary Tumor | TCGA-AO-A03L-01A-41R-A057-13 | TCGA-AO-A03L |
| TCGA-BRCA | Primary Tumor | TCGA-AO-A03M-01B-11R-A10I-13 | TCGA-AO-A03M |
| TCGA-BRCA | Primary Tumor | TCGA-AO-A03N-01B-11R-A10I-13 | TCGA-AO-A03N |
| TCGA-BRCA | Primary Tumor | TCGA-AO-A03O-01A-11R-A010-13 | TCGA-AO-A03O |
| TCGA-BRCA | Primary Tumor | TCGA-AO-A03R-01A-21R-A035-13 | TCGA-AO-A03R |
| TCGA-BRCA | Primary Tumor | TCGA-AO-A03T-01A-21R-A035-13 | TCGA-AO-A03T |
| TCGA-BRCA | Primary Tumor | TCGA-AO-A03U-01B-21R-A10I-13 | TCGA-AO-A03U |
| TCGA-BRCA | Primary Tumor | TCGA-AO-A03V-01A-11R-A114-13 | TCGA-AO-A03V |
| TCGA-BRCA | Primary Tumor | TCGA-AO-A0J2-01A-11R-A035-13 | TCGA-AO-A0J2 |
| TCGA-BRCA | Primary Tumor | TCGA-AO-A0J3-01A-11R-A035-13 | TCGA-AO-A0J3 |
| TCGA-BRCA | Primary Tumor | TCGA-AO-A0J4-01A-11R-A035-13 | TCGA-AO-A0J4 |
| TCGA-BRCA | Primary Tumor | TCGA-AO-A0J5-01A-11R-A035-13 | TCGA-AO-A0J5 |
| TCGA-BRCA | Primary Tumor | TCGA-AO-A0J6-01A-11R-A035-13 | TCGA-AO-A0J6 |
| TCGA-BRCA | Primary Tumor | TCGA-AO-A0J7-01A-11R-A035-13 | TCGA-AO-A0J7 |
| TCGA-BRCA | Primary Tumor | TCGA-AO-A0J8-01A-21R-A035-13 | TCGA-AO-A0J8 |
| TCGA-BRCA | Primary Tumor | TCGA-AO-A0J9-01A-11R-A035-13 | TCGA-AO-A0J9 |
| TCGA-BRCA | Primary Tumor | TCGA-AO-A0JA-01A-11R-A057-13 | TCGA-AO-A0JA |
| TCGA-BRCA | Primary Tumor | TCGA-AO-A0JB-01A-11R-A057-13 | TCGA-AO-A0JB |
| TCGA-BRCA | Primary Tumor | TCGA-AO-A0JC-01A-11R-A057-13 | TCGA-AO-A0JC |
| TCGA-BRCA | Primary Tumor | TCGA-AO-A0JD-01A-11R-A057-13 | TCGA-AO-A0JD |
| TCGA-BRCA | Primary Tumor | TCGA-AO-A0JE-01A-11R-A057-13 | TCGA-AO-A0JE |
| TCGA-BRCA | Primary Tumor | TCGA-AO-A0JF-01A-11R-A057-13 | TCGA-AO-A0JF |
| TCGA-BRCA | Primary Tumor | TCGA-AO-A0JG-01A-31R-A085-13 | TCGA-AO-A0JG |
| TCGA-BRCA | Primary Tumor | TCGA-AO-A0JI-01A-21R-A057-13 | TCGA-AO-A0JI |
| TCGA-BRCA | Primary Tumor | TCGA-AO-A0JJ-01A-11R-A057-13 | TCGA-AO-A0JJ |
| TCGA-BRCA | Primary Tumor | TCGA-AO-A0JL-01A-11R-A057-13 | TCGA-AO-A0JL |
| TCGA-BRCA | Primary Tumor | TCGA-AO-A0JM-01A-21R-A057-13 | TCGA-AO-A0JM |
| TCGA-BRCA | Primary Tumor | TCGA-AO-A124-01A-11R-A10I-13 | TCGA-AO-A124 |
| TCGA-BRCA | Primary Tumor | TCGA-AO-A125-01A-11R-A10I-13 | TCGA-AO-A125 |
| TCGA-BRCA | Primary Tumor | TCGA-AO-A126-01A-11R-A10I-13 | TCGA-AO-A126 |
| TCGA-BRCA | Primary Tumor | TCGA-AO-A128-01A-11R-A10I-13 | TCGA-AO-A128 |
| TCGA-BRCA | Primary Tumor | TCGA-AO-A129-01A-21R-A10I-13 | TCGA-AO-A129 |
| TCGA-BRCA | Primary Tumor | TCGA-AO-A12A-01A-21R-A114-13 | TCGA-AO-A12A |
| TCGA-BRCA | Primary Tumor | TCGA-AO-A12B-01A-11R-A10I-13 | TCGA-AO-A12B |
| TCGA-BRCA | Primary Tumor | TCGA-AO-A12C-01A-11R-A10I-13 | TCGA-AO-A12C |
| TCGA-BRCA | Primary Tumor | TCGA-AO-A12D-01A-11R-A114-13 | TCGA-AO-A12D |
| TCGA-BRCA | Primary Tumor | TCGA-AO-A12E-01A-11R-A10I-13 | TCGA-AO-A12E |
| TCGA-BRCA | Primary Tumor | TCGA-AO-A12F-01A-11R-A114-13 | TCGA-AO-A12F |
| TCGA-BRCA | Primary Tumor | TCGA-AO-A12G-01A-11R-A10I-13 | TCGA-AO-A12G |
| TCGA-BRCA | Primary Tumor | TCGA-AO-A12H-01A-11R-A114-13 | TCGA-AO-A12H |
| TCGA-BRCA | Primary Tumor | TCGA-AO-A1KO-01A-31R-A13P-13 | TCGA-AO-A1KO |
| TCGA-BRCA | Primary Tumor | TCGA-AO-A1KP-01A-11R-A13P-13 | TCGA-AO-A1KP |
| TCGA-BRCA | Primary Tumor | TCGA-AO-A1KQ-01A-11R-A13P-13 | TCGA-AO-A1KQ |
| TCGA-BRCA | Primary Tumor | TCGA-AO-A1KR-01A-12R-A143-13 | TCGA-AO-A1KR |
| TCGA-BRCA | Primary Tumor | TCGA-AO-A1KS-01A-11R-A13P-13 | TCGA-AO-A1KS |
| TCGA-BRCA | Primary Tumor | TCGA-AO-A1KT-01A-11R-A13P-13 | TCGA-AO-A1KT |
| TCGA-BRCA | Primary Tumor | TCGA-AQ-A04H-01B-11R-A10I-13 | TCGA-AQ-A04H |
| TCGA-BRCA | Primary Tumor | TCGA-AQ-A04J-01A-02R-A035-13 | TCGA-AQ-A04J |

|           |               |                              |              |
|-----------|---------------|------------------------------|--------------|
| TCGA-BRCA | Primary Tumor | TCGA-AQ-A04L-01B-21R-A10I-13 | TCGA-AQ-A04L |
| TCGA-BRCA | Primary Tumor | TCGA-AQ-A0Y5-01A-11R-A14L-13 | TCGA-AQ-A0Y5 |
| TCGA-BRCA | Primary Tumor | TCGA-AQ-A1H2-01A-11R-A13P-13 | TCGA-AQ-A1H2 |
| TCGA-BRCA | Primary Tumor | TCGA-AQ-A1H3-01A-31R-A13P-13 | TCGA-AQ-A1H3 |
| TCGA-BRCA | Primary Tumor | TCGA-AQ-A54N-01A-11R-A25Z-13 | TCGA-AQ-A54N |
| TCGA-BRCA | Primary Tumor | TCGA-AQ-A54O-01A-11R-A25Z-13 | TCGA-AQ-A54O |
| TCGA-BRCA | Primary Tumor | TCGA-AQ-A7U7-01A-22R-A358-13 | TCGA-AQ-A7U7 |
| TCGA-BRCA | Primary Tumor | TCGA-AR-A0TP-01A-11R-A085-13 | TCGA-AR-A0TP |
| TCGA-BRCA | Primary Tumor | TCGA-AR-A0TQ-01A-11R-A085-13 | TCGA-AR-A0TQ |
| TCGA-BRCA | Primary Tumor | TCGA-AR-A0TR-01A-11R-A085-13 | TCGA-AR-A0TR |
| TCGA-BRCA | Primary Tumor | TCGA-AR-A0TS-01A-11R-A114-13 | TCGA-AR-A0TS |
| TCGA-BRCA | Primary Tumor | TCGA-AR-A0TT-01A-31R-A085-13 | TCGA-AR-A0TT |
| TCGA-BRCA | Primary Tumor | TCGA-AR-A0TV-01A-21R-A085-13 | TCGA-AR-A0TV |
| TCGA-BRCA | Primary Tumor | TCGA-AR-A0TX-01A-11R-A085-13 | TCGA-AR-A0TX |
| TCGA-BRCA | Primary Tumor | TCGA-AR-A0TY-01A-12R-A114-13 | TCGA-AR-A0TY |
| TCGA-BRCA | Primary Tumor | TCGA-AR-A0TZ-01A-12R-A085-13 | TCGA-AR-A0TZ |
| TCGA-BRCA | Primary Tumor | TCGA-AR-A0U2-01A-11R-A108-13 | TCGA-AR-A0U2 |
| TCGA-BRCA | Primary Tumor | TCGA-AR-A0U3-01A-11R-A108-13 | TCGA-AR-A0U3 |
| TCGA-BRCA | Primary Tumor | TCGA-AR-A0U4-01A-11R-A108-13 | TCGA-AR-A0U4 |
| TCGA-BRCA | Primary Tumor | TCGA-AR-A1AH-01A-11R-A12C-13 | TCGA-AR-A1AH |
| TCGA-BRCA | Primary Tumor | TCGA-AR-A1AI-01A-11R-A12O-13 | TCGA-AR-A1AI |
| TCGA-BRCA | Primary Tumor | TCGA-AR-A1AJ-01A-21R-A12O-13 | TCGA-AR-A1AJ |
| TCGA-BRCA | Primary Tumor | TCGA-AR-A1AK-01A-21R-A12O-13 | TCGA-AR-A1AK |
| TCGA-BRCA | Primary Tumor | TCGA-AR-A1AL-01A-21R-A12O-13 | TCGA-AR-A1AL |
| TCGA-BRCA | Primary Tumor | TCGA-AR-A1AM-01A-41R-A22I-13 | TCGA-AR-A1AM |
| TCGA-BRCA | Primary Tumor | TCGA-AR-A1AN-01A-11R-A12O-13 | TCGA-AR-A1AN |
| TCGA-BRCA | Primary Tumor | TCGA-AR-A1AO-01A-11R-A12O-13 | TCGA-AR-A1AO |
| TCGA-BRCA | Primary Tumor | TCGA-AR-A1AP-01A-11R-A12O-13 | TCGA-AR-A1AP |
| TCGA-BRCA | Primary Tumor | TCGA-AR-A1AQ-01A-11R-A12O-13 | TCGA-AR-A1AQ |
| TCGA-BRCA | Primary Tumor | TCGA-AR-A1AR-01A-31R-A136-13 | TCGA-AR-A1AR |
| TCGA-BRCA | Primary Tumor | TCGA-AR-A1AS-01A-11R-A12O-13 | TCGA-AR-A1AS |
| TCGA-BRCA | Primary Tumor | TCGA-AR-A1AT-01A-11R-A12O-13 | TCGA-AR-A1AT |
| TCGA-BRCA | Primary Tumor | TCGA-AR-A1AU-01A-11R-A12O-13 | TCGA-AR-A1AU |
| TCGA-BRCA | Primary Tumor | TCGA-AR-A1AV-01A-21R-A12O-13 | TCGA-AR-A1AV |
| TCGA-BRCA | Primary Tumor | TCGA-AR-A1AW-01A-21R-A12O-13 | TCGA-AR-A1AW |
| TCGA-BRCA | Primary Tumor | TCGA-AR-A1AX-01A-11R-A12O-13 | TCGA-AR-A1AX |
| TCGA-BRCA | Primary Tumor | TCGA-AR-A1AY-01A-21R-A12O-13 | TCGA-AR-A1AY |
| TCGA-BRCA | Primary Tumor | TCGA-AR-A24H-01A-11R-A168-13 | TCGA-AR-A24H |
| TCGA-BRCA | Primary Tumor | TCGA-AR-A24K-01A-11R-A168-13 | TCGA-AR-A24K |
| TCGA-BRCA | Primary Tumor | TCGA-AR-A24L-01A-11R-A168-13 | TCGA-AR-A24L |
| TCGA-BRCA | Primary Tumor | TCGA-AR-A24M-01A-11R-A168-13 | TCGA-AR-A24M |
| TCGA-BRCA | Primary Tumor | TCGA-AR-A24N-01A-11R-A168-13 | TCGA-AR-A24N |
| TCGA-BRCA | Primary Tumor | TCGA-AR-A24O-01A-11R-A168-13 | TCGA-AR-A24O |
| TCGA-BRCA | Primary Tumor | TCGA-AR-A24P-01A-11R-A168-13 | TCGA-AR-A24P |
| TCGA-BRCA | Primary Tumor | TCGA-AR-A24Q-01A-12R-A168-13 | TCGA-AR-A24Q |
| TCGA-BRCA | Primary Tumor | TCGA-AR-A24R-01A-11R-A168-13 | TCGA-AR-A24R |
| TCGA-BRCA | Primary Tumor | TCGA-AR-A24S-01A-11R-A168-13 | TCGA-AR-A24S |
| TCGA-BRCA | Primary Tumor | TCGA-AR-A24T-01A-11R-A168-13 | TCGA-AR-A24T |
| TCGA-BRCA | Primary Tumor | TCGA-AR-A24U-01A-11R-A168-13 | TCGA-AR-A24U |
| TCGA-BRCA | Primary Tumor | TCGA-AR-A24V-01A-21R-A168-13 | TCGA-AR-A24V |
| TCGA-BRCA | Primary Tumor | TCGA-AR-A24W-01A-11R-A168-13 | TCGA-AR-A24W |
| TCGA-BRCA | Primary Tumor | TCGA-AR-A24X-01A-11R-A168-13 | TCGA-AR-A24X |
| TCGA-BRCA | Primary Tumor | TCGA-AR-A24Z-01A-11R-A168-13 | TCGA-AR-A24Z |
| TCGA-BRCA | Primary Tumor | TCGA-AR-A250-01A-31R-A168-13 | TCGA-AR-A250 |
| TCGA-BRCA | Primary Tumor | TCGA-AR-A251-01A-12R-A168-13 | TCGA-AR-A251 |
| TCGA-BRCA | Primary Tumor | TCGA-AR-A252-01A-11R-A168-13 | TCGA-AR-A252 |
| TCGA-BRCA | Primary Tumor | TCGA-AR-A254-01A-21R-A168-13 | TCGA-AR-A254 |
| TCGA-BRCA | Primary Tumor | TCGA-AR-A255-01A-11R-A168-13 | TCGA-AR-A255 |
| TCGA-BRCA | Primary Tumor | TCGA-AR-A256-01A-11R-A168-13 | TCGA-AR-A256 |

|           |               |                              |              |
|-----------|---------------|------------------------------|--------------|
| TCGA-BRCA | Primary Tumor | TCGA-AR-A2LE-01A-11R-A17X-13 | TCGA-AR-A2LE |
| TCGA-BRCA | Primary Tumor | TCGA-AR-A2LH-01A-31R-A18L-13 | TCGA-AR-A2LH |
| TCGA-BRCA | Primary Tumor | TCGA-AR-A2LJ-01A-12R-A19V-13 | TCGA-AR-A2LJ |
| TCGA-BRCA | Primary Tumor | TCGA-AR-A2LK-01A-11R-A17X-13 | TCGA-AR-A2LK |
| TCGA-BRCA | Primary Tumor | TCGA-AR-A2LL-01A-11R-A17X-13 | TCGA-AR-A2LL |
| TCGA-BRCA | Primary Tumor | TCGA-AR-A2LM-01A-11R-A17X-13 | TCGA-AR-A2LM |
| TCGA-BRCA | Primary Tumor | TCGA-AR-A2LN-01A-21R-A18L-13 | TCGA-AR-A2LN |
| TCGA-BRCA | Primary Tumor | TCGA-AR-A2LO-01A-31R-A18L-13 | TCGA-AR-A2LO |
| TCGA-BRCA | Primary Tumor | TCGA-AR-A2LQ-01A-22R-A18L-13 | TCGA-AR-A2LQ |
| TCGA-BRCA | Primary Tumor | TCGA-AR-A2LR-01A-12R-A18L-13 | TCGA-AR-A2LR |
| TCGA-BRCA | Primary Tumor | TCGA-AR-A5QM-01A-11R-A27U-13 | TCGA-AR-A5QM |
| TCGA-BRCA | Primary Tumor | TCGA-AR-A5QN-01A-12R-A28I-13 | TCGA-AR-A5QN |
| TCGA-BRCA | Primary Tumor | TCGA-AR-A5QP-01A-11R-A28I-13 | TCGA-AR-A5QP |
| TCGA-BRCA | Primary Tumor | TCGA-AR-A5QQ-01A-11R-A28I-13 | TCGA-AR-A5QQ |
| TCGA-BRCA | Primary Tumor | TCGA-B6-A0I1-01A-11R-A21U-13 | TCGA-B6-A0I1 |
| TCGA-BRCA | Primary Tumor | TCGA-B6-A0I2-01A-11R-A035-13 | TCGA-B6-A0I2 |
| TCGA-BRCA | Primary Tumor | TCGA-B6-A0I5-01A-11R-A035-13 | TCGA-B6-A0I5 |
| TCGA-BRCA | Primary Tumor | TCGA-B6-A0I6-01A-11R-A035-13 | TCGA-B6-A0I6 |
| TCGA-BRCA | Primary Tumor | TCGA-B6-A0I8-01A-11R-A035-13 | TCGA-B6-A0I8 |
| TCGA-BRCA | Primary Tumor | TCGA-B6-A0I9-01A-11R-A035-13 | TCGA-B6-A0I9 |
| TCGA-BRCA | Primary Tumor | TCGA-B6-A0IA-01A-11R-A035-13 | TCGA-B6-A0IA |
| TCGA-BRCA | Primary Tumor | TCGA-B6-A0IB-01A-11R-A035-13 | TCGA-B6-A0IB |
| TCGA-BRCA | Primary Tumor | TCGA-B6-A0IC-01A-11R-A035-13 | TCGA-B6-A0IC |
| TCGA-BRCA | Primary Tumor | TCGA-B6-A0IE-01A-11R-A035-13 | TCGA-B6-A0IE |
| TCGA-BRCA | Primary Tumor | TCGA-B6-A0IG-01A-11R-A035-13 | TCGA-B6-A0IG |
| TCGA-BRCA | Primary Tumor | TCGA-B6-A0IH-01A-11R-A114-13 | TCGA-B6-A0IH |
| TCGA-BRCA | Primary Tumor | TCGA-B6-A0IJ-01A-11R-A035-13 | TCGA-B6-A0IJ |
| TCGA-BRCA | Primary Tumor | TCGA-B6-A0IK-01A-12R-A057-13 | TCGA-B6-A0IK |
| TCGA-BRCA | Primary Tumor | TCGA-B6-A0IM-01A-11R-A035-13 | TCGA-B6-A0IM |
| TCGA-BRCA | Primary Tumor | TCGA-B6-A0IN-01A-11R-A035-13 | TCGA-B6-A0IN |
| TCGA-BRCA | Primary Tumor | TCGA-B6-A0IO-01A-11R-A035-13 | TCGA-B6-A0IO |
| TCGA-BRCA | Primary Tumor | TCGA-B6-A0IP-01A-11R-A035-13 | TCGA-B6-A0IP |
| TCGA-BRCA | Primary Tumor | TCGA-B6-A0IQ-01A-11R-A035-13 | TCGA-B6-A0IQ |
| TCGA-BRCA | Primary Tumor | TCGA-B6-A0RE-01A-11R-A057-13 | TCGA-B6-A0RE |
| TCGA-BRCA | Primary Tumor | TCGA-B6-A0RG-01A-11R-A057-13 | TCGA-B6-A0RG |
| TCGA-BRCA | Primary Tumor | TCGA-B6-A0RH-01A-21R-A114-13 | TCGA-B6-A0RH |
| TCGA-BRCA | Primary Tumor | TCGA-B6-A0RI-01A-11R-A057-13 | TCGA-B6-A0RI |
| TCGA-BRCA | Primary Tumor | TCGA-B6-A0RL-01A-11R-A085-13 | TCGA-B6-A0RL |
| TCGA-BRCA | Primary Tumor | TCGA-B6-A0RM-01A-11R-A085-13 | TCGA-B6-A0RM |
| TCGA-BRCA | Primary Tumor | TCGA-B6-A0RN-01A-12R-A085-13 | TCGA-B6-A0RN |
| TCGA-BRCA | Primary Tumor | TCGA-B6-A0RO-01A-22R-A085-13 | TCGA-B6-A0RO |
| TCGA-BRCA | Primary Tumor | TCGA-B6-A0RP-01A-21R-A085-13 | TCGA-B6-A0RP |
| TCGA-BRCA | Primary Tumor | TCGA-B6-A0RQ-01A-11R-A114-13 | TCGA-B6-A0RQ |
| TCGA-BRCA | Primary Tumor | TCGA-B6-A0RS-01A-11R-A085-13 | TCGA-B6-A0RS |
| TCGA-BRCA | Primary Tumor | TCGA-B6-A0RT-01A-21R-A085-13 | TCGA-B6-A0RT |
| TCGA-BRCA | Primary Tumor | TCGA-B6-A0RU-01A-11R-A085-13 | TCGA-B6-A0RU |
| TCGA-BRCA | Primary Tumor | TCGA-B6-A0RV-01A-11R-A085-13 | TCGA-B6-A0RV |
| TCGA-BRCA | Primary Tumor | TCGA-B6-A0WS-01A-11R-A114-13 | TCGA-B6-A0WS |
| TCGA-BRCA | Primary Tumor | TCGA-B6-A0WT-01A-11R-A108-13 | TCGA-B6-A0WT |
| TCGA-BRCA | Primary Tumor | TCGA-B6-A0WV-01A-11R-A108-13 | TCGA-B6-A0WV |
| TCGA-BRCA | Primary Tumor | TCGA-B6-A0WW-01A-11R-A108-13 | TCGA-B6-A0WW |
| TCGA-BRCA | Primary Tumor | TCGA-B6-A0WX-01A-11R-A108-13 | TCGA-B6-A0WX |
| TCGA-BRCA | Primary Tumor | TCGA-B6-A0WY-01A-11R-A108-13 | TCGA-B6-A0WY |
| TCGA-BRCA | Primary Tumor | TCGA-B6-A0WZ-01A-11R-A108-13 | TCGA-B6-A0WZ |
| TCGA-BRCA | Primary Tumor | TCGA-B6-A0X0-01A-21R-A114-13 | TCGA-B6-A0X0 |
| TCGA-BRCA | Primary Tumor | TCGA-B6-A0X4-01A-11R-A108-13 | TCGA-B6-A0X4 |
| TCGA-BRCA | Primary Tumor | TCGA-B6-A0X5-01A-21R-A108-13 | TCGA-B6-A0X5 |
| TCGA-BRCA | Primary Tumor | TCGA-B6-A0X7-01A-11R-A10I-13 | TCGA-B6-A0X7 |
| TCGA-BRCA | Primary Tumor | TCGA-B6-A1KC-01A-11R-A13P-13 | TCGA-B6-A1KC |

|           |               |                              |              |
|-----------|---------------|------------------------------|--------------|
| TCGA-BRCA | Primary Tumor | TCGA-B6-A1KC-01B-11R-A156-13 | TCGA-B6-A1KC |
| TCGA-BRCA | Primary Tumor | TCGA-B6-A1KF-01A-11R-A13P-13 | TCGA-B6-A1KF |
| TCGA-BRCA | Primary Tumor | TCGA-B6-A1KI-01A-11R-A14L-13 | TCGA-B6-A1KI |
| TCGA-BRCA | Primary Tumor | TCGA-B6-A1KN-01A-11R-A13P-13 | TCGA-B6-A1KN |
| TCGA-BRCA | Primary Tumor | TCGA-B6-A2IU-01A-32R-A18L-13 | TCGA-B6-A2IU |
| TCGA-BRCA | Primary Tumor | TCGA-B6-A3ZX-01A-11R-A23A-13 | TCGA-B6-A3ZX |
| TCGA-BRCA | Primary Tumor | TCGA-B6-A400-01A-11R-A23A-13 | TCGA-B6-A400 |
| TCGA-BRCA | Primary Tumor | TCGA-B6-A401-01A-11R-A23A-13 | TCGA-B6-A401 |
| TCGA-BRCA | Primary Tumor | TCGA-B6-A402-01A-11R-A23A-13 | TCGA-B6-A402 |
| TCGA-BRCA | Primary Tumor | TCGA-B6-A408-01A-12R-A24J-13 | TCGA-B6-A408 |
| TCGA-BRCA | Primary Tumor | TCGA-B6-A409-01A-11R-A24J-13 | TCGA-B6-A409 |
| TCGA-BRCA | Primary Tumor | TCGA-B6-A40B-01A-11R-A23A-13 | TCGA-B6-A40B |
| TCGA-BRCA | Primary Tumor | TCGA-B6-A40C-01A-11R-A23A-13 | TCGA-B6-A40C |
| TCGA-BRCA | Primary Tumor | TCGA-BH-A0AU-01A-11R-A12O-13 | TCGA-BH-A0AU |
| TCGA-BRCA | Primary Tumor | TCGA-BH-A0AV-01A-31R-A114-13 | TCGA-BH-A0AV |
| TCGA-BRCA | Primary Tumor | TCGA-BH-A0AW-01A-11R-A057-13 | TCGA-BH-A0AW |
| TCGA-BRCA | Primary Tumor | TCGA-BH-A0AY-01A-21R-A010-13 | TCGA-BH-A0AY |
| TCGA-BRCA | Primary Tumor | TCGA-BH-A0AZ-01A-21R-A12O-13 | TCGA-BH-A0AZ |
| TCGA-BRCA | Primary Tumor | TCGA-BH-A0B0-01A-21R-A114-13 | TCGA-BH-A0B0 |
| TCGA-BRCA | Primary Tumor | TCGA-BH-A0B1-01A-12R-A057-13 | TCGA-BH-A0B1 |
| TCGA-BRCA | Primary Tumor | TCGA-BH-A0B2-01A-11R-A10I-13 | TCGA-BH-A0B2 |
| TCGA-BRCA | Primary Tumor | TCGA-BH-A0B3-01A-11R-A057-13 | TCGA-BH-A0B3 |
| TCGA-BRCA | Primary Tumor | TCGA-BH-A0B4-01A-11R-A010-13 | TCGA-BH-A0B4 |
| TCGA-BRCA | Primary Tumor | TCGA-BH-A0B5-01A-11R-A12O-13 | TCGA-BH-A0B5 |
| TCGA-BRCA | Primary Tumor | TCGA-BH-A0B6-01A-11R-A19V-13 | TCGA-BH-A0B6 |
| TCGA-BRCA | Primary Tumor | TCGA-BH-A0B7-01A-12R-A114-13 | TCGA-BH-A0B7 |
| TCGA-BRCA | Primary Tumor | TCGA-BH-A0B8-01A-21R-A057-13 | TCGA-BH-A0B8 |
| TCGA-BRCA | Primary Tumor | TCGA-BH-A0B9-01A-11R-A057-13 | TCGA-BH-A0B9 |
| TCGA-BRCA | Primary Tumor | TCGA-BH-A0BA-01A-11R-A057-13 | TCGA-BH-A0BA |
| TCGA-BRCA | Primary Tumor | TCGA-BH-A0BC-01A-22R-A085-13 | TCGA-BH-A0BC |
| TCGA-BRCA | Primary Tumor | TCGA-BH-A0BD-01A-11R-A035-13 | TCGA-BH-A0BD |
| TCGA-BRCA | Primary Tumor | TCGA-BH-A0BF-01A-21R-A12O-13 | TCGA-BH-A0BF |
| TCGA-BRCA | Primary Tumor | TCGA-BH-A0BG-01A-11R-A114-13 | TCGA-BH-A0BG |
| TCGA-BRCA | Primary Tumor | TCGA-BH-A0BJ-01A-11R-A057-13 | TCGA-BH-A0BJ |
| TCGA-BRCA | Primary Tumor | TCGA-BH-A0BL-01A-11R-A114-13 | TCGA-BH-A0BL |
| TCGA-BRCA | Primary Tumor | TCGA-BH-A0BM-01A-11R-A057-13 | TCGA-BH-A0BM |
| TCGA-BRCA | Primary Tumor | TCGA-BH-A0BO-01A-23R-A12C-13 | TCGA-BH-A0BO |
| TCGA-BRCA | Primary Tumor | TCGA-BH-A0BP-01A-11R-A114-13 | TCGA-BH-A0BP |
| TCGA-BRCA | Primary Tumor | TCGA-BH-A0BQ-01A-21R-A114-13 | TCGA-BH-A0BQ |
| TCGA-BRCA | Primary Tumor | TCGA-BH-A0BR-01A-21R-A114-13 | TCGA-BH-A0BR |
| TCGA-BRCA | Primary Tumor | TCGA-BH-A0BS-01A-11R-A12O-13 | TCGA-BH-A0BS |
| TCGA-BRCA | Primary Tumor | TCGA-BH-A0BT-01A-11R-A12O-13 | TCGA-BH-A0BT |
| TCGA-BRCA | Primary Tumor | TCGA-BH-A0BV-01A-11R-A010-13 | TCGA-BH-A0BV |
| TCGA-BRCA | Primary Tumor | TCGA-BH-A0BW-01A-11R-A114-13 | TCGA-BH-A0BW |
| TCGA-BRCA | Primary Tumor | TCGA-BH-A0BZ-01A-31R-A12O-13 | TCGA-BH-A0BZ |
| TCGA-BRCA | Primary Tumor | TCGA-BH-A0C0-01A-21R-A057-13 | TCGA-BH-A0C0 |
| TCGA-BRCA | Primary Tumor | TCGA-BH-A0C1-01B-11R-A12C-13 | TCGA-BH-A0C1 |
| TCGA-BRCA | Primary Tumor | TCGA-BH-A0C3-01A-21R-A12O-13 | TCGA-BH-A0C3 |
| TCGA-BRCA | Primary Tumor | TCGA-BH-A0C7-01B-11R-A114-13 | TCGA-BH-A0C7 |
| TCGA-BRCA | Primary Tumor | TCGA-BH-A0DD-01A-31R-A12O-13 | TCGA-BH-A0DD |
| TCGA-BRCA | Primary Tumor | TCGA-BH-A0DE-01A-11R-A114-13 | TCGA-BH-A0DE |
| TCGA-BRCA | Primary Tumor | TCGA-BH-A0DG-01A-21R-A12O-13 | TCGA-BH-A0DG |
| TCGA-BRCA | Primary Tumor | TCGA-BH-A0DH-01A-11R-A085-13 | TCGA-BH-A0DH |
| TCGA-BRCA | Primary Tumor | TCGA-BH-A0DI-01A-21R-A12O-13 | TCGA-BH-A0DI |
| TCGA-BRCA | Primary Tumor | TCGA-BH-A0DK-01A-21R-A057-13 | TCGA-BH-A0DK |
| TCGA-BRCA | Primary Tumor | TCGA-BH-A0DL-01A-11R-A114-13 | TCGA-BH-A0DL |
| TCGA-BRCA | Primary Tumor | TCGA-BH-A0DO-01B-11R-A12C-13 | TCGA-BH-A0DO |
| TCGA-BRCA | Primary Tumor | TCGA-BH-A0DP-01A-21R-A057-13 | TCGA-BH-A0DP |
| TCGA-BRCA | Primary Tumor | TCGA-BH-A0DQ-01A-11R-A085-13 | TCGA-BH-A0DQ |

|           |               |                              |              |
|-----------|---------------|------------------------------|--------------|
| TCGA-BRCA | Primary Tumor | TCGA-BH-A0DS-01A-11R-A057-13 | TCGA-BH-A0DS |
| TCGA-BRCA | Primary Tumor | TCGA-BH-A0DT-01A-21R-A12C-13 | TCGA-BH-A0DT |
| TCGA-BRCA | Primary Tumor | TCGA-BH-A0DV-01A-21R-A12O-13 | TCGA-BH-A0DV |
| TCGA-BRCA | Primary Tumor | TCGA-BH-A0DX-01A-11R-A114-13 | TCGA-BH-A0DX |
| TCGA-BRCA | Primary Tumor | TCGA-BH-A0DZ-01A-11R-A010-13 | TCGA-BH-A0DZ |
| TCGA-BRCA | Primary Tumor | TCGA-BH-A0E0-01A-11R-A057-13 | TCGA-BH-A0E0 |
| TCGA-BRCA | Primary Tumor | TCGA-BH-A0E1-01A-11R-A057-13 | TCGA-BH-A0E1 |
| TCGA-BRCA | Primary Tumor | TCGA-BH-A0E2-01A-11R-A057-13 | TCGA-BH-A0E2 |
| TCGA-BRCA | Primary Tumor | TCGA-BH-A0E6-01A-11R-A035-13 | TCGA-BH-A0E6 |
| TCGA-BRCA | Primary Tumor | TCGA-BH-A0E7-01A-11R-A035-13 | TCGA-BH-A0E7 |
| TCGA-BRCA | Primary Tumor | TCGA-BH-A0E9-01B-11R-A114-13 | TCGA-BH-A0E9 |
| TCGA-BRCA | Primary Tumor | TCGA-BH-A0EA-01A-11R-A114-13 | TCGA-BH-A0EA |
| TCGA-BRCA | Primary Tumor | TCGA-BH-A0EE-01A-11R-A035-13 | TCGA-BH-A0EE |
| TCGA-BRCA | Primary Tumor | TCGA-BH-A0EI-01A-11R-A114-13 | TCGA-BH-A0EI |
| TCGA-BRCA | Primary Tumor | TCGA-BH-A0GY-01A-11R-A057-13 | TCGA-BH-A0GY |
| TCGA-BRCA | Primary Tumor | TCGA-BH-A0GZ-01A-11R-A057-13 | TCGA-BH-A0GZ |
| TCGA-BRCA | Primary Tumor | TCGA-BH-A0H0-01A-11R-A057-13 | TCGA-BH-A0H0 |
| TCGA-BRCA | Primary Tumor | TCGA-BH-A0H3-01A-11R-A12O-13 | TCGA-BH-A0H3 |
| TCGA-BRCA | Primary Tumor | TCGA-BH-A0H5-01A-21R-A114-13 | TCGA-BH-A0H5 |
| TCGA-BRCA | Primary Tumor | TCGA-BH-A0H6-01A-21R-A057-13 | TCGA-BH-A0H6 |
| TCGA-BRCA | Primary Tumor | TCGA-BH-A0H7-01A-13R-A057-13 | TCGA-BH-A0H7 |
| TCGA-BRCA | Primary Tumor | TCGA-BH-A0H9-01A-11R-A057-13 | TCGA-BH-A0H9 |
| TCGA-BRCA | Primary Tumor | TCGA-BH-A0HA-01A-11R-A12O-13 | TCGA-BH-A0HA |
| TCGA-BRCA | Primary Tumor | TCGA-BH-A0HB-01A-11R-A057-13 | TCGA-BH-A0HB |
| TCGA-BRCA | Primary Tumor | TCGA-BH-A0HF-01A-11R-A057-13 | TCGA-BH-A0HF |
| TCGA-BRCA | Primary Tumor | TCGA-BH-A0HI-01A-11R-A085-13 | TCGA-BH-A0HI |
| TCGA-BRCA | Primary Tumor | TCGA-BH-A0HK-01A-11R-A057-13 | TCGA-BH-A0HK |
| TCGA-BRCA | Primary Tumor | TCGA-BH-A0HL-01A-11R-A10V-13 | TCGA-BH-A0HL |
| TCGA-BRCA | Primary Tumor | TCGA-BH-A0HN-01A-11R-A10V-13 | TCGA-BH-A0HN |
| TCGA-BRCA | Primary Tumor | TCGA-BH-A0HO-01A-11R-A035-13 | TCGA-BH-A0HO |
| TCGA-BRCA | Primary Tumor | TCGA-BH-A0HP-01A-12R-A085-13 | TCGA-BH-A0HP |
| TCGA-BRCA | Primary Tumor | TCGA-BH-A0HQ-01A-11R-A035-13 | TCGA-BH-A0HQ |
| TCGA-BRCA | Primary Tumor | TCGA-BH-A0HU-01A-11R-A035-13 | TCGA-BH-A0HU |
| TCGA-BRCA | Primary Tumor | TCGA-BH-A0HW-01A-11R-A035-13 | TCGA-BH-A0HW |
| TCGA-BRCA | Primary Tumor | TCGA-BH-A0HX-01A-21R-A057-13 | TCGA-BH-A0HX |
| TCGA-BRCA | Primary Tumor | TCGA-BH-A0HY-01A-11R-A057-13 | TCGA-BH-A0HY |
| TCGA-BRCA | Primary Tumor | TCGA-BH-A0RX-01A-21R-A085-13 | TCGA-BH-A0RX |
| TCGA-BRCA | Primary Tumor | TCGA-BH-A0W3-01A-11R-A108-13 | TCGA-BH-A0W3 |
| TCGA-BRCA | Primary Tumor | TCGA-BH-A0W4-01A-11R-A108-13 | TCGA-BH-A0W4 |
| TCGA-BRCA | Primary Tumor | TCGA-BH-A0W5-01A-11R-A108-13 | TCGA-BH-A0W5 |
| TCGA-BRCA | Primary Tumor | TCGA-BH-A0W7-01A-11R-A114-13 | TCGA-BH-A0W7 |
| TCGA-BRCA | Primary Tumor | TCGA-BH-A0WA-01A-11R-A108-13 | TCGA-BH-A0WA |
| TCGA-BRCA | Primary Tumor | TCGA-BH-A18F-01A-11R-A12C-13 | TCGA-BH-A18F |
| TCGA-BRCA | Primary Tumor | TCGA-BH-A18G-01A-11R-A12C-13 | TCGA-BH-A18G |
| TCGA-BRCA | Primary Tumor | TCGA-BH-A18H-01A-11R-A12C-13 | TCGA-BH-A18H |
| TCGA-BRCA | Primary Tumor | TCGA-BH-A18I-01A-11R-A12C-13 | TCGA-BH-A18I |
| TCGA-BRCA | Primary Tumor | TCGA-BH-A18J-01A-11R-A12C-13 | TCGA-BH-A18J |
| TCGA-BRCA | Primary Tumor | TCGA-BH-A18K-01A-11R-A12C-13 | TCGA-BH-A18K |
| TCGA-BRCA | Primary Tumor | TCGA-BH-A18L-01A-32R-A12C-13 | TCGA-BH-A18L |
| TCGA-BRCA | Primary Tumor | TCGA-BH-A18M-01A-11R-A12C-13 | TCGA-BH-A18M |
| TCGA-BRCA | Primary Tumor | TCGA-BH-A18N-01A-11R-A12C-13 | TCGA-BH-A18N |
| TCGA-BRCA | Primary Tumor | TCGA-BH-A18P-01A-11R-A12C-13 | TCGA-BH-A18P |
| TCGA-BRCA | Primary Tumor | TCGA-BH-A18Q-01A-12R-A12C-13 | TCGA-BH-A18Q |
| TCGA-BRCA | Primary Tumor | TCGA-BH-A18R-01A-11R-A12C-13 | TCGA-BH-A18R |
| TCGA-BRCA | Primary Tumor | TCGA-BH-A18S-01A-11R-A12C-13 | TCGA-BH-A18S |
| TCGA-BRCA | Primary Tumor | TCGA-BH-A18T-01A-11R-A12C-13 | TCGA-BH-A18T |
| TCGA-BRCA | Primary Tumor | TCGA-BH-A18U-01A-21R-A12C-13 | TCGA-BH-A18U |
| TCGA-BRCA | Primary Tumor | TCGA-BH-A18V-01A-11R-A12C-13 | TCGA-BH-A18V |
| TCGA-BRCA | Primary Tumor | TCGA-BH-A1EN-01A-11R-A13P-13 | TCGA-BH-A1EN |

|           |               |                              |              |
|-----------|---------------|------------------------------|--------------|
| TCGA-BRCA | Primary Tumor | TCGA-BH-A1EO-01A-11R-A136-13 | TCGA-BH-A1EO |
| TCGA-BRCA | Primary Tumor | TCGA-BH-A1ES-01A-11R-A136-13 | TCGA-BH-A1ES |
| TCGA-BRCA | Primary Tumor | TCGA-BH-A1ET-01A-11R-A136-13 | TCGA-BH-A1ET |
| TCGA-BRCA | Primary Tumor | TCGA-BH-A1EU-01A-11R-A136-13 | TCGA-BH-A1EU |
| TCGA-BRCA | Primary Tumor | TCGA-BH-A1EV-01A-11R-A136-13 | TCGA-BH-A1EV |
| TCGA-BRCA | Primary Tumor | TCGA-BH-A1EW-01A-11R-A136-13 | TCGA-BH-A1EW |
| TCGA-BRCA | Primary Tumor | TCGA-BH-A1EX-01A-11R-A13P-13 | TCGA-BH-A1EX |
| TCGA-BRCA | Primary Tumor | TCGA-BH-A1EY-01A-11R-A13P-13 | TCGA-BH-A1EY |
| TCGA-BRCA | Primary Tumor | TCGA-BH-A1F0-01A-11R-A136-13 | TCGA-BH-A1F0 |
| TCGA-BRCA | Primary Tumor | TCGA-BH-A1F2-01A-31R-A13P-13 | TCGA-BH-A1F2 |
| TCGA-BRCA | Primary Tumor | TCGA-BH-A1F5-01A-12R-A13P-13 | TCGA-BH-A1F5 |
| TCGA-BRCA | Primary Tumor | TCGA-BH-A1F6-01A-11R-A13P-13 | TCGA-BH-A1F6 |
| TCGA-BRCA | Primary Tumor | TCGA-BH-A1F8-01A-11R-A13P-13 | TCGA-BH-A1F8 |
| TCGA-BRCA | Primary Tumor | TCGA-BH-A1FB-01A-11R-A13P-13 | TCGA-BH-A1FB |
| TCGA-BRCA | Primary Tumor | TCGA-BH-A1FC-01A-11R-A13P-13 | TCGA-BH-A1FC |
| TCGA-BRCA | Primary Tumor | TCGA-BH-A1FE-01A-11R-A13P-13 | TCGA-BH-A1FE |
| TCGA-BRCA | Primary Tumor | TCGA-BH-A1FG-01A-11R-A13P-13 | TCGA-BH-A1FG |
| TCGA-BRCA | Primary Tumor | TCGA-BH-A1FH-01A-12R-A13P-13 | TCGA-BH-A1FH |
| TCGA-BRCA | Primary Tumor | TCGA-BH-A1FJ-01A-11R-A13P-13 | TCGA-BH-A1FJ |
| TCGA-BRCA | Primary Tumor | TCGA-BH-A1FL-01A-11R-A13P-13 | TCGA-BH-A1FL |
| TCGA-BRCA | Primary Tumor | TCGA-BH-A1FM-01A-11R-A13P-13 | TCGA-BH-A1FM |
| TCGA-BRCA | Primary Tumor | TCGA-BH-A1FN-01A-11R-A13P-13 | TCGA-BH-A1FN |
| TCGA-BRCA | Primary Tumor | TCGA-BH-A1FR-01A-11R-A13P-13 | TCGA-BH-A1FR |
| TCGA-BRCA | Primary Tumor | TCGA-BH-A1FU-01A-11R-A14C-13 | TCGA-BH-A1FU |
| TCGA-BRCA | Primary Tumor | TCGA-BH-A201-01A-11R-A14L-13 | TCGA-BH-A201 |
| TCGA-BRCA | Primary Tumor | TCGA-BH-A202-01A-11R-A14L-13 | TCGA-BH-A202 |
| TCGA-BRCA | Primary Tumor | TCGA-BH-A203-01A-12R-A168-13 | TCGA-BH-A203 |
| TCGA-BRCA | Primary Tumor | TCGA-BH-A204-01A-11R-A156-13 | TCGA-BH-A204 |
| TCGA-BRCA | Primary Tumor | TCGA-BH-A208-01A-11R-A156-13 | TCGA-BH-A208 |
| TCGA-BRCA | Primary Tumor | TCGA-BH-A209-01A-11R-A156-13 | TCGA-BH-A209 |
| TCGA-BRCA | Primary Tumor | TCGA-BH-A28O-01A-11R-A22I-13 | TCGA-BH-A28O |
| TCGA-BRCA | Primary Tumor | TCGA-BH-A28Q-01A-11R-A16E-13 | TCGA-BH-A28Q |
| TCGA-BRCA | Primary Tumor | TCGA-BH-A2L8-01A-11R-A18L-13 | TCGA-BH-A2L8 |
| TCGA-BRCA | Primary Tumor | TCGA-BH-A42T-01A-11R-A24J-13 | TCGA-BH-A42T |
| TCGA-BRCA | Primary Tumor | TCGA-BH-A42U-01A-12R-A24J-13 | TCGA-BH-A42U |
| TCGA-BRCA | Primary Tumor | TCGA-BH-A42V-01A-11R-A24J-13 | TCGA-BH-A42V |
| TCGA-BRCA | Primary Tumor | TCGA-BH-A5IZ-01A-11R-A27U-13 | TCGA-BH-A5IZ |
| TCGA-BRCA | Primary Tumor | TCGA-BH-A5J0-01A-11R-A27U-13 | TCGA-BH-A5J0 |
| TCGA-BRCA | Primary Tumor | TCGA-BH-A6R8-01A-21R-A33A-13 | TCGA-BH-A6R8 |
| TCGA-BRCA | Primary Tumor | TCGA-BH-A6R9-01A-21R-A32K-13 | TCGA-BH-A6R9 |
| TCGA-BRCA | Primary Tumor | TCGA-BH-A8FY-01A-11R-A36A-13 | TCGA-BH-A8FY |
| TCGA-BRCA | Primary Tumor | TCGA-BH-A8FZ-01A-11R-A358-13 | TCGA-BH-A8FZ |
| TCGA-BRCA | Primary Tumor | TCGA-BH-A8G0-01A-11R-A358-13 | TCGA-BH-A8G0 |
| TCGA-BRCA | Primary Tumor | TCGA-BH-AB28-01A-31R-A41G-13 | TCGA-BH-AB28 |
| TCGA-BRCA | Primary Tumor | TCGA-C8-A12K-01A-21R-A114-13 | TCGA-C8-A12K |
| TCGA-BRCA | Primary Tumor | TCGA-C8-A12L-01A-11R-A114-13 | TCGA-C8-A12L |
| TCGA-BRCA | Primary Tumor | TCGA-C8-A12M-01A-11R-A114-13 | TCGA-C8-A12M |
| TCGA-BRCA | Primary Tumor | TCGA-C8-A12N-01A-11R-A114-13 | TCGA-C8-A12N |
| TCGA-BRCA | Primary Tumor | TCGA-C8-A12O-01A-11R-A114-13 | TCGA-C8-A12O |
| TCGA-BRCA | Primary Tumor | TCGA-C8-A12P-01A-11R-A114-13 | TCGA-C8-A12P |
| TCGA-BRCA | Primary Tumor | TCGA-C8-A12Q-01A-11R-A114-13 | TCGA-C8-A12Q |
| TCGA-BRCA | Primary Tumor | TCGA-C8-A12T-01A-11R-A114-13 | TCGA-C8-A12T |
| TCGA-BRCA | Primary Tumor | TCGA-C8-A12U-01A-11R-A114-13 | TCGA-C8-A12U |
| TCGA-BRCA | Primary Tumor | TCGA-C8-A12V-01A-11R-A114-13 | TCGA-C8-A12V |
| TCGA-BRCA | Primary Tumor | TCGA-C8-A12W-01A-11R-A114-13 | TCGA-C8-A12W |
| TCGA-BRCA | Primary Tumor | TCGA-C8-A12X-01A-11R-A114-13 | TCGA-C8-A12X |
| TCGA-BRCA | Primary Tumor | TCGA-C8-A12Y-01A-11R-A12C-13 | TCGA-C8-A12Y |
| TCGA-BRCA | Primary Tumor | TCGA-C8-A12Z-01A-11R-A114-13 | TCGA-C8-A12Z |
| TCGA-BRCA | Primary Tumor | TCGA-C8-A130-01A-31R-A114-13 | TCGA-C8-A130 |

|           |               |                              |              |
|-----------|---------------|------------------------------|--------------|
| TCGA-BRCA | Primary Tumor | TCGA-C8-A131-01A-11R-A114-13 | TCGA-C8-A131 |
| TCGA-BRCA | Primary Tumor | TCGA-C8-A132-01A-31R-A114-13 | TCGA-C8-A132 |
| TCGA-BRCA | Primary Tumor | TCGA-C8-A133-01A-32R-A12C-13 | TCGA-C8-A133 |
| TCGA-BRCA | Primary Tumor | TCGA-C8-A134-01A-11R-A114-13 | TCGA-C8-A134 |
| TCGA-BRCA | Primary Tumor | TCGA-C8-A135-01A-11R-A114-13 | TCGA-C8-A135 |
| TCGA-BRCA | Primary Tumor | TCGA-C8-A137-01A-11R-A114-13 | TCGA-C8-A137 |
| TCGA-BRCA | Primary Tumor | TCGA-C8-A138-01A-11R-A114-13 | TCGA-C8-A138 |
| TCGA-BRCA | Primary Tumor | TCGA-C8-A1HE-01A-11R-A13P-13 | TCGA-C8-A1HE |
| TCGA-BRCA | Primary Tumor | TCGA-C8-A1HF-01A-11R-A136-13 | TCGA-C8-A1HF |
| TCGA-BRCA | Primary Tumor | TCGA-C8-A1HG-01A-11R-A136-13 | TCGA-C8-A1HG |
| TCGA-BRCA | Primary Tumor | TCGA-C8-A1HI-01A-11R-A136-13 | TCGA-C8-A1HI |
| TCGA-BRCA | Primary Tumor | TCGA-C8-A1HJ-01A-11R-A13P-13 | TCGA-C8-A1HJ |
| TCGA-BRCA | Primary Tumor | TCGA-C8-A1HK-01A-21R-A13P-13 | TCGA-C8-A1HK |
| TCGA-BRCA | Primary Tumor | TCGA-C8-A1HL-01A-11R-A136-13 | TCGA-C8-A1HL |
| TCGA-BRCA | Primary Tumor | TCGA-C8-A1HM-01A-12R-A136-13 | TCGA-C8-A1HM |
| TCGA-BRCA | Primary Tumor | TCGA-C8-A1HN-01A-11R-A136-13 | TCGA-C8-A1HN |
| TCGA-BRCA | Primary Tumor | TCGA-C8-A1HO-01A-11R-A13P-13 | TCGA-C8-A1HO |
| TCGA-BRCA | Primary Tumor | TCGA-C8-A26V-01A-11R-A16E-13 | TCGA-C8-A26V |
| TCGA-BRCA | Primary Tumor | TCGA-C8-A26W-01A-11R-A16E-13 | TCGA-C8-A26W |
| TCGA-BRCA | Primary Tumor | TCGA-C8-A26X-01A-31R-A16E-13 | TCGA-C8-A26X |
| TCGA-BRCA | Primary Tumor | TCGA-C8-A26Y-01A-11R-A16E-13 | TCGA-C8-A26Y |
| TCGA-BRCA | Primary Tumor | TCGA-C8-A26Z-01A-11R-A16E-13 | TCGA-C8-A26Z |
| TCGA-BRCA | Primary Tumor | TCGA-C8-A273-01A-11R-A16E-13 | TCGA-C8-A273 |
| TCGA-BRCA | Primary Tumor | TCGA-C8-A274-01A-11R-A16E-13 | TCGA-C8-A274 |
| TCGA-BRCA | Primary Tumor | TCGA-C8-A275-01A-21R-A16E-13 | TCGA-C8-A275 |
| TCGA-BRCA | Primary Tumor | TCGA-C8-A278-01A-11R-A168-13 | TCGA-C8-A278 |
| TCGA-BRCA | Primary Tumor | TCGA-C8-A27A-01A-11R-A168-13 | TCGA-C8-A27A |
| TCGA-BRCA | Primary Tumor | TCGA-C8-A27B-01A-11R-A168-13 | TCGA-C8-A27B |
| TCGA-BRCA | Primary Tumor | TCGA-C8-A3M7-01A-12R-A21U-13 | TCGA-C8-A3M7 |
| TCGA-BRCA | Primary Tumor | TCGA-C8-A3M8-01A-11R-A214-13 | TCGA-C8-A3M8 |
| TCGA-BRCA | Primary Tumor | TCGA-C8-A8HP-01A-11R-A36A-13 | TCGA-C8-A8HP |
| TCGA-BRCA | Primary Tumor | TCGA-C8-A8HQ-01A-11R-A36A-13 | TCGA-C8-A8HQ |
| TCGA-BRCA | Primary Tumor | TCGA-C8-A8HR-01A-11R-A36A-13 | TCGA-C8-A8HR |
| TCGA-BRCA | Primary Tumor | TCGA-C8-A9FZ-01A-11R-A41G-13 | TCGA-C8-A9FZ |
| TCGA-BRCA | Primary Tumor | TCGA-D8-A13Y-01A-11R-A114-13 | TCGA-D8-A13Y |
| TCGA-BRCA | Primary Tumor | TCGA-D8-A13Z-01A-11R-A114-13 | TCGA-D8-A13Z |
| TCGA-BRCA | Primary Tumor | TCGA-D8-A140-01A-11R-A114-13 | TCGA-D8-A140 |
| TCGA-BRCA | Primary Tumor | TCGA-D8-A141-01A-11R-A114-13 | TCGA-D8-A141 |
| TCGA-BRCA | Primary Tumor | TCGA-D8-A142-01A-11R-A114-13 | TCGA-D8-A142 |
| TCGA-BRCA | Primary Tumor | TCGA-D8-A143-01A-11R-A114-13 | TCGA-D8-A143 |
| TCGA-BRCA | Primary Tumor | TCGA-D8-A145-01A-11R-A114-13 | TCGA-D8-A145 |
| TCGA-BRCA | Primary Tumor | TCGA-D8-A146-01A-31R-A114-13 | TCGA-D8-A146 |
| TCGA-BRCA | Primary Tumor | TCGA-D8-A147-01A-11R-A114-13 | TCGA-D8-A147 |
| TCGA-BRCA | Primary Tumor | TCGA-D8-A1J8-01A-11R-A13P-13 | TCGA-D8-A1J8 |
| TCGA-BRCA | Primary Tumor | TCGA-D8-A1J9-01A-11R-A13P-13 | TCGA-D8-A1J9 |
| TCGA-BRCA | Primary Tumor | TCGA-D8-A1JA-01A-11R-A13P-13 | TCGA-D8-A1JA |
| TCGA-BRCA | Primary Tumor | TCGA-D8-A1JB-01A-11R-A13P-13 | TCGA-D8-A1JB |
| TCGA-BRCA | Primary Tumor | TCGA-D8-A1JC-01A-11R-A13P-13 | TCGA-D8-A1JC |
| TCGA-BRCA | Primary Tumor | TCGA-D8-A1JD-01A-11R-A13P-13 | TCGA-D8-A1JD |
| TCGA-BRCA | Primary Tumor | TCGA-D8-A1JE-01A-11R-A13P-13 | TCGA-D8-A1JE |
| TCGA-BRCA | Primary Tumor | TCGA-D8-A1JF-01A-11R-A13P-13 | TCGA-D8-A1JF |
| TCGA-BRCA | Primary Tumor | TCGA-D8-A1JG-01B-11R-A13P-13 | TCGA-D8-A1JG |
| TCGA-BRCA | Primary Tumor | TCGA-D8-A1JH-01A-11R-A13P-13 | TCGA-D8-A1JH |
| TCGA-BRCA | Primary Tumor | TCGA-D8-A1JI-01A-11R-A13P-13 | TCGA-D8-A1JI |
| TCGA-BRCA | Primary Tumor | TCGA-D8-A1JJ-01A-31R-A14L-13 | TCGA-D8-A1JJ |
| TCGA-BRCA | Primary Tumor | TCGA-D8-A1JK-01A-11R-A13P-13 | TCGA-D8-A1JK |
| TCGA-BRCA | Primary Tumor | TCGA-D8-A1JL-01A-11R-A13P-13 | TCGA-D8-A1JL |
| TCGA-BRCA | Primary Tumor | TCGA-D8-A1JN-01A-11R-A13P-13 | TCGA-D8-A1JN |
| TCGA-BRCA | Primary Tumor | TCGA-D8-A1JP-01A-11R-A13P-13 | TCGA-D8-A1JP |

|           |               |                              |              |
|-----------|---------------|------------------------------|--------------|
| TCGA-BRCA | Primary Tumor | TCGA-D8-A1JS-01A-11R-A13P-13 | TCGA-D8-A1JS |
| TCGA-BRCA | Primary Tumor | TCGA-D8-A1JT-01A-31R-A13P-13 | TCGA-D8-A1JT |
| TCGA-BRCA | Primary Tumor | TCGA-D8-A1JU-01A-11R-A13P-13 | TCGA-D8-A1JU |
| TCGA-BRCA | Primary Tumor | TCGA-D8-A1X5-01A-11R-A14C-13 | TCGA-D8-A1X5 |
| TCGA-BRCA | Primary Tumor | TCGA-D8-A1X6-01A-11R-A14L-13 | TCGA-D8-A1X6 |
| TCGA-BRCA | Primary Tumor | TCGA-D8-A1X7-01A-11R-A14L-13 | TCGA-D8-A1X7 |
| TCGA-BRCA | Primary Tumor | TCGA-D8-A1X8-01A-11R-A14L-13 | TCGA-D8-A1X8 |
| TCGA-BRCA | Primary Tumor | TCGA-D8-A1X9-01A-12R-A156-13 | TCGA-D8-A1X9 |
| TCGA-BRCA | Primary Tumor | TCGA-D8-A1XA-01A-11R-A14C-13 | TCGA-D8-A1XA |
| TCGA-BRCA | Primary Tumor | TCGA-D8-A1XB-01A-11R-A14C-13 | TCGA-D8-A1XB |
| TCGA-BRCA | Primary Tumor | TCGA-D8-A1XC-01A-11R-A14C-13 | TCGA-D8-A1XC |
| TCGA-BRCA | Primary Tumor | TCGA-D8-A1XD-01A-11R-A14C-13 | TCGA-D8-A1XD |
| TCGA-BRCA | Primary Tumor | TCGA-D8-A1XF-01A-11R-A14C-13 | TCGA-D8-A1XF |
| TCGA-BRCA | Primary Tumor | TCGA-D8-A1XG-01A-11R-A14C-13 | TCGA-D8-A1XG |
| TCGA-BRCA | Primary Tumor | TCGA-D8-A1XJ-01A-11R-A14L-13 | TCGA-D8-A1XJ |
| TCGA-BRCA | Primary Tumor | TCGA-D8-A1XK-01A-21R-A14L-13 | TCGA-D8-A1XK |
| TCGA-BRCA | Primary Tumor | TCGA-D8-A1XL-01A-11R-A14L-13 | TCGA-D8-A1XL |
| TCGA-BRCA | Primary Tumor | TCGA-D8-A1XM-01A-21R-A14L-13 | TCGA-D8-A1XM |
| TCGA-BRCA | Primary Tumor | TCGA-D8-A1XO-01A-11R-A14L-13 | TCGA-D8-A1XO |
| TCGA-BRCA | Primary Tumor | TCGA-D8-A1XQ-01A-11R-A14L-13 | TCGA-D8-A1XQ |
| TCGA-BRCA | Primary Tumor | TCGA-D8-A1XR-01A-11R-A14L-13 | TCGA-D8-A1XR |
| TCGA-BRCA | Primary Tumor | TCGA-D8-A1XS-01A-11R-A14L-13 | TCGA-D8-A1XS |
| TCGA-BRCA | Primary Tumor | TCGA-D8-A1XT-01A-11R-A14L-13 | TCGA-D8-A1XT |
| TCGA-BRCA | Primary Tumor | TCGA-D8-A1XU-01A-11R-A14L-13 | TCGA-D8-A1XU |
| TCGA-BRCA | Primary Tumor | TCGA-D8-A1XV-01A-11R-A14L-13 | TCGA-D8-A1XV |
| TCGA-BRCA | Primary Tumor | TCGA-D8-A1XW-01A-11R-A14L-13 | TCGA-D8-A1XW |
| TCGA-BRCA | Primary Tumor | TCGA-D8-A1XY-01A-11R-A14L-13 | TCGA-D8-A1XY |
| TCGA-BRCA | Primary Tumor | TCGA-D8-A1XZ-01A-11R-A14L-13 | TCGA-D8-A1XZ |
| TCGA-BRCA | Primary Tumor | TCGA-D8-A1Y0-01A-11R-A14L-13 | TCGA-D8-A1Y0 |
| TCGA-BRCA | Primary Tumor | TCGA-D8-A1Y1-01A-21R-A14L-13 | TCGA-D8-A1Y1 |
| TCGA-BRCA | Primary Tumor | TCGA-D8-A1Y2-01A-11R-A156-13 | TCGA-D8-A1Y2 |
| TCGA-BRCA | Primary Tumor | TCGA-D8-A1Y3-01A-11R-A156-13 | TCGA-D8-A1Y3 |
| TCGA-BRCA | Primary Tumor | TCGA-D8-A27E-01A-11R-A16E-13 | TCGA-D8-A27E |
| TCGA-BRCA | Primary Tumor | TCGA-D8-A27F-01A-11R-A16E-13 | TCGA-D8-A27F |
| TCGA-BRCA | Primary Tumor | TCGA-D8-A27G-01A-11R-A16E-13 | TCGA-D8-A27G |
| TCGA-BRCA | Primary Tumor | TCGA-D8-A27H-01A-11R-A16E-13 | TCGA-D8-A27H |
| TCGA-BRCA | Primary Tumor | TCGA-D8-A27I-01A-11R-A16E-13 | TCGA-D8-A27I |
| TCGA-BRCA | Primary Tumor | TCGA-D8-A27K-01A-11R-A16E-13 | TCGA-D8-A27K |
| TCGA-BRCA | Primary Tumor | TCGA-D8-A27L-01A-11R-A16E-13 | TCGA-D8-A27L |
| TCGA-BRCA | Primary Tumor | TCGA-D8-A27M-01A-11R-A16E-13 | TCGA-D8-A27M |
| TCGA-BRCA | Primary Tumor | TCGA-D8-A27N-01A-11R-A16E-13 | TCGA-D8-A27N |
| TCGA-BRCA | Primary Tumor | TCGA-D8-A27P-01A-11R-A16E-13 | TCGA-D8-A27P |
| TCGA-BRCA | Primary Tumor | TCGA-D8-A27R-01A-11R-A16E-13 | TCGA-D8-A27R |
| TCGA-BRCA | Primary Tumor | TCGA-D8-A27T-01A-11R-A16E-13 | TCGA-D8-A27T |
| TCGA-BRCA | Primary Tumor | TCGA-D8-A27V-01A-12R-A17A-13 | TCGA-D8-A27V |
| TCGA-BRCA | Primary Tumor | TCGA-D8-A27W-01A-11R-A16E-13 | TCGA-D8-A27W |
| TCGA-BRCA | Primary Tumor | TCGA-D8-A3Z5-01A-41R-A24J-13 | TCGA-D8-A3Z5 |
| TCGA-BRCA | Primary Tumor | TCGA-D8-A3Z6-01A-11R-A23A-13 | TCGA-D8-A3Z6 |
| TCGA-BRCA | Primary Tumor | TCGA-D8-A4Z1-01A-21R-A25Z-13 | TCGA-D8-A4Z1 |
| TCGA-BRCA | Primary Tumor | TCGA-D8-A73U-01A-11R-A33A-13 | TCGA-D8-A73U |
| TCGA-BRCA | Primary Tumor | TCGA-D8-A73W-01A-22R-A358-13 | TCGA-D8-A73W |
| TCGA-BRCA | Primary Tumor | TCGA-D8-A73X-01A-11R-A32K-13 | TCGA-D8-A73X |
| TCGA-BRCA | Primary Tumor | TCGA-E2-A105-01A-11R-A10I-13 | TCGA-E2-A105 |
| TCGA-BRCA | Primary Tumor | TCGA-E2-A106-01A-11R-A10I-13 | TCGA-E2-A106 |
| TCGA-BRCA | Primary Tumor | TCGA-E2-A107-01A-11R-A10I-13 | TCGA-E2-A107 |
| TCGA-BRCA | Primary Tumor | TCGA-E2-A108-01A-13R-A10I-13 | TCGA-E2-A108 |
| TCGA-BRCA | Primary Tumor | TCGA-E2-A109-01A-11R-A10I-13 | TCGA-E2-A109 |
| TCGA-BRCA | Primary Tumor | TCGA-E2-A10A-01A-21R-A114-13 | TCGA-E2-A10A |
| TCGA-BRCA | Primary Tumor | TCGA-E2-A10B-01A-11R-A10I-13 | TCGA-E2-A10B |



|           |               |                              |              |
|-----------|---------------|------------------------------|--------------|
| TCGA-BRCA | Primary Tumor | TCGA-E2-A10C-01A-21R-A10I-13 | TCGA-E2-A10C |
| TCGA-BRCA | Primary Tumor | TCGA-E2-A10E-01A-21R-A10I-13 | TCGA-E2-A10E |
| TCGA-BRCA | Primary Tumor | TCGA-E2-A10F-01A-11R-A10I-13 | TCGA-E2-A10F |
| TCGA-BRCA | Primary Tumor | TCGA-E2-A14N-01A-31R-A136-13 | TCGA-E2-A14N |
| TCGA-BRCA | Primary Tumor | TCGA-E2-A14O-01A-31R-A114-13 | TCGA-E2-A14O |
| TCGA-BRCA | Primary Tumor | TCGA-E2-A14P-01A-31R-A12C-13 | TCGA-E2-A14P |
| TCGA-BRCA | Primary Tumor | TCGA-E2-A14Q-01A-11R-A12C-13 | TCGA-E2-A14Q |
| TCGA-BRCA | Primary Tumor | TCGA-E2-A14R-01A-11R-A114-13 | TCGA-E2-A14R |
| TCGA-BRCA | Primary Tumor | TCGA-E2-A14S-01A-11R-A12C-13 | TCGA-E2-A14S |
| TCGA-BRCA | Primary Tumor | TCGA-E2-A14T-01A-11R-A114-13 | TCGA-E2-A14T |
| TCGA-BRCA | Primary Tumor | TCGA-E2-A14U-01A-11R-A22I-13 | TCGA-E2-A14U |
| TCGA-BRCA | Primary Tumor | TCGA-E2-A14V-01A-11R-A12C-13 | TCGA-E2-A14V |
| TCGA-BRCA | Primary Tumor | TCGA-E2-A14W-01A-11R-A12C-13 | TCGA-E2-A14W |
| TCGA-BRCA | Primary Tumor | TCGA-E2-A14X-01A-11R-A114-13 | TCGA-E2-A14X |
| TCGA-BRCA | Primary Tumor | TCGA-E2-A14Y-01A-21R-A12C-13 | TCGA-E2-A14Y |
| TCGA-BRCA | Primary Tumor | TCGA-E2-A14Z-01A-11R-A114-13 | TCGA-E2-A14Z |
| TCGA-BRCA | Primary Tumor | TCGA-E2-A150-01A-11R-A12C-13 | TCGA-E2-A150 |
| TCGA-BRCA | Primary Tumor | TCGA-E2-A152-01A-11R-A12C-13 | TCGA-E2-A152 |
| TCGA-BRCA | Primary Tumor | TCGA-E2-A153-01A-12R-A12C-13 | TCGA-E2-A153 |
| TCGA-BRCA | Primary Tumor | TCGA-E2-A154-01A-11R-A114-13 | TCGA-E2-A154 |
| TCGA-BRCA | Primary Tumor | TCGA-E2-A155-01A-11R-A12C-13 | TCGA-E2-A155 |
| TCGA-BRCA | Primary Tumor | TCGA-E2-A156-01A-11R-A12C-13 | TCGA-E2-A156 |
| TCGA-BRCA | Primary Tumor | TCGA-E2-A158-01A-11R-A12C-13 | TCGA-E2-A158 |
| TCGA-BRCA | Primary Tumor | TCGA-E2-A159-01A-11R-A114-13 | TCGA-E2-A159 |
| TCGA-BRCA | Primary Tumor | TCGA-E2-A15A-01A-11R-A12C-13 | TCGA-E2-A15A |
| TCGA-BRCA | Primary Tumor | TCGA-E2-A15C-01A-31R-A12C-13 | TCGA-E2-A15C |
| TCGA-BRCA | Primary Tumor | TCGA-E2-A15D-01A-11R-A114-13 | TCGA-E2-A15D |
| TCGA-BRCA | Primary Tumor | TCGA-E2-A15E-01A-11R-A12C-13 | TCGA-E2-A15E |
| TCGA-BRCA | Primary Tumor | TCGA-E2-A15F-01A-11R-A114-13 | TCGA-E2-A15F |
| TCGA-BRCA | Primary Tumor | TCGA-E2-A15G-01A-11R-A12C-13 | TCGA-E2-A15G |
| TCGA-BRCA | Primary Tumor | TCGA-E2-A15H-01A-11R-A12C-13 | TCGA-E2-A15H |
| TCGA-BRCA | Primary Tumor | TCGA-E2-A15I-01A-21R-A136-13 | TCGA-E2-A15I |
| TCGA-BRCA | Primary Tumor | TCGA-E2-A15J-01A-11R-A12O-13 | TCGA-E2-A15J |
| TCGA-BRCA | Primary Tumor | TCGA-E2-A15K-01A-11R-A12O-13 | TCGA-E2-A15K |
| TCGA-BRCA | Primary Tumor | TCGA-E2-A15L-01A-11R-A12C-13 | TCGA-E2-A15L |
| TCGA-BRCA | Primary Tumor | TCGA-E2-A15M-01A-11R-A12C-13 | TCGA-E2-A15M |
| TCGA-BRCA | Primary Tumor | TCGA-E2-A15O-01A-11R-A114-13 | TCGA-E2-A15O |
| TCGA-BRCA | Primary Tumor | TCGA-E2-A15P-01A-11R-A114-13 | TCGA-E2-A15P |
| TCGA-BRCA | Primary Tumor | TCGA-E2-A15R-01A-11R-A114-13 | TCGA-E2-A15R |
| TCGA-BRCA | Primary Tumor | TCGA-E2-A15S-01A-11R-A114-13 | TCGA-E2-A15S |
| TCGA-BRCA | Primary Tumor | TCGA-E2-A15T-01A-11R-A114-13 | TCGA-E2-A15T |
| TCGA-BRCA | Primary Tumor | TCGA-E2-A1AZ-01A-11R-A12O-13 | TCGA-E2-A1AZ |
| TCGA-BRCA | Primary Tumor | TCGA-E2-A1B0-01A-11R-A12O-13 | TCGA-E2-A1B0 |
| TCGA-BRCA | Primary Tumor | TCGA-E2-A1B1-01A-21R-A12O-13 | TCGA-E2-A1B1 |
| TCGA-BRCA | Primary Tumor | TCGA-E2-A1B4-01A-11R-A12O-13 | TCGA-E2-A1B4 |
| TCGA-BRCA | Primary Tumor | TCGA-E2-A1B5-01A-21R-A12O-13 | TCGA-E2-A1B5 |
| TCGA-BRCA | Primary Tumor | TCGA-E2-A1B6-01A-31R-A12O-13 | TCGA-E2-A1B6 |
| TCGA-BRCA | Primary Tumor | TCGA-E2-A1BC-01A-11R-A12O-13 | TCGA-E2-A1BC |
| TCGA-BRCA | Primary Tumor | TCGA-E2-A1BD-01A-11R-A12O-13 | TCGA-E2-A1BD |
| TCGA-BRCA | Primary Tumor | TCGA-E2-A1IE-01A-11R-A13P-13 | TCGA-E2-A1IE |
| TCGA-BRCA | Primary Tumor | TCGA-E2-A1IF-01A-11R-A143-13 | TCGA-E2-A1IF |
| TCGA-BRCA | Primary Tumor | TCGA-E2-A1IG-01A-11R-A143-13 | TCGA-E2-A1IG |
| TCGA-BRCA | Primary Tumor | TCGA-E2-A1IH-01A-11R-A13P-13 | TCGA-E2-A1IH |
| TCGA-BRCA | Primary Tumor | TCGA-E2-A1II-01A-11R-A143-13 | TCGA-E2-A1II |
| TCGA-BRCA | Primary Tumor | TCGA-E2-A1IJ-01A-11R-A143-13 | TCGA-E2-A1IJ |
| TCGA-BRCA | Primary Tumor | TCGA-E2-A1IK-01A-11R-A143-13 | TCGA-E2-A1IK |
| TCGA-BRCA | Primary Tumor | TCGA-E2-A1IL-01A-11R-A14C-13 | TCGA-E2-A1IL |
| TCGA-BRCA | Primary Tumor | TCGA-E2-A1IN-01A-11R-A13P-13 | TCGA-E2-A1IN |
| TCGA-BRCA | Primary Tumor | TCGA-E2-A1IO-01A-11R-A143-13 | TCGA-E2-A1IO |

|           |               |                              |              |
|-----------|---------------|------------------------------|--------------|
| TCGA-BRCA | Primary Tumor | TCGA-E2-A1IU-01A-11R-A14C-13 | TCGA-E2-A1IU |
| TCGA-BRCA | Primary Tumor | TCGA-E2-A1L6-01A-11R-A13P-13 | TCGA-E2-A1L6 |
| TCGA-BRCA | Primary Tumor | TCGA-E2-A1L7-01A-11R-A143-13 | TCGA-E2-A1L7 |
| TCGA-BRCA | Primary Tumor | TCGA-E2-A1L8-01A-11R-A13P-13 | TCGA-E2-A1L8 |
| TCGA-BRCA | Primary Tumor | TCGA-E2-A1L9-01A-11R-A13P-13 | TCGA-E2-A1L9 |
| TCGA-BRCA | Primary Tumor | TCGA-E2-A1LA-01A-11R-A143-13 | TCGA-E2-A1LA |
| TCGA-BRCA | Primary Tumor | TCGA-E2-A1LB-01A-11R-A143-13 | TCGA-E2-A1LB |
| TCGA-BRCA | Primary Tumor | TCGA-E2-A1LE-01A-12R-A19V-13 | TCGA-E2-A1LE |
| TCGA-BRCA | Primary Tumor | TCGA-E2-A1LG-01A-21R-A14L-13 | TCGA-E2-A1LG |
| TCGA-BRCA | Primary Tumor | TCGA-E2-A1LH-01A-11R-A14C-13 | TCGA-E2-A1LH |
| TCGA-BRCA | Primary Tumor | TCGA-E2-A1LI-01A-12R-A156-13 | TCGA-E2-A1LI |
| TCGA-BRCA | Primary Tumor | TCGA-E2-A1LK-01A-21R-A14C-13 | TCGA-E2-A1LK |
| TCGA-BRCA | Primary Tumor | TCGA-E2-A1LL-01A-11R-A143-13 | TCGA-E2-A1LL |
| TCGA-BRCA | Primary Tumor | TCGA-E2-A1LS-01A-12R-A156-13 | TCGA-E2-A1LS |
| TCGA-BRCA | Primary Tumor | TCGA-E2-A2P5-01A-11R-A19V-13 | TCGA-E2-A2P5 |
| TCGA-BRCA | Primary Tumor | TCGA-E2-A2P6-01A-11R-A19V-13 | TCGA-E2-A2P6 |
| TCGA-BRCA | Primary Tumor | TCGA-E2-A3DX-01A-21R-A214-13 | TCGA-E2-A3DX |
| TCGA-BRCA | Primary Tumor | TCGA-E2-A56Z-01A-12R-A29V-13 | TCGA-E2-A56Z |
| TCGA-BRCA | Primary Tumor | TCGA-E2-A570-01A-11R-A29V-13 | TCGA-E2-A570 |
| TCGA-BRCA | Primary Tumor | TCGA-E2-A572-01A-13R-A31S-13 | TCGA-E2-A572 |
| TCGA-BRCA | Primary Tumor | TCGA-E2-A573-01A-11R-A29V-13 | TCGA-E2-A573 |
| TCGA-BRCA | Primary Tumor | TCGA-E2-A574-01A-11R-A29V-13 | TCGA-E2-A574 |
| TCGA-BRCA | Primary Tumor | TCGA-E2-A576-01A-11R-A31S-13 | TCGA-E2-A576 |
| TCGA-BRCA | Primary Tumor | TCGA-E2-A9RU-01A-11R-A41G-13 | TCGA-E2-A9RU |
| TCGA-BRCA | Primary Tumor | TCGA-E9-A1N3-01A-12R-A156-13 | TCGA-E9-A1N3 |
| TCGA-BRCA | Primary Tumor | TCGA-E9-A1N4-01A-11R-A14L-13 | TCGA-E9-A1N4 |
| TCGA-BRCA | Primary Tumor | TCGA-E9-A1N5-01A-11R-A14C-13 | TCGA-E9-A1N5 |
| TCGA-BRCA | Primary Tumor | TCGA-E9-A1N6-01A-11R-A143-13 | TCGA-E9-A1N6 |
| TCGA-BRCA | Primary Tumor | TCGA-E9-A1N8-01A-11R-A143-13 | TCGA-E9-A1N8 |
| TCGA-BRCA | Primary Tumor | TCGA-E9-A1N9-01A-11R-A14C-13 | TCGA-E9-A1N9 |
| TCGA-BRCA | Primary Tumor | TCGA-E9-A1NA-01A-11R-A143-13 | TCGA-E9-A1NA |
| TCGA-BRCA | Primary Tumor | TCGA-E9-A1ND-01A-11R-A143-13 | TCGA-E9-A1ND |
| TCGA-BRCA | Primary Tumor | TCGA-E9-A1NE-01A-21R-A14L-13 | TCGA-E9-A1NE |
| TCGA-BRCA | Primary Tumor | TCGA-E9-A1NF-01A-11R-A14C-13 | TCGA-E9-A1NF |
| TCGA-BRCA | Primary Tumor | TCGA-E9-A1NG-01A-21R-A14L-13 | TCGA-E9-A1NG |
| TCGA-BRCA | Primary Tumor | TCGA-E9-A1NH-01A-11R-A14C-13 | TCGA-E9-A1NH |
| TCGA-BRCA | Primary Tumor | TCGA-E9-A1NI-01A-11R-A14C-13 | TCGA-E9-A1NI |
| TCGA-BRCA | Primary Tumor | TCGA-E9-A1QZ-01A-21R-A168-13 | TCGA-E9-A1QZ |
| TCGA-BRCA | Primary Tumor | TCGA-E9-A1R0-01A-22R-A16E-13 | TCGA-E9-A1R0 |
| TCGA-BRCA | Primary Tumor | TCGA-E9-A1R2-01A-11R-A14C-13 | TCGA-E9-A1R2 |
| TCGA-BRCA | Primary Tumor | TCGA-E9-A1R3-01A-31R-A14L-13 | TCGA-E9-A1R3 |
| TCGA-BRCA | Primary Tumor | TCGA-E9-A1R4-01A-21R-A14C-13 | TCGA-E9-A1R4 |
| TCGA-BRCA | Primary Tumor | TCGA-E9-A1R5-01A-11R-A14L-13 | TCGA-E9-A1R5 |
| TCGA-BRCA | Primary Tumor | TCGA-E9-A1R6-01A-11R-A14C-13 | TCGA-E9-A1R6 |
| TCGA-BRCA | Primary Tumor | TCGA-E9-A1R7-01A-11R-A14L-13 | TCGA-E9-A1R7 |
| TCGA-BRCA | Primary Tumor | TCGA-E9-A1RA-01A-11R-A14C-13 | TCGA-E9-A1RA |
| TCGA-BRCA | Primary Tumor | TCGA-E9-A1RB-01A-11R-A156-13 | TCGA-E9-A1RB |
| TCGA-BRCA | Primary Tumor | TCGA-E9-A1RC-01A-11R-A156-13 | TCGA-E9-A1RC |
| TCGA-BRCA | Primary Tumor | TCGA-E9-A1RD-01A-11R-A156-13 | TCGA-E9-A1RD |
| TCGA-BRCA | Primary Tumor | TCGA-E9-A1RE-01A-11R-A156-13 | TCGA-E9-A1RE |
| TCGA-BRCA | Primary Tumor | TCGA-E9-A1RF-01A-11R-A156-13 | TCGA-E9-A1RF |
| TCGA-BRCA | Primary Tumor | TCGA-E9-A1RG-01A-11R-A14C-13 | TCGA-E9-A1RG |
| TCGA-BRCA | Primary Tumor | TCGA-E9-A1RH-01A-21R-A168-13 | TCGA-E9-A1RH |
| TCGA-BRCA | Primary Tumor | TCGA-E9-A1RI-01A-11R-A168-13 | TCGA-E9-A1RI |
| TCGA-BRCA | Primary Tumor | TCGA-E9-A226-01A-21R-A156-13 | TCGA-E9-A226 |
| TCGA-BRCA | Primary Tumor | TCGA-E9-A227-01A-11R-A156-13 | TCGA-E9-A227 |
| TCGA-BRCA | Primary Tumor | TCGA-E9-A228-01A-31R-A156-13 | TCGA-E9-A228 |
| TCGA-BRCA | Primary Tumor | TCGA-E9-A229-01A-31R-A156-13 | TCGA-E9-A229 |
| TCGA-BRCA | Primary Tumor | TCGA-E9-A22A-01A-11R-A156-13 | TCGA-E9-A22A |

|           |               |                              |              |
|-----------|---------------|------------------------------|--------------|
| TCGA-BRCA | Primary Tumor | TCGA-E9-A22B-01A-11R-A156-13 | TCGA-E9-A22B |
| TCGA-BRCA | Primary Tumor | TCGA-E9-A22D-01A-11R-A156-13 | TCGA-E9-A22D |
| TCGA-BRCA | Primary Tumor | TCGA-E9-A22E-01A-11R-A156-13 | TCGA-E9-A22E |
| TCGA-BRCA | Primary Tumor | TCGA-E9-A22G-01A-11R-A156-13 | TCGA-E9-A22G |
| TCGA-BRCA | Primary Tumor | TCGA-E9-A22H-01A-11R-A156-13 | TCGA-E9-A22H |
| TCGA-BRCA | Primary Tumor | TCGA-E9-A243-01A-21R-A168-13 | TCGA-E9-A243 |
| TCGA-BRCA | Primary Tumor | TCGA-E9-A244-01A-11R-A168-13 | TCGA-E9-A244 |
| TCGA-BRCA | Primary Tumor | TCGA-E9-A245-01A-22R-A16E-13 | TCGA-E9-A245 |
| TCGA-BRCA | Primary Tumor | TCGA-E9-A247-01A-11R-A168-13 | TCGA-E9-A247 |
| TCGA-BRCA | Primary Tumor | TCGA-E9-A248-01A-11R-A168-13 | TCGA-E9-A248 |
| TCGA-BRCA | Primary Tumor | TCGA-E9-A249-01A-11R-A168-13 | TCGA-E9-A249 |
| TCGA-BRCA | Primary Tumor | TCGA-E9-A24A-01A-11R-A168-13 | TCGA-E9-A24A |
| TCGA-BRCA | Primary Tumor | TCGA-E9-A295-01A-11R-A16E-13 | TCGA-E9-A295 |
| TCGA-BRCA | Primary Tumor | TCGA-E9-A2JS-01A-11R-A17X-13 | TCGA-E9-A2JS |
| TCGA-BRCA | Primary Tumor | TCGA-E9-A2JT-01A-22R-A18L-13 | TCGA-E9-A2JT |
| TCGA-BRCA | Primary Tumor | TCGA-E9-A3Q9-01A-11R-A21U-13 | TCGA-E9-A3Q9 |
| TCGA-BRCA | Primary Tumor | TCGA-E9-A3QA-01A-61R-A22I-13 | TCGA-E9-A3QA |
| TCGA-BRCA | Primary Tumor | TCGA-E9-A3X8-01A-31R-A22V-13 | TCGA-E9-A3X8 |
| TCGA-BRCA | Primary Tumor | TCGA-E9-A54X-01A-11R-A25Z-13 | TCGA-E9-A54X |
| TCGA-BRCA | Primary Tumor | TCGA-E9-A54Y-01A-11R-A25Z-13 | TCGA-E9-A54Y |
| TCGA-BRCA | Primary Tumor | TCGA-E9-A5FK-01A-11R-A27U-13 | TCGA-E9-A5FK |
| TCGA-BRCA | Primary Tumor | TCGA-E9-A5FL-01A-11R-A27U-13 | TCGA-E9-A5FL |
| TCGA-BRCA | Primary Tumor | TCGA-E9-A5UO-01A-11R-A28I-13 | TCGA-E9-A5UO |
| TCGA-BRCA | Primary Tumor | TCGA-E9-A5UP-01A-11R-A28I-13 | TCGA-E9-A5UP |
| TCGA-BRCA | Primary Tumor | TCGA-E9-A6HE-01A-11R-A31S-13 | TCGA-E9-A6HE |
| TCGA-BRCA | Primary Tumor | TCGA-EW-A1IW-01A-11R-A13P-13 | TCGA-EW-A1IW |
| TCGA-BRCA | Primary Tumor | TCGA-EW-A1IX-01A-12R-A143-13 | TCGA-EW-A1IX |
| TCGA-BRCA | Primary Tumor | TCGA-EW-A1IY-01A-11R-A13P-13 | TCGA-EW-A1IY |
| TCGA-BRCA | Primary Tumor | TCGA-EW-A1IZ-01A-11R-A13P-13 | TCGA-EW-A1IZ |
| TCGA-BRCA | Primary Tumor | TCGA-EW-A1J1-01A-11R-A13P-13 | TCGA-EW-A1J1 |
| TCGA-BRCA | Primary Tumor | TCGA-EW-A1J2-01A-21R-A13P-13 | TCGA-EW-A1J2 |
| TCGA-BRCA | Primary Tumor | TCGA-EW-A1J3-01A-11R-A13P-13 | TCGA-EW-A1J3 |
| TCGA-BRCA | Primary Tumor | TCGA-EW-A1J5-01A-11R-A13P-13 | TCGA-EW-A1J5 |
| TCGA-BRCA | Primary Tumor | TCGA-EW-A1J6-01A-11R-A13P-13 | TCGA-EW-A1J6 |
| TCGA-BRCA | Primary Tumor | TCGA-EW-A1OV-01A-11R-A143-13 | TCGA-EW-A1OV |
| TCGA-BRCA | Primary Tumor | TCGA-EW-A1OW-01A-21R-A143-13 | TCGA-EW-A1OW |
| TCGA-BRCA | Primary Tumor | TCGA-EW-A1OX-01A-11R-A143-13 | TCGA-EW-A1OX |
| TCGA-BRCA | Primary Tumor | TCGA-EW-A1OY-01A-11R-A143-13 | TCGA-EW-A1OY |
| TCGA-BRCA | Primary Tumor | TCGA-EW-A1OZ-01A-11R-A143-13 | TCGA-EW-A1OZ |
| TCGA-BRCA | Primary Tumor | TCGA-EW-A1P0-01A-11R-A143-13 | TCGA-EW-A1P0 |
| TCGA-BRCA | Primary Tumor | TCGA-EW-A1P1-01A-31R-A14C-13 | TCGA-EW-A1P1 |
| TCGA-BRCA | Primary Tumor | TCGA-EW-A1P3-01A-11R-A143-13 | TCGA-EW-A1P3 |
| TCGA-BRCA | Primary Tumor | TCGA-EW-A1P4-01A-21R-A143-13 | TCGA-EW-A1P4 |
| TCGA-BRCA | Primary Tumor | TCGA-EW-A1P5-01A-11R-A143-13 | TCGA-EW-A1P5 |
| TCGA-BRCA | Primary Tumor | TCGA-EW-A1P6-01A-11R-A143-13 | TCGA-EW-A1P6 |
| TCGA-BRCA | Primary Tumor | TCGA-EW-A1P7-01A-21R-A143-13 | TCGA-EW-A1P7 |
| TCGA-BRCA | Primary Tumor | TCGA-EW-A1P8-01A-11R-A143-13 | TCGA-EW-A1P8 |
| TCGA-BRCA | Primary Tumor | TCGA-EW-A1PA-01A-11R-A143-13 | TCGA-EW-A1PA |
| TCGA-BRCA | Primary Tumor | TCGA-EW-A1PB-01A-11R-A143-13 | TCGA-EW-A1PB |
| TCGA-BRCA | Primary Tumor | TCGA-EW-A1PC-01B-11R-A21U-13 | TCGA-EW-A1PC |
| TCGA-BRCA | Primary Tumor | TCGA-EW-A1PD-01A-11R-A143-13 | TCGA-EW-A1PD |
| TCGA-BRCA | Primary Tumor | TCGA-EW-A1PE-01A-11R-A143-13 | TCGA-EW-A1PE |
| TCGA-BRCA | Primary Tumor | TCGA-EW-A1PF-01A-11R-A143-13 | TCGA-EW-A1PF |
| TCGA-BRCA | Primary Tumor | TCGA-EW-A1PG-01A-11R-A143-13 | TCGA-EW-A1PG |
| TCGA-BRCA | Primary Tumor | TCGA-EW-A1PH-01A-11R-A14L-13 | TCGA-EW-A1PH |
| TCGA-BRCA | Primary Tumor | TCGA-EW-A2FR-01A-11R-A21U-13 | TCGA-EW-A2FR |
| TCGA-BRCA | Primary Tumor | TCGA-EW-A2FS-01A-11R-A17A-13 | TCGA-EW-A2FS |
| TCGA-BRCA | Primary Tumor | TCGA-EW-A2FV-01A-11R-A17A-13 | TCGA-EW-A2FV |
| TCGA-BRCA | Primary Tumor | TCGA-EW-A2FW-01A-11R-A17A-13 | TCGA-EW-A2FW |

|           |               |                              |              |
|-----------|---------------|------------------------------|--------------|
| TCGA-BRCA | Primary Tumor | TCGA-EW-A3E8-01B-11R-A24J-13 | TCGA-EW-A3E8 |
| TCGA-BRCA | Primary Tumor | TCGA-EW-A3U0-01A-11R-A22I-13 | TCGA-EW-A3U0 |
| TCGA-BRCA | Primary Tumor | TCGA-EW-A423-01A-11R-A24J-13 | TCGA-EW-A423 |
| TCGA-BRCA | Primary Tumor | TCGA-EW-A424-01A-11R-A24J-13 | TCGA-EW-A424 |
| TCGA-BRCA | Primary Tumor | TCGA-EW-A6S9-01A-22R-A33A-13 | TCGA-EW-A6S9 |
| TCGA-BRCA | Primary Tumor | TCGA-EW-A6SA-01A-21R-A32K-13 | TCGA-EW-A6SA |
| TCGA-BRCA | Primary Tumor | TCGA-EW-A6SB-01A-12R-A32K-13 | TCGA-EW-A6SB |
| TCGA-BRCA | Primary Tumor | TCGA-EW-A6SC-01A-12R-A32K-13 | TCGA-EW-A6SC |
| TCGA-BRCA | Primary Tumor | TCGA-EW-A6SD-01A-12R-A33A-13 | TCGA-EW-A6SD |
| TCGA-BRCA | Primary Tumor | TCGA-GI-A2C8-01A-11R-A16E-13 | TCGA-GI-A2C8 |
| TCGA-BRCA | Primary Tumor | TCGA-GI-A2C9-01A-11R-A21U-13 | TCGA-GI-A2C9 |
| TCGA-BRCA | Primary Tumor | TCGA-GM-A2D9-01A-11R-A18L-13 | TCGA-GM-A2D9 |
| TCGA-BRCA | Primary Tumor | TCGA-GM-A2DA-01A-11R-A18L-13 | TCGA-GM-A2DA |
| TCGA-BRCA | Primary Tumor | TCGA-GM-A2DB-01A-31R-A18L-13 | TCGA-GM-A2DB |
| TCGA-BRCA | Primary Tumor | TCGA-GM-A2DC-01A-11R-A18L-13 | TCGA-GM-A2DC |
| TCGA-BRCA | Primary Tumor | TCGA-GM-A2DD-01A-11R-A17X-13 | TCGA-GM-A2DD |
| TCGA-BRCA | Primary Tumor | TCGA-GM-A2DF-01A-11R-A17X-13 | TCGA-GM-A2DF |
| TCGA-BRCA | Primary Tumor | TCGA-GM-A2DH-01A-11R-A17X-13 | TCGA-GM-A2DH |
| TCGA-BRCA | Primary Tumor | TCGA-GM-A2DI-01A-31R-A18L-13 | TCGA-GM-A2DI |
| TCGA-BRCA | Primary Tumor | TCGA-GM-A2DK-01A-21R-A17X-13 | TCGA-GM-A2DK |
| TCGA-BRCA | Primary Tumor | TCGA-GM-A2DL-01A-11R-A18L-13 | TCGA-GM-A2DL |
| TCGA-BRCA | Primary Tumor | TCGA-GM-A2DM-01A-11R-A17X-13 | TCGA-GM-A2DM |
| TCGA-BRCA | Primary Tumor | TCGA-GM-A2DN-01A-11R-A17X-13 | TCGA-GM-A2DN |
| TCGA-BRCA | Primary Tumor | TCGA-GM-A2DO-01A-11R-A18L-13 | TCGA-GM-A2DO |
| TCGA-BRCA | Primary Tumor | TCGA-GM-A3NW-01A-21R-A22I-13 | TCGA-GM-A3NW |
| TCGA-BRCA | Primary Tumor | TCGA-GM-A3NY-01A-11R-A21U-13 | TCGA-GM-A3NY |
| TCGA-BRCA | Primary Tumor | TCGA-GM-A3XG-01A-31R-A24J-13 | TCGA-GM-A3XG |
| TCGA-BRCA | Primary Tumor | TCGA-GM-A3XL-01A-11R-A22V-13 | TCGA-GM-A3XL |
| TCGA-BRCA | Primary Tumor | TCGA-GM-A3XN-01A-12R-A22V-13 | TCGA-GM-A3XN |
| TCGA-BRCA | Primary Tumor | TCGA-GM-A4E0-01A-12R-A25Z-13 | TCGA-GM-A4E0 |
| TCGA-BRCA | Primary Tumor | TCGA-GM-A5PV-01A-11R-A28I-13 | TCGA-GM-A5PV |
| TCGA-BRCA | Primary Tumor | TCGA-GM-A5PX-01A-12R-A28I-13 | TCGA-GM-A5PX |
| TCGA-BRCA | Primary Tumor | TCGA-HN-A2NL-01A-11R-A18L-13 | TCGA-HN-A2NL |
| TCGA-BRCA | Primary Tumor | TCGA-HN-A2OB-01A-21R-A27U-13 | TCGA-HN-A2OB |
| TCGA-BRCA | Primary Tumor | TCGA-JL-A3YW-01A-12R-A23A-13 | TCGA-JL-A3YW |
| TCGA-BRCA | Primary Tumor | TCGA-JL-A3YX-01A-11R-A22V-13 | TCGA-JL-A3YX |
| TCGA-BRCA | Primary Tumor | TCGA-LD-A66U-01A-11R-A31S-13 | TCGA-LD-A66U |
| TCGA-BRCA | Primary Tumor | TCGA-LD-A74U-01A-13R-A33A-13 | TCGA-LD-A74U |
| TCGA-BRCA | Primary Tumor | TCGA-LD-A7W5-01A-22R-A358-13 | TCGA-LD-A7W5 |
| TCGA-BRCA | Primary Tumor | TCGA-LD-A7W6-01A-81R-A358-13 | TCGA-LD-A7W6 |
| TCGA-BRCA | Primary Tumor | TCGA-LD-A9QF-01A-32R-A41G-13 | TCGA-LD-A9QF |
| TCGA-BRCA | Primary Tumor | TCGA-LL-A440-01A-11R-A24J-13 | TCGA-LL-A440 |
| TCGA-BRCA | Primary Tumor | TCGA-LL-A441-01A-11R-A24J-13 | TCGA-LL-A441 |
| TCGA-BRCA | Primary Tumor | TCGA-LL-A442-01A-11R-A24J-13 | TCGA-LL-A442 |
| TCGA-BRCA | Primary Tumor | TCGA-LL-A50Y-01A-11R-A25Z-13 | TCGA-LL-A50Y |
| TCGA-BRCA | Primary Tumor | TCGA-LL-A5YL-01A-12R-A29V-13 | TCGA-LL-A5YL |
| TCGA-BRCA | Primary Tumor | TCGA-LL-A5YM-01A-11R-A28I-13 | TCGA-LL-A5YM |
| TCGA-BRCA | Primary Tumor | TCGA-LL-A5YN-01A-11R-A28I-13 | TCGA-LL-A5YN |
| TCGA-BRCA | Primary Tumor | TCGA-LL-A5YO-01A-21R-A28I-13 | TCGA-LL-A5YO |
| TCGA-BRCA | Primary Tumor | TCGA-LL-A5YP-01A-21R-A28I-13 | TCGA-LL-A5YP |
| TCGA-BRCA | Primary Tumor | TCGA-LL-A6FP-01A-11R-A31S-13 | TCGA-LL-A6FP |
| TCGA-BRCA | Primary Tumor | TCGA-LL-A6FQ-01A-11R-A31S-13 | TCGA-LL-A6FQ |
| TCGA-BRCA | Primary Tumor | TCGA-LL-A6FR-01A-12R-A31S-13 | TCGA-LL-A6FR |
| TCGA-BRCA | Primary Tumor | TCGA-LL-A73Y-01A-11R-A33A-13 | TCGA-LL-A73Y |
| TCGA-BRCA | Primary Tumor | TCGA-LL-A73Z-01A-11R-A32K-13 | TCGA-LL-A73Z |
| TCGA-BRCA | Primary Tumor | TCGA-LL-A740-01A-21R-A32K-13 | TCGA-LL-A740 |
| TCGA-BRCA | Primary Tumor | TCGA-LL-A7SZ-01A-32R-A358-13 | TCGA-LL-A7SZ |
| TCGA-BRCA | Primary Tumor | TCGA-LL-A7T0-01A-31R-A358-13 | TCGA-LL-A7T0 |
| TCGA-BRCA | Primary Tumor | TCGA-LL-A8F5-01A-11R-A36A-13 | TCGA-LL-A8F5 |

|           |               |                              |              |
|-----------|---------------|------------------------------|--------------|
| TCGA-BRCA | Primary Tumor | TCGA-LL-A9Q3-01A-11R-A41G-13 | TCGA-LL-A9Q3 |
| TCGA-BRCA | Primary Tumor | TCGA-LQ-A4E4-01A-11R-A25Z-13 | TCGA-LQ-A4E4 |
| TCGA-BRCA | Primary Tumor | TCGA-MS-A51U-01A-31R-A25Z-13 | TCGA-MS-A51U |
| TCGA-BRCA | Primary Tumor | TCGA-OK-A5Q2-01A-11R-A27U-13 | TCGA-OK-A5Q2 |
| TCGA-BRCA | Primary Tumor | TCGA-OL-A5D6-01A-21R-A27U-13 | TCGA-OL-A5D6 |
| TCGA-BRCA | Primary Tumor | TCGA-OL-A5D7-01A-11R-A27U-13 | TCGA-OL-A5D7 |
| TCGA-BRCA | Primary Tumor | TCGA-OL-A5D8-01A-11R-A27U-13 | TCGA-OL-A5D8 |
| TCGA-BRCA | Primary Tumor | TCGA-OL-A5DA-01A-11R-A27U-13 | TCGA-OL-A5DA |
| TCGA-BRCA | Primary Tumor | TCGA-OL-A5RU-01A-11R-A28I-13 | TCGA-OL-A5RU |
| TCGA-BRCA | Primary Tumor | TCGA-OL-A5RV-01A-12R-A28I-13 | TCGA-OL-A5RV |
| TCGA-BRCA | Primary Tumor | TCGA-OL-A5RW-01A-11R-A28I-13 | TCGA-OL-A5RW |
| TCGA-BRCA | Primary Tumor | TCGA-OL-A5RX-01A-11R-A28I-13 | TCGA-OL-A5RX |
| TCGA-BRCA | Primary Tumor | TCGA-OL-A5RY-01A-21R-A28I-13 | TCGA-OL-A5RY |
| TCGA-BRCA | Primary Tumor | TCGA-OL-A5RZ-01A-11R-A28I-13 | TCGA-OL-A5RZ |
| TCGA-BRCA | Primary Tumor | TCGA-OL-A5S0-01A-11R-A28I-13 | TCGA-OL-A5S0 |
| TCGA-BRCA | Primary Tumor | TCGA-OL-A66H-01A-11R-A29V-13 | TCGA-OL-A66H |
| TCGA-BRCA | Primary Tumor | TCGA-OL-A66I-01A-21R-A29V-13 | TCGA-OL-A66I |
| TCGA-BRCA | Primary Tumor | TCGA-OL-A66J-01A-11R-A29V-13 | TCGA-OL-A66J |
| TCGA-BRCA | Primary Tumor | TCGA-OL-A66K-01A-11R-A29V-13 | TCGA-OL-A66K |
| TCGA-BRCA | Primary Tumor | TCGA-OL-A66L-01A-12R-A31S-13 | TCGA-OL-A66L |
| TCGA-BRCA | Primary Tumor | TCGA-OL-A66N-01A-12R-A31S-13 | TCGA-OL-A66N |
| TCGA-BRCA | Primary Tumor | TCGA-OL-A66O-01A-11R-A31S-13 | TCGA-OL-A66O |
| TCGA-BRCA | Primary Tumor | TCGA-OL-A66P-01A-11R-A31S-13 | TCGA-OL-A66P |
| TCGA-BRCA | Primary Tumor | TCGA-OL-A6VO-01A-12R-A33A-13 | TCGA-OL-A6VO |
| TCGA-BRCA | Primary Tumor | TCGA-OL-A6VQ-01A-12R-A41G-13 | TCGA-OL-A6VQ |
| TCGA-BRCA | Primary Tumor | TCGA-OL-A6VR-01A-32R-A33A-13 | TCGA-OL-A6VR |
| TCGA-BRCA | Primary Tumor | TCGA-OL-A97C-01A-32R-A41G-13 | TCGA-OL-A97C |
| TCGA-BRCA | Primary Tumor | TCGA-PE-A5DC-01A-12R-A27U-13 | TCGA-PE-A5DC |
| TCGA-BRCA | Primary Tumor | TCGA-PE-A5DD-01A-12R-A27U-13 | TCGA-PE-A5DD |
| TCGA-BRCA | Primary Tumor | TCGA-PE-A5DE-01A-11R-A27U-13 | TCGA-PE-A5DE |
| TCGA-BRCA | Primary Tumor | TCGA-PL-A8LV-01A-21R-A41G-13 | TCGA-PL-A8LV |
| TCGA-BRCA | Primary Tumor | TCGA-PL-A8LX-01A-11R-A41G-13 | TCGA-PL-A8LX |
| TCGA-BRCA | Primary Tumor | TCGA-PL-A8LY-01A-11R-A41G-13 | TCGA-PL-A8LY |
| TCGA-BRCA | Primary Tumor | TCGA-PL-A8LZ-01A-31R-A36A-13 | TCGA-PL-A8LZ |
| TCGA-BRCA | Primary Tumor | TCGA-S3-A6ZF-01A-32R-A32K-13 | TCGA-S3-A6ZF |
| TCGA-BRCA | Primary Tumor | TCGA-S3-A6ZG-01A-22R-A32K-13 | TCGA-S3-A6ZG |
| TCGA-BRCA | Primary Tumor | TCGA-S3-A6ZH-01A-22R-A32K-13 | TCGA-S3-A6ZH |
| TCGA-BRCA | Primary Tumor | TCGA-S3-AA0Z-01A-11R-A41G-13 | TCGA-S3-AA0Z |
| TCGA-BRCA | Primary Tumor | TCGA-S3-AA10-01A-21R-A41G-13 | TCGA-S3-AA10 |
| TCGA-BRCA | Primary Tumor | TCGA-S3-AA11-01A-31R-A41G-13 | TCGA-S3-AA11 |
| TCGA-BRCA | Primary Tumor | TCGA-S3-AA12-01A-11R-A41G-13 | TCGA-S3-AA12 |
| TCGA-BRCA | Primary Tumor | TCGA-S3-AA14-01A-11R-A41G-13 | TCGA-S3-AA14 |
| TCGA-BRCA | Primary Tumor | TCGA-S3-AA15-01A-11R-A41G-13 | TCGA-S3-AA15 |
| TCGA-BRCA | Primary Tumor | TCGA-S3-AA17-01A-11R-A41G-13 | TCGA-S3-AA17 |
| TCGA-BRCA | Primary Tumor | TCGA-UL-AAZ6-01A-11R-A41G-13 | TCGA-UL-AAZ6 |
| TCGA-BRCA | Primary Tumor | TCGA-UU-A93S-01A-21R-A41G-13 | TCGA-UU-A93S |
| TCGA-BRCA | Primary Tumor | TCGA-V7-A7HQ-01A-11R-A33A-13 | TCGA-V7-A7HQ |
| TCGA-BRCA | Primary Tumor | TCGA-W8-A86G-01A-21R-A36A-13 | TCGA-W8-A86G |
| TCGA-BRCA | Primary Tumor | TCGA-WT-AB41-01A-11R-A41G-13 | TCGA-WT-AB41 |
| TCGA-BRCA | Primary Tumor | TCGA-WT-AB44-01A-11R-A41G-13 | TCGA-WT-AB44 |
| TCGA-BRCA | Primary Tumor | TCGA-XX-A899-01A-11R-A36A-13 | TCGA-XX-A899 |
| TCGA-BRCA | Primary Tumor | TCGA-XX-A89A-01A-11R-A36A-13 | TCGA-XX-A89A |
| TCGA-BRCA | Primary Tumor | TCGA-Z7-A8R5-01A-42R-A41G-13 | TCGA-Z7-A8R5 |
| TCGA-BRCA | Primary Tumor | TCGA-Z7-A8R6-01A-11R-A41G-13 | TCGA-Z7-A8R6 |
| TCGA-UCEC | Primary Tumor | TCGA-2E-A9G8-01A-11R-A404-13 | TCGA-2E-A9G8 |
| TCGA-UCEC | Primary Tumor | TCGA-4E-A92E-01A-11R-A37P-13 | TCGA-4E-A92E |
| TCGA-UCEC | Primary Tumor | TCGA-5B-A90C-01A-11R-A37P-13 | TCGA-5B-A90C |
| TCGA-UCEC | Primary Tumor | TCGA-5S-A9Q8-01A-11R-A404-13 | TCGA-5S-A9Q8 |
| TCGA-UCEC | Primary Tumor | TCGA-A5-A0G1-01A-11R-A119-13 | TCGA-A5-A0G1 |

|           |               |                              |              |
|-----------|---------------|------------------------------|--------------|
| TCGA-UCEC | Primary Tumor | TCGA-A5-A0G2-01A-11R-A041-13 | TCGA-A5-A0G2 |
| TCGA-UCEC | Primary Tumor | TCGA-A5-A0G3-01A-11R-A041-13 | TCGA-A5-A0G3 |
| TCGA-UCEC | Primary Tumor | TCGA-A5-A0G5-01A-11R-A041-13 | TCGA-A5-A0G5 |
| TCGA-UCEC | Primary Tumor | TCGA-A5-A0G9-01A-11R-A041-13 | TCGA-A5-A0G9 |
| TCGA-UCEC | Primary Tumor | TCGA-A5-A0GA-01A-11R-A041-13 | TCGA-A5-A0GA |
| TCGA-UCEC | Primary Tumor | TCGA-A5-A0GB-01A-11R-A041-13 | TCGA-A5-A0GB |
| TCGA-UCEC | Primary Tumor | TCGA-A5-A0GD-01A-11R-A041-13 | TCGA-A5-A0GD |
| TCGA-UCEC | Primary Tumor | TCGA-A5-A0GE-01A-11R-A041-13 | TCGA-A5-A0GE |
| TCGA-UCEC | Primary Tumor | TCGA-A5-A0GG-01A-11R-A119-13 | TCGA-A5-A0GG |
| TCGA-UCEC | Primary Tumor | TCGA-A5-A0GH-01A-21R-A041-13 | TCGA-A5-A0GH |
| TCGA-UCEC | Primary Tumor | TCGA-A5-A0GI-01A-11R-A041-13 | TCGA-A5-A0GI |
| TCGA-UCEC | Primary Tumor | TCGA-A5-A0GJ-01A-11R-A041-13 | TCGA-A5-A0GJ |
| TCGA-UCEC | Primary Tumor | TCGA-A5-A0GM-01A-11R-A041-13 | TCGA-A5-A0GM |
| TCGA-UCEC | Primary Tumor | TCGA-A5-A0GN-01A-11R-A041-13 | TCGA-A5-A0GN |
| TCGA-UCEC | Primary Tumor | TCGA-A5-A0GP-01A-11R-A041-13 | TCGA-A5-A0GP |
| TCGA-UCEC | Primary Tumor | TCGA-A5-A0GQ-01A-11R-A119-13 | TCGA-A5-A0GQ |
| TCGA-UCEC | Primary Tumor | TCGA-A5-A0GR-01A-11R-A119-13 | TCGA-A5-A0GR |
| TCGA-UCEC | Primary Tumor | TCGA-A5-A0GU-01A-11R-A041-13 | TCGA-A5-A0GU |
| TCGA-UCEC | Primary Tumor | TCGA-A5-A0GV-01A-31R-A041-13 | TCGA-A5-A0GV |
| TCGA-UCEC | Primary Tumor | TCGA-A5-A0GW-01A-11R-A041-13 | TCGA-A5-A0GW |
| TCGA-UCEC | Primary Tumor | TCGA-A5-A0GX-01A-11R-A041-13 | TCGA-A5-A0GX |
| TCGA-UCEC | Primary Tumor | TCGA-A5-A0R6-01A-11R-A103-13 | TCGA-A5-A0R6 |
| TCGA-UCEC | Primary Tumor | TCGA-A5-A0R7-01A-31R-A103-13 | TCGA-A5-A0R7 |
| TCGA-UCEC | Primary Tumor | TCGA-A5-A0R8-01A-11R-A103-13 | TCGA-A5-A0R8 |
| TCGA-UCEC | Primary Tumor | TCGA-A5-A0R9-01A-11R-A103-13 | TCGA-A5-A0R9 |
| TCGA-UCEC | Primary Tumor | TCGA-A5-A0RA-01A-21R-A103-13 | TCGA-A5-A0RA |
| TCGA-UCEC | Primary Tumor | TCGA-A5-A0VO-01A-21R-A108-13 | TCGA-A5-A0VO |
| TCGA-UCEC | Primary Tumor | TCGA-A5-A0VP-01A-21R-A103-13 | TCGA-A5-A0VP |
| TCGA-UCEC | Primary Tumor | TCGA-A5-A0VQ-01A-11R-A103-13 | TCGA-A5-A0VQ |
| TCGA-UCEC | Primary Tumor | TCGA-A5-A1OF-01A-11R-A14C-13 | TCGA-A5-A1OF |
| TCGA-UCEC | Primary Tumor | TCGA-A5-A1OG-01A-11R-A14C-13 | TCGA-A5-A1OG |
| TCGA-UCEC | Primary Tumor | TCGA-A5-A1OH-01A-21R-A22I-13 | TCGA-A5-A1OH |
| TCGA-UCEC | Primary Tumor | TCGA-A5-A1OJ-01A-11R-A14C-13 | TCGA-A5-A1OJ |
| TCGA-UCEC | Primary Tumor | TCGA-A5-A1OK-01A-11R-A14L-13 | TCGA-A5-A1OK |
| TCGA-UCEC | Primary Tumor | TCGA-A5-A2K2-01A-11R-A18L-13 | TCGA-A5-A2K2 |
| TCGA-UCEC | Primary Tumor | TCGA-A5-A2K3-01A-11R-A17X-13 | TCGA-A5-A2K3 |
| TCGA-UCEC | Primary Tumor | TCGA-A5-A2K4-01A-11R-A18L-13 | TCGA-A5-A2K4 |
| TCGA-UCEC | Primary Tumor | TCGA-A5-A2K5-01A-11R-A17X-13 | TCGA-A5-A2K5 |
| TCGA-UCEC | Primary Tumor | TCGA-A5-A2K7-01A-11R-A17X-13 | TCGA-A5-A2K7 |
| TCGA-UCEC | Primary Tumor | TCGA-A5-A3LO-01A-11R-A22I-13 | TCGA-A5-A3LO |
| TCGA-UCEC | Primary Tumor | TCGA-A5-A3LP-01A-11R-A22I-13 | TCGA-A5-A3LP |
| TCGA-UCEC | Primary Tumor | TCGA-A5-A7WJ-01A-12R-A34O-13 | TCGA-A5-A7WJ |
| TCGA-UCEC | Primary Tumor | TCGA-A5-A7WK-01A-11R-A34O-13 | TCGA-A5-A7WK |
| TCGA-UCEC | Primary Tumor | TCGA-A5-AB3J-01A-11R-A404-13 | TCGA-A5-AB3J |
| TCGA-UCEC | Primary Tumor | TCGA-AJ-A23M-01A-11R-A156-13 | TCGA-AJ-A23M |
| TCGA-UCEC | Primary Tumor | TCGA-AJ-A23N-01A-11R-A22I-13 | TCGA-AJ-A23N |
| TCGA-UCEC | Primary Tumor | TCGA-AJ-A23O-01A-11R-A156-13 | TCGA-AJ-A23O |
| TCGA-UCEC | Primary Tumor | TCGA-AJ-A2QK-01A-11R-A18L-13 | TCGA-AJ-A2QK |
| TCGA-UCEC | Primary Tumor | TCGA-AJ-A2QL-01A-11R-A18L-13 | TCGA-AJ-A2QL |
| TCGA-UCEC | Primary Tumor | TCGA-AJ-A2QM-01A-11R-A18L-13 | TCGA-AJ-A2QM |
| TCGA-UCEC | Primary Tumor | TCGA-AJ-A2QN-01A-11R-A18L-13 | TCGA-AJ-A2QN |
| TCGA-UCEC | Primary Tumor | TCGA-AJ-A2QO-01A-11R-A18L-13 | TCGA-AJ-A2QO |
| TCGA-UCEC | Primary Tumor | TCGA-AJ-A3BD-01A-11R-A19V-13 | TCGA-AJ-A3BD |
| TCGA-UCEC | Primary Tumor | TCGA-AJ-A3BF-01A-11R-A214-13 | TCGA-AJ-A3BF |
| TCGA-UCEC | Primary Tumor | TCGA-AJ-A3BG-01A-11R-A19V-13 | TCGA-AJ-A3BG |
| TCGA-UCEC | Primary Tumor | TCGA-AJ-A3BH-01A-11R-A19V-13 | TCGA-AJ-A3BH |
| TCGA-UCEC | Primary Tumor | TCGA-AJ-A3BI-01A-11R-A214-13 | TCGA-AJ-A3BI |
| TCGA-UCEC | Primary Tumor | TCGA-AJ-A3BK-01A-11R-A19V-13 | TCGA-AJ-A3BK |
| TCGA-UCEC | Primary Tumor | TCGA-AJ-A3EJ-01A-11R-A19V-13 | TCGA-AJ-A3EJ |

|           |               |                              |              |
|-----------|---------------|------------------------------|--------------|
| TCGA-UCEC | Primary Tumor | TCGA-AJ-A3EK-01A-11R-A19V-13 | TCGA-AJ-A3EK |
| TCGA-UCEC | Primary Tumor | TCGA-AJ-A3EL-01A-11R-A214-13 | TCGA-AJ-A3EL |
| TCGA-UCEC | Primary Tumor | TCGA-AJ-A3EM-01A-11R-A214-13 | TCGA-AJ-A3EM |
| TCGA-UCEC | Primary Tumor | TCGA-AJ-A3I9-01A-11R-A22I-13 | TCGA-AJ-A3I9 |
| TCGA-UCEC | Primary Tumor | TCGA-AJ-A3IA-01A-11R-A214-13 | TCGA-AJ-A3IA |
| TCGA-UCEC | Primary Tumor | TCGA-AJ-A3NC-01A-11R-A22I-13 | TCGA-AJ-A3NC |
| TCGA-UCEC | Primary Tumor | TCGA-AJ-A3NE-01A-11R-A22I-13 | TCGA-AJ-A3NE |
| TCGA-UCEC | Primary Tumor | TCGA-AJ-A3NF-01A-11R-A22I-13 | TCGA-AJ-A3NF |
| TCGA-UCEC | Primary Tumor | TCGA-AJ-A3NG-01A-11R-A22I-13 | TCGA-AJ-A3NG |
| TCGA-UCEC | Primary Tumor | TCGA-AJ-A3NH-01A-11R-A22I-13 | TCGA-AJ-A3NH |
| TCGA-UCEC | Primary Tumor | TCGA-AJ-A3OJ-01A-11R-A22I-13 | TCGA-AJ-A3OJ |
| TCGA-UCEC | Primary Tumor | TCGA-AJ-A3OK-01A-12R-A22I-13 | TCGA-AJ-A3OK |
| TCGA-UCEC | Primary Tumor | TCGA-AJ-A3OL-01A-11R-A22I-13 | TCGA-AJ-A3OL |
| TCGA-UCEC | Primary Tumor | TCGA-AJ-A3QS-01A-11R-A22I-13 | TCGA-AJ-A3QS |
| TCGA-UCEC | Primary Tumor | TCGA-AJ-A3TW-01A-11R-A22I-13 | TCGA-AJ-A3TW |
| TCGA-UCEC | Primary Tumor | TCGA-AJ-A5DV-01A-11R-A27R-13 | TCGA-AJ-A5DV |
| TCGA-UCEC | Primary Tumor | TCGA-AJ-A5DW-01A-11R-A27R-13 | TCGA-AJ-A5DW |
| TCGA-UCEC | Primary Tumor | TCGA-AJ-A6NU-01A-11R-A34O-13 | TCGA-AJ-A6NU |
| TCGA-UCEC | Primary Tumor | TCGA-AJ-A8CT-01A-11R-A37P-13 | TCGA-AJ-A8CT |
| TCGA-UCEC | Primary Tumor | TCGA-AJ-A8CV-01A-11R-A37P-13 | TCGA-AJ-A8CV |
| TCGA-UCEC | Primary Tumor | TCGA-AJ-A8CW-01A-11R-A37P-13 | TCGA-AJ-A8CW |
| TCGA-UCEC | Primary Tumor | TCGA-AP-A051-01A-21R-A00W-13 | TCGA-AP-A051 |
| TCGA-UCEC | Primary Tumor | TCGA-AP-A053-01A-21R-A00W-13 | TCGA-AP-A053 |
| TCGA-UCEC | Primary Tumor | TCGA-AP-A054-01A-11R-A041-13 | TCGA-AP-A054 |
| TCGA-UCEC | Primary Tumor | TCGA-AP-A059-01A-21R-A119-13 | TCGA-AP-A059 |
| TCGA-UCEC | Primary Tumor | TCGA-AP-A05O-01A-12R-A119-13 | TCGA-AP-A05O |
| TCGA-UCEC | Primary Tumor | TCGA-AP-A05P-01A-11R-A041-13 | TCGA-AP-A05P |
| TCGA-UCEC | Primary Tumor | TCGA-AP-A0L8-01A-11R-A041-13 | TCGA-AP-A0L8 |
| TCGA-UCEC | Primary Tumor | TCGA-AP-A0L9-01A-11R-A041-13 | TCGA-AP-A0L9 |
| TCGA-UCEC | Primary Tumor | TCGA-AP-A0LD-01A-11R-A041-13 | TCGA-AP-A0LD |
| TCGA-UCEC | Primary Tumor | TCGA-AP-A0LE-01A-11R-A103-13 | TCGA-AP-A0LE |
| TCGA-UCEC | Primary Tumor | TCGA-AP-A0LF-01A-11R-A119-13 | TCGA-AP-A0LF |
| TCGA-UCEC | Primary Tumor | TCGA-AP-A0LG-01A-11R-A041-13 | TCGA-AP-A0LG |
| TCGA-UCEC | Primary Tumor | TCGA-AP-A0LH-01A-11R-A041-13 | TCGA-AP-A0LH |
| TCGA-UCEC | Primary Tumor | TCGA-AP-A0LI-01A-11R-A041-13 | TCGA-AP-A0LI |
| TCGA-UCEC | Primary Tumor | TCGA-AP-A0LJ-01A-11R-A041-13 | TCGA-AP-A0LJ |
| TCGA-UCEC | Primary Tumor | TCGA-AP-A0LL-01A-12R-A103-13 | TCGA-AP-A0LL |
| TCGA-UCEC | Primary Tumor | TCGA-AP-A0LM-01A-11R-A119-13 | TCGA-AP-A0LM |
| TCGA-UCEC | Primary Tumor | TCGA-AP-A0LN-01A-11R-A041-13 | TCGA-AP-A0LN |
| TCGA-UCEC | Primary Tumor | TCGA-AP-A0LO-01A-11R-A041-13 | TCGA-AP-A0LO |
| TCGA-UCEC | Primary Tumor | TCGA-AP-A0LP-01A-12R-A103-13 | TCGA-AP-A0LP |
| TCGA-UCEC | Primary Tumor | TCGA-AP-A0LQ-01A-12R-A103-13 | TCGA-AP-A0LQ |
| TCGA-UCEC | Primary Tumor | TCGA-AP-A0LS-01A-11R-A14C-13 | TCGA-AP-A0LS |
| TCGA-UCEC | Primary Tumor | TCGA-AP-A0LT-01A-11R-A041-13 | TCGA-AP-A0LT |
| TCGA-UCEC | Primary Tumor | TCGA-AP-A0LV-01A-11R-A041-13 | TCGA-AP-A0LV |
| TCGA-UCEC | Primary Tumor | TCGA-AP-A1DH-01A-31R-A136-13 | TCGA-AP-A1DH |
| TCGA-UCEC | Primary Tumor | TCGA-AP-A1DK-01A-11R-A136-13 | TCGA-AP-A1DK |
| TCGA-UCEC | Primary Tumor | TCGA-AP-A1DM-01A-21R-A136-13 | TCGA-AP-A1DM |
| TCGA-UCEC | Primary Tumor | TCGA-AP-A1DO-01A-11R-A136-13 | TCGA-AP-A1DO |
| TCGA-UCEC | Primary Tumor | TCGA-AP-A1DP-01A-11R-A136-13 | TCGA-AP-A1DP |
| TCGA-UCEC | Primary Tumor | TCGA-AP-A1DQ-01A-11R-A136-13 | TCGA-AP-A1DQ |
| TCGA-UCEC | Primary Tumor | TCGA-AP-A1DR-01A-11R-A136-13 | TCGA-AP-A1DR |
| TCGA-UCEC | Primary Tumor | TCGA-AP-A1DV-01A-21R-A136-13 | TCGA-AP-A1DV |
| TCGA-UCEC | Primary Tumor | TCGA-AP-A1E0-01A-11R-A136-13 | TCGA-AP-A1E0 |
| TCGA-UCEC | Primary Tumor | TCGA-AP-A1E1-01A-11R-A136-13 | TCGA-AP-A1E1 |
| TCGA-UCEC | Primary Tumor | TCGA-AP-A1E3-01A-11R-A136-13 | TCGA-AP-A1E3 |
| TCGA-UCEC | Primary Tumor | TCGA-AP-A1E4-01A-12R-A136-13 | TCGA-AP-A1E4 |
| TCGA-UCEC | Primary Tumor | TCGA-AP-A3K1-01A-11R-A214-13 | TCGA-AP-A3K1 |
| TCGA-UCEC | Primary Tumor | TCGA-AP-A5FX-01A-11R-A27R-13 | TCGA-AP-A5FX |

|           |               |                              |              |
|-----------|---------------|------------------------------|--------------|
| TCGA-UCEC | Primary Tumor | TCGA-AW-A1PO-01A-12R-A156-13 | TCGA-AW-A1PO |
| TCGA-UCEC | Primary Tumor | TCGA-AX-A05S-01A-11R-A00W-13 | TCGA-AX-A05S |
| TCGA-UCEC | Primary Tumor | TCGA-AX-A05T-01A-11R-A00W-13 | TCGA-AX-A05T |
| TCGA-UCEC | Primary Tumor | TCGA-AX-A05U-01A-11R-A00W-13 | TCGA-AX-A05U |
| TCGA-UCEC | Primary Tumor | TCGA-AX-A05W-01A-21R-A00W-13 | TCGA-AX-A05W |
| TCGA-UCEC | Primary Tumor | TCGA-AX-A05Y-01A-11R-A00W-13 | TCGA-AX-A05Y |
| TCGA-UCEC | Primary Tumor | TCGA-AX-A05Z-01A-11R-A00W-13 | TCGA-AX-A05Z |
| TCGA-UCEC | Primary Tumor | TCGA-AX-A060-01A-11R-A00W-13 | TCGA-AX-A060 |
| TCGA-UCEC | Primary Tumor | TCGA-AX-A062-01A-11R-A00W-13 | TCGA-AX-A062 |
| TCGA-UCEC | Primary Tumor | TCGA-AX-A063-01A-11R-A00W-13 | TCGA-AX-A063 |
| TCGA-UCEC | Primary Tumor | TCGA-AX-A064-01A-11R-A00W-13 | TCGA-AX-A064 |
| TCGA-UCEC | Primary Tumor | TCGA-AX-A06B-01A-11R-A00W-13 | TCGA-AX-A06B |
| TCGA-UCEC | Primary Tumor | TCGA-AX-A06D-01A-11R-A119-13 | TCGA-AX-A06D |
| TCGA-UCEC | Primary Tumor | TCGA-AX-A06F-01A-11R-A00W-13 | TCGA-AX-A06F |
| TCGA-UCEC | Primary Tumor | TCGA-AX-A06H-01A-11R-A119-13 | TCGA-AX-A06H |
| TCGA-UCEC | Primary Tumor | TCGA-AX-A06J-01A-11R-A00W-13 | TCGA-AX-A06J |
| TCGA-UCEC | Primary Tumor | TCGA-AX-A06L-01A-11R-A119-13 | TCGA-AX-A06L |
| TCGA-UCEC | Primary Tumor | TCGA-AX-A0IS-01A-12R-A10I-13 | TCGA-AX-A0IS |
| TCGA-UCEC | Primary Tumor | TCGA-AX-A0IU-01A-11R-A103-13 | TCGA-AX-A0IU |
| TCGA-UCEC | Primary Tumor | TCGA-AX-A0IW-01A-11R-A041-13 | TCGA-AX-A0IW |
| TCGA-UCEC | Primary Tumor | TCGA-AX-A0IZ-01A-11R-A119-13 | TCGA-AX-A0IZ |
| TCGA-UCEC | Primary Tumor | TCGA-AX-A0J0-01A-11R-A108-13 | TCGA-AX-A0J0 |
| TCGA-UCEC | Primary Tumor | TCGA-AX-A0J1-01A-11R-A041-13 | TCGA-AX-A0J1 |
| TCGA-UCEC | Primary Tumor | TCGA-AX-A1C4-01A-11R-A136-13 | TCGA-AX-A1C4 |
| TCGA-UCEC | Primary Tumor | TCGA-AX-A1C5-01A-11R-A136-13 | TCGA-AX-A1C5 |
| TCGA-UCEC | Primary Tumor | TCGA-AX-A1C7-01A-11R-A136-13 | TCGA-AX-A1C7 |
| TCGA-UCEC | Primary Tumor | TCGA-AX-A1C8-01A-11R-A136-13 | TCGA-AX-A1C8 |
| TCGA-UCEC | Primary Tumor | TCGA-AX-A1C9-01A-11R-A136-13 | TCGA-AX-A1C9 |
| TCGA-UCEC | Primary Tumor | TCGA-AX-A1CA-01A-12R-A136-13 | TCGA-AX-A1CA |
| TCGA-UCEC | Primary Tumor | TCGA-AX-A1CC-01A-11R-A136-13 | TCGA-AX-A1CC |
| TCGA-UCEC | Primary Tumor | TCGA-AX-A1CE-01A-11R-A136-13 | TCGA-AX-A1CE |
| TCGA-UCEC | Primary Tumor | TCGA-AX-A1CF-01A-11R-A136-13 | TCGA-AX-A1CF |
| TCGA-UCEC | Primary Tumor | TCGA-AX-A1CI-01A-11R-A136-13 | TCGA-AX-A1CI |
| TCGA-UCEC | Primary Tumor | TCGA-AX-A1CJ-01A-11R-A136-13 | TCGA-AX-A1CJ |
| TCGA-UCEC | Primary Tumor | TCGA-AX-A1CK-01A-11R-A136-13 | TCGA-AX-A1CK |
| TCGA-UCEC | Primary Tumor | TCGA-AX-A1CN-01A-11R-A136-13 | TCGA-AX-A1CN |
| TCGA-UCEC | Primary Tumor | TCGA-AX-A1CP-01A-11R-A136-13 | TCGA-AX-A1CP |
| TCGA-UCEC | Primary Tumor | TCGA-AX-A1CR-01A-12R-A136-13 | TCGA-AX-A1CR |
| TCGA-UCEC | Primary Tumor | TCGA-AX-A2H2-01A-11R-A17X-13 | TCGA-AX-A2H2 |
| TCGA-UCEC | Primary Tumor | TCGA-AX-A2H4-01A-21R-A18L-13 | TCGA-AX-A2H4 |
| TCGA-UCEC | Primary Tumor | TCGA-AX-A2H5-01A-11R-A17A-13 | TCGA-AX-A2H5 |
| TCGA-UCEC | Primary Tumor | TCGA-AX-A2H7-01A-12R-A18L-13 | TCGA-AX-A2H7 |
| TCGA-UCEC | Primary Tumor | TCGA-AX-A2H8-01A-11R-A17A-13 | TCGA-AX-A2H8 |
| TCGA-UCEC | Primary Tumor | TCGA-AX-A2HA-01A-12R-A18L-13 | TCGA-AX-A2HA |
| TCGA-UCEC | Primary Tumor | TCGA-AX-A2HC-01A-11R-A17A-13 | TCGA-AX-A2HC |
| TCGA-UCEC | Primary Tumor | TCGA-AX-A2HD-01A-21R-A17A-13 | TCGA-AX-A2HD |
| TCGA-UCEC | Primary Tumor | TCGA-AX-A2HF-01A-11R-A17A-13 | TCGA-AX-A2HF |
| TCGA-UCEC | Primary Tumor | TCGA-AX-A2HG-01A-11R-A17A-13 | TCGA-AX-A2HG |
| TCGA-UCEC | Primary Tumor | TCGA-AX-A2HH-01A-11R-A17A-13 | TCGA-AX-A2HH |
| TCGA-UCEC | Primary Tumor | TCGA-AX-A2HJ-01A-11R-A17A-13 | TCGA-AX-A2HJ |
| TCGA-UCEC | Primary Tumor | TCGA-AX-A2HK-01A-11R-A17A-13 | TCGA-AX-A2HK |
| TCGA-UCEC | Primary Tumor | TCGA-AX-A2IN-01A-12R-A17X-13 | TCGA-AX-A2IN |
| TCGA-UCEC | Primary Tumor | TCGA-AX-A2IO-01A-11R-A17X-13 | TCGA-AX-A2IO |
| TCGA-UCEC | Primary Tumor | TCGA-AX-A3FS-01A-11R-A22I-13 | TCGA-AX-A3FS |
| TCGA-UCEC | Primary Tumor | TCGA-AX-A3FT-01A-11R-A22I-13 | TCGA-AX-A3FT |
| TCGA-UCEC | Primary Tumor | TCGA-AX-A3FV-01A-11R-A22I-13 | TCGA-AX-A3FV |
| TCGA-UCEC | Primary Tumor | TCGA-AX-A3FW-01A-11R-A22I-13 | TCGA-AX-A3FW |
| TCGA-UCEC | Primary Tumor | TCGA-AX-A3FX-01A-11R-A22I-13 | TCGA-AX-A3FX |
| TCGA-UCEC | Primary Tumor | TCGA-AX-A3FZ-01A-11R-A22I-13 | TCGA-AX-A3FZ |



|           |               |                              |              |
|-----------|---------------|------------------------------|--------------|
| TCGA-UCEC | Primary Tumor | TCGA-AX-A3G1-01A-11R-A22I-13 | TCGA-AX-A3G1 |
| TCGA-UCEC | Primary Tumor | TCGA-AX-A3G3-01A-11R-A214-13 | TCGA-AX-A3G3 |
| TCGA-UCEC | Primary Tumor | TCGA-AX-A3G4-01A-11R-A214-13 | TCGA-AX-A3G4 |
| TCGA-UCEC | Primary Tumor | TCGA-AX-A3G6-01A-11R-A214-13 | TCGA-AX-A3G6 |
| TCGA-UCEC | Primary Tumor | TCGA-AX-A3G7-01A-12R-A214-13 | TCGA-AX-A3G7 |
| TCGA-UCEC | Primary Tumor | TCGA-AX-A3G8-01A-11R-A22I-13 | TCGA-AX-A3G8 |
| TCGA-UCEC | Primary Tumor | TCGA-AX-A3G9-01A-11R-A22I-13 | TCGA-AX-A3G9 |
| TCGA-UCEC | Primary Tumor | TCGA-AX-A3GB-01A-11R-A22I-13 | TCGA-AX-A3GB |
| TCGA-UCEC | Primary Tumor | TCGA-AX-A3GI-01A-11R-A214-13 | TCGA-AX-A3GI |
| TCGA-UCEC | Primary Tumor | TCGA-B5-A0JN-01A-11R-A103-13 | TCGA-B5-A0JN |
| TCGA-UCEC | Primary Tumor | TCGA-B5-A0JR-01A-13R-A041-13 | TCGA-B5-A0JR |
| TCGA-UCEC | Primary Tumor | TCGA-B5-A0JS-01A-11R-A103-13 | TCGA-B5-A0JS |
| TCGA-UCEC | Primary Tumor | TCGA-B5-A0JT-01A-21R-A119-13 | TCGA-B5-A0JT |
| TCGA-UCEC | Primary Tumor | TCGA-B5-A0JU-01B-11R-A14C-13 | TCGA-B5-A0JU |
| TCGA-UCEC | Primary Tumor | TCGA-B5-A0JV-01A-11R-A103-13 | TCGA-B5-A0JV |
| TCGA-UCEC | Primary Tumor | TCGA-B5-A0JX-01A-21R-A14L-13 | TCGA-B5-A0JX |
| TCGA-UCEC | Primary Tumor | TCGA-B5-A0JY-01A-11R-A103-13 | TCGA-B5-A0JY |
| TCGA-UCEC | Primary Tumor | TCGA-B5-A0JZ-01A-11R-A041-13 | TCGA-B5-A0JZ |
| TCGA-UCEC | Primary Tumor | TCGA-B5-A0K0-01A-11R-A041-13 | TCGA-B5-A0K0 |
| TCGA-UCEC | Primary Tumor | TCGA-B5-A0K1-01A-11R-A041-13 | TCGA-B5-A0K1 |
| TCGA-UCEC | Primary Tumor | TCGA-B5-A0K2-01A-12R-A103-13 | TCGA-B5-A0K2 |
| TCGA-UCEC | Primary Tumor | TCGA-B5-A0K3-01A-11R-A041-13 | TCGA-B5-A0K3 |
| TCGA-UCEC | Primary Tumor | TCGA-B5-A0K4-01A-11R-A041-13 | TCGA-B5-A0K4 |
| TCGA-UCEC | Primary Tumor | TCGA-B5-A0K6-01A-11R-A041-13 | TCGA-B5-A0K6 |
| TCGA-UCEC | Primary Tumor | TCGA-B5-A0K7-01A-11R-A103-13 | TCGA-B5-A0K7 |
| TCGA-UCEC | Primary Tumor | TCGA-B5-A0K8-01A-11R-A14L-13 | TCGA-B5-A0K8 |
| TCGA-UCEC | Primary Tumor | TCGA-B5-A0K9-01A-21R-A103-13 | TCGA-B5-A0K9 |
| TCGA-UCEC | Primary Tumor | TCGA-B5-A0KB-01B-11R-A14C-13 | TCGA-B5-A0KB |
| TCGA-UCEC | Primary Tumor | TCGA-B5-A11E-01A-11R-A10I-13 | TCGA-B5-A11E |
| TCGA-UCEC | Primary Tumor | TCGA-B5-A11F-01A-11R-A10I-13 | TCGA-B5-A11F |
| TCGA-UCEC | Primary Tumor | TCGA-B5-A11G-01A-13R-A119-13 | TCGA-B5-A11G |
| TCGA-UCEC | Primary Tumor | TCGA-B5-A11H-01A-11R-A119-13 | TCGA-B5-A11H |
| TCGA-UCEC | Primary Tumor | TCGA-B5-A11I-01A-11R-A10I-13 | TCGA-B5-A11I |
| TCGA-UCEC | Primary Tumor | TCGA-B5-A11J-01A-11R-A119-13 | TCGA-B5-A11J |
| TCGA-UCEC | Primary Tumor | TCGA-B5-A11L-01B-21R-A13R-13 | TCGA-B5-A11L |
| TCGA-UCEC | Primary Tumor | TCGA-B5-A11M-01A-11R-A119-13 | TCGA-B5-A11M |
| TCGA-UCEC | Primary Tumor | TCGA-B5-A11N-01A-11R-A119-13 | TCGA-B5-A11N |
| TCGA-UCEC | Primary Tumor | TCGA-B5-A11O-01A-11R-A119-13 | TCGA-B5-A11O |
| TCGA-UCEC | Primary Tumor | TCGA-B5-A11P-01B-11R-A14C-13 | TCGA-B5-A11P |
| TCGA-UCEC | Primary Tumor | TCGA-B5-A11Q-01A-11R-A119-13 | TCGA-B5-A11Q |
| TCGA-UCEC | Primary Tumor | TCGA-B5-A11R-01A-11R-A119-13 | TCGA-B5-A11R |
| TCGA-UCEC | Primary Tumor | TCGA-B5-A11S-01A-11R-A119-13 | TCGA-B5-A11S |
| TCGA-UCEC | Primary Tumor | TCGA-B5-A11U-01A-11R-A119-13 | TCGA-B5-A11U |
| TCGA-UCEC | Primary Tumor | TCGA-B5-A11V-01A-11R-A10I-13 | TCGA-B5-A11V |
| TCGA-UCEC | Primary Tumor | TCGA-B5-A11W-01A-12R-A119-13 | TCGA-B5-A11W |
| TCGA-UCEC | Primary Tumor | TCGA-B5-A11X-01A-11R-A10I-13 | TCGA-B5-A11X |
| TCGA-UCEC | Primary Tumor | TCGA-B5-A11Y-01A-21R-A10I-13 | TCGA-B5-A11Y |
| TCGA-UCEC | Primary Tumor | TCGA-B5-A11Z-01A-11R-A10I-13 | TCGA-B5-A11Z |
| TCGA-UCEC | Primary Tumor | TCGA-B5-A12I-01A-31R-A119-13 | TCGA-B5-A12I |
| TCGA-UCEC | Primary Tumor | TCGA-B5-A1MR-01A-31R-A14C-13 | TCGA-B5-A1MR |
| TCGA-UCEC | Primary Tumor | TCGA-B5-A1MS-01B-11R-A22I-13 | TCGA-B5-A1MS |
| TCGA-UCEC | Primary Tumor | TCGA-B5-A1MU-01A-11R-A13R-13 | TCGA-B5-A1MU |
| TCGA-UCEC | Primary Tumor | TCGA-B5-A1MV-01A-31R-A14C-13 | TCGA-B5-A1MV |
| TCGA-UCEC | Primary Tumor | TCGA-B5-A1MW-01A-11R-A17A-13 | TCGA-B5-A1MW |
| TCGA-UCEC | Primary Tumor | TCGA-B5-A1MX-01A-11R-A143-13 | TCGA-B5-A1MX |
| TCGA-UCEC | Primary Tumor | TCGA-B5-A1MY-01A-11R-A143-13 | TCGA-B5-A1MY |
| TCGA-UCEC | Primary Tumor | TCGA-B5-A1MZ-01A-11R-A143-13 | TCGA-B5-A1MZ |
| TCGA-UCEC | Primary Tumor | TCGA-B5-A1N2-01A-21R-A143-13 | TCGA-B5-A1N2 |
| TCGA-UCEC | Primary Tumor | TCGA-B5-A3F9-01A-21R-A22I-13 | TCGA-B5-A3F9 |

|           |               |                              |              |
|-----------|---------------|------------------------------|--------------|
| TCGA-UCEC | Primary Tumor | TCGA-B5-A3FA-01A-11R-A19V-13 | TCGA-B5-A3FA |
| TCGA-UCEC | Primary Tumor | TCGA-B5-A3FB-01A-11R-A19V-13 | TCGA-B5-A3FB |
| TCGA-UCEC | Primary Tumor | TCGA-B5-A3FC-01A-11R-A22I-13 | TCGA-B5-A3FC |
| TCGA-UCEC | Primary Tumor | TCGA-B5-A3FD-01A-11R-A19V-13 | TCGA-B5-A3FD |
| TCGA-UCEC | Primary Tumor | TCGA-B5-A3FH-01A-11R-A19V-13 | TCGA-B5-A3FH |
| TCGA-UCEC | Primary Tumor | TCGA-B5-A3S1-01A-11R-A22I-13 | TCGA-B5-A3S1 |
| TCGA-UCEC | Primary Tumor | TCGA-B5-A5OC-01A-21R-A27R-13 | TCGA-B5-A5OC |
| TCGA-UCEC | Primary Tumor | TCGA-B5-A5OD-01A-11R-A31S-13 | TCGA-B5-A5OD |
| TCGA-UCEC | Primary Tumor | TCGA-B5-A5OE-01A-11R-A31S-13 | TCGA-B5-A5OE |
| TCGA-UCEC | Primary Tumor | TCGA-BG-A0LW-01A-11R-A041-13 | TCGA-BG-A0LW |
| TCGA-UCEC | Primary Tumor | TCGA-BG-A0LX-01A-11R-A041-13 | TCGA-BG-A0LX |
| TCGA-UCEC | Primary Tumor | TCGA-BG-A0M0-01A-11R-A103-13 | TCGA-BG-A0M0 |
| TCGA-UCEC | Primary Tumor | TCGA-BG-A0M2-01A-11R-A103-13 | TCGA-BG-A0M2 |
| TCGA-UCEC | Primary Tumor | TCGA-BG-A0M3-01A-11R-A103-13 | TCGA-BG-A0M3 |
| TCGA-UCEC | Primary Tumor | TCGA-BG-A0M4-01A-11R-A103-13 | TCGA-BG-A0M4 |
| TCGA-UCEC | Primary Tumor | TCGA-BG-A0M6-01A-31R-A103-13 | TCGA-BG-A0M6 |
| TCGA-UCEC | Primary Tumor | TCGA-BG-A0M7-01A-11R-A041-13 | TCGA-BG-A0M7 |
| TCGA-UCEC | Primary Tumor | TCGA-BG-A0M8-01A-12R-A103-13 | TCGA-BG-A0M8 |
| TCGA-UCEC | Primary Tumor | TCGA-BG-A0M9-01A-21R-A103-13 | TCGA-BG-A0M9 |
| TCGA-UCEC | Primary Tumor | TCGA-BG-A0MA-01A-11R-A17A-13 | TCGA-BG-A0MA |
| TCGA-UCEC | Primary Tumor | TCGA-BG-A0MC-01A-21R-A041-13 | TCGA-BG-A0MC |
| TCGA-UCEC | Primary Tumor | TCGA-BG-A0MG-01A-21R-A103-13 | TCGA-BG-A0MG |
| TCGA-UCEC | Primary Tumor | TCGA-BG-A0MH-01A-11R-A119-13 | TCGA-BG-A0MH |
| TCGA-UCEC | Primary Tumor | TCGA-BG-A0MI-01A-11R-A041-13 | TCGA-BG-A0MI |
| TCGA-UCEC | Primary Tumor | TCGA-BG-A0MK-01A-51R-A19V-13 | TCGA-BG-A0MK |
| TCGA-UCEC | Primary Tumor | TCGA-BG-A0MO-01A-11R-A041-13 | TCGA-BG-A0MO |
| TCGA-UCEC | Primary Tumor | TCGA-BG-A0MQ-01A-11R-A103-13 | TCGA-BG-A0MQ |
| TCGA-UCEC | Primary Tumor | TCGA-BG-A0MS-01A-11R-A103-13 | TCGA-BG-A0MS |
| TCGA-UCEC | Primary Tumor | TCGA-BG-A0MT-01A-11R-A103-13 | TCGA-BG-A0MT |
| TCGA-UCEC | Primary Tumor | TCGA-BG-A0MU-01A-11R-A103-13 | TCGA-BG-A0MU |
| TCGA-UCEC | Primary Tumor | TCGA-BG-A0RY-01A-11R-A103-13 | TCGA-BG-A0RY |
| TCGA-UCEC | Primary Tumor | TCGA-BG-A0VT-01A-11R-A10I-13 | TCGA-BG-A0VT |
| TCGA-UCEC | Primary Tumor | TCGA-BG-A0VV-01A-21R-A119-13 | TCGA-BG-A0VV |
| TCGA-UCEC | Primary Tumor | TCGA-BG-A0VW-01A-11R-A119-13 | TCGA-BG-A0VW |
| TCGA-UCEC | Primary Tumor | TCGA-BG-A0VX-01A-11R-A119-13 | TCGA-BG-A0VX |
| TCGA-UCEC | Primary Tumor | TCGA-BG-A0VZ-01A-11R-A108-13 | TCGA-BG-A0VZ |
| TCGA-UCEC | Primary Tumor | TCGA-BG-A0W1-01A-12R-A108-13 | TCGA-BG-A0W1 |
| TCGA-UCEC | Primary Tumor | TCGA-BG-A0W2-01A-11R-A108-13 | TCGA-BG-A0W2 |
| TCGA-UCEC | Primary Tumor | TCGA-BG-A0YU-01A-21R-A10I-13 | TCGA-BG-A0YU |
| TCGA-UCEC | Primary Tumor | TCGA-BG-A0YV-01A-11R-A10I-13 | TCGA-BG-A0YV |
| TCGA-UCEC | Primary Tumor | TCGA-BG-A186-01A-11R-A12H-13 | TCGA-BG-A186 |
| TCGA-UCEC | Primary Tumor | TCGA-BG-A187-01A-11R-A12H-13 | TCGA-BG-A187 |
| TCGA-UCEC | Primary Tumor | TCGA-BG-A18A-01A-21R-A12H-13 | TCGA-BG-A18A |
| TCGA-UCEC | Primary Tumor | TCGA-BG-A18B-01A-11R-A12H-13 | TCGA-BG-A18B |
| TCGA-UCEC | Primary Tumor | TCGA-BG-A18C-01A-11R-A12H-13 | TCGA-BG-A18C |
| TCGA-UCEC | Primary Tumor | TCGA-BG-A221-01A-21R-A156-13 | TCGA-BG-A221 |
| TCGA-UCEC | Primary Tumor | TCGA-BG-A222-01A-11R-A156-13 | TCGA-BG-A222 |
| TCGA-UCEC | Primary Tumor | TCGA-BG-A2AD-01A-21R-A16E-13 | TCGA-BG-A2AD |
| TCGA-UCEC | Primary Tumor | TCGA-BG-A2AE-01A-11R-A16E-13 | TCGA-BG-A2AE |
| TCGA-UCEC | Primary Tumor | TCGA-BG-A2L7-01A-11R-A18L-13 | TCGA-BG-A2L7 |
| TCGA-UCEC | Primary Tumor | TCGA-BG-A3EW-01A-11R-A22I-13 | TCGA-BG-A3EW |
| TCGA-UCEC | Primary Tumor | TCGA-BG-A3PP-01A-11R-A22I-13 | TCGA-BG-A3PP |
| TCGA-UCEC | Primary Tumor | TCGA-BK-A0C9-01A-11R-A00W-13 | TCGA-BK-A0C9 |
| TCGA-UCEC | Primary Tumor | TCGA-BK-A0CA-01A-21R-A119-13 | TCGA-BK-A0CA |
| TCGA-UCEC | Primary Tumor | TCGA-BK-A0CA-01A-21R-A27D-13 | TCGA-BK-A0CA |
| TCGA-UCEC | Primary Tumor | TCGA-BK-A0CA-01B-02R-A27D-13 | TCGA-BK-A0CA |
| TCGA-UCEC | Primary Tumor | TCGA-BK-A0CC-01A-21R-A00W-13 | TCGA-BK-A0CC |
| TCGA-UCEC | Primary Tumor | TCGA-BK-A0CC-01A-21R-A27D-13 | TCGA-BK-A0CC |
| TCGA-UCEC | Primary Tumor | TCGA-BK-A0CC-01B-04R-A27D-13 | TCGA-BK-A0CC |

|           |               |                              |              |
|-----------|---------------|------------------------------|--------------|
| TCGA-UCEC | Primary Tumor | TCGA-BK-A139-01A-11R-A119-13 | TCGA-BK-A139 |
| TCGA-UCEC | Primary Tumor | TCGA-BK-A139-01A-11R-A27D-13 | TCGA-BK-A139 |
| TCGA-UCEC | Primary Tumor | TCGA-BK-A13B-01A-51R-A22I-13 | TCGA-BK-A13B |
| TCGA-UCEC | Primary Tumor | TCGA-BK-A13C-01A-11R-A119-13 | TCGA-BK-A13C |
| TCGA-UCEC | Primary Tumor | TCGA-BK-A26L-01A-11R-A16E-13 | TCGA-BK-A26L |
| TCGA-UCEC | Primary Tumor | TCGA-BK-A26L-01A-11R-A27D-13 | TCGA-BK-A26L |
| TCGA-UCEC | Primary Tumor | TCGA-BK-A26L-01C-04R-A27D-13 | TCGA-BK-A26L |
| TCGA-UCEC | Primary Tumor | TCGA-BK-A4ZD-01A-11R-A27R-13 | TCGA-BK-A4ZD |
| TCGA-UCEC | Primary Tumor | TCGA-BK-A56F-01A-32R-A27R-13 | TCGA-BK-A56F |
| TCGA-UCEC | Primary Tumor | TCGA-BK-A6W3-01A-12R-A34O-13 | TCGA-BK-A6W3 |
| TCGA-UCEC | Primary Tumor | TCGA-BK-A6W4-01A-12R-A34O-13 | TCGA-BK-A6W4 |
| TCGA-UCEC | Primary Tumor | TCGA-BS-A0T9-01A-11R-A12H-13 | TCGA-BS-A0T9 |
| TCGA-UCEC | Primary Tumor | TCGA-BS-A0TA-01A-11R-A103-13 | TCGA-BS-A0TA |
| TCGA-UCEC | Primary Tumor | TCGA-BS-A0TC-01A-11R-A103-13 | TCGA-BS-A0TC |
| TCGA-UCEC | Primary Tumor | TCGA-BS-A0TD-01A-11R-A103-13 | TCGA-BS-A0TD |
| TCGA-UCEC | Primary Tumor | TCGA-BS-A0TE-01A-11R-A103-13 | TCGA-BS-A0TE |
| TCGA-UCEC | Primary Tumor | TCGA-BS-A0TG-01A-32R-A103-13 | TCGA-BS-A0TG |
| TCGA-UCEC | Primary Tumor | TCGA-BS-A0TI-01A-11R-A103-13 | TCGA-BS-A0TI |
| TCGA-UCEC | Primary Tumor | TCGA-BS-A0TJ-01A-11R-A103-13 | TCGA-BS-A0TJ |
| TCGA-UCEC | Primary Tumor | TCGA-BS-A0U5-01A-11R-A108-13 | TCGA-BS-A0U5 |
| TCGA-UCEC | Primary Tumor | TCGA-BS-A0U7-01A-21R-A103-13 | TCGA-BS-A0U7 |
| TCGA-UCEC | Primary Tumor | TCGA-BS-A0U8-01A-11R-A103-13 | TCGA-BS-A0U8 |
| TCGA-UCEC | Primary Tumor | TCGA-BS-A0U9-01B-21R-A10I-13 | TCGA-BS-A0U9 |
| TCGA-UCEC | Primary Tumor | TCGA-BS-A0UA-01A-11R-A119-13 | TCGA-BS-A0UA |
| TCGA-UCEC | Primary Tumor | TCGA-BS-A0UF-01A-11R-A103-13 | TCGA-BS-A0UF |
| TCGA-UCEC | Primary Tumor | TCGA-BS-A0UJ-01A-12R-A103-13 | TCGA-BS-A0UJ |
| TCGA-UCEC | Primary Tumor | TCGA-BS-A0UL-01A-11R-A108-13 | TCGA-BS-A0UL |
| TCGA-UCEC | Primary Tumor | TCGA-BS-A0UM-01A-11R-A103-13 | TCGA-BS-A0UM |
| TCGA-UCEC | Primary Tumor | TCGA-BS-A0UT-01A-11R-A103-13 | TCGA-BS-A0UT |
| TCGA-UCEC | Primary Tumor | TCGA-BS-A0UV-01A-11R-A103-13 | TCGA-BS-A0UV |
| TCGA-UCEC | Primary Tumor | TCGA-BS-A0V4-01A-11R-A14C-13 | TCGA-BS-A0V4 |
| TCGA-UCEC | Primary Tumor | TCGA-BS-A0V6-01A-11R-A119-13 | TCGA-BS-A0V6 |
| TCGA-UCEC | Primary Tumor | TCGA-BS-A0V7-01A-21R-A119-13 | TCGA-BS-A0V7 |
| TCGA-UCEC | Primary Tumor | TCGA-BS-A0V8-01A-11R-A119-13 | TCGA-BS-A0V8 |
| TCGA-UCEC | Primary Tumor | TCGA-BS-A0VI-01A-11R-A14C-13 | TCGA-BS-A0VI |
| TCGA-UCEC | Primary Tumor | TCGA-BS-A0WQ-01A-21R-A108-13 | TCGA-BS-A0WQ |
| TCGA-UCEC | Primary Tumor | TCGA-D1-A0ZN-01A-11R-A119-13 | TCGA-D1-A0ZN |
| TCGA-UCEC | Primary Tumor | TCGA-D1-A0ZO-01A-11R-A119-13 | TCGA-D1-A0ZO |
| TCGA-UCEC | Primary Tumor | TCGA-D1-A0ZP-01A-21R-A10I-13 | TCGA-D1-A0ZP |
| TCGA-UCEC | Primary Tumor | TCGA-D1-A0ZQ-01A-11R-A119-13 | TCGA-D1-A0ZQ |
| TCGA-UCEC | Primary Tumor | TCGA-D1-A0ZR-01A-21R-A10I-13 | TCGA-D1-A0ZR |
| TCGA-UCEC | Primary Tumor | TCGA-D1-A0ZS-01A-11R-A119-13 | TCGA-D1-A0ZS |
| TCGA-UCEC | Primary Tumor | TCGA-D1-A0ZU-01A-11R-A10I-13 | TCGA-D1-A0ZU |
| TCGA-UCEC | Primary Tumor | TCGA-D1-A0ZV-01A-11R-A10I-13 | TCGA-D1-A0ZV |
| TCGA-UCEC | Primary Tumor | TCGA-D1-A0ZZ-01A-11R-A10I-13 | TCGA-D1-A0ZZ |
| TCGA-UCEC | Primary Tumor | TCGA-D1-A101-01A-12R-A10I-13 | TCGA-D1-A101 |
| TCGA-UCEC | Primary Tumor | TCGA-D1-A102-01A-11R-A10I-13 | TCGA-D1-A102 |
| TCGA-UCEC | Primary Tumor | TCGA-D1-A103-01A-11R-A10I-13 | TCGA-D1-A103 |
| TCGA-UCEC | Primary Tumor | TCGA-D1-A15V-01A-11R-A119-13 | TCGA-D1-A15V |
| TCGA-UCEC | Primary Tumor | TCGA-D1-A15W-01A-11R-A119-13 | TCGA-D1-A15W |
| TCGA-UCEC | Primary Tumor | TCGA-D1-A15X-01A-11R-A119-13 | TCGA-D1-A15X |
| TCGA-UCEC | Primary Tumor | TCGA-D1-A15Z-01A-11R-A119-13 | TCGA-D1-A15Z |
| TCGA-UCEC | Primary Tumor | TCGA-D1-A160-01A-11R-A119-13 | TCGA-D1-A160 |
| TCGA-UCEC | Primary Tumor | TCGA-D1-A161-01A-11R-A119-13 | TCGA-D1-A161 |
| TCGA-UCEC | Primary Tumor | TCGA-D1-A162-01A-11R-A119-13 | TCGA-D1-A162 |
| TCGA-UCEC | Primary Tumor | TCGA-D1-A163-01A-11R-A12H-13 | TCGA-D1-A163 |
| TCGA-UCEC | Primary Tumor | TCGA-D1-A165-01A-11R-A12H-13 | TCGA-D1-A165 |
| TCGA-UCEC | Primary Tumor | TCGA-D1-A167-01A-11R-A12H-13 | TCGA-D1-A167 |
| TCGA-UCEC | Primary Tumor | TCGA-D1-A168-01A-31R-A12H-13 | TCGA-D1-A168 |

|           |               |                              |              |
|-----------|---------------|------------------------------|--------------|
| TCGA-UCEC | Primary Tumor | TCGA-D1-A169-01A-11R-A12H-13 | TCGA-D1-A169 |
| TCGA-UCEC | Primary Tumor | TCGA-D1-A16B-01A-11R-A12H-13 | TCGA-D1-A16B |
| TCGA-UCEC | Primary Tumor | TCGA-D1-A16D-01A-11R-A12H-13 | TCGA-D1-A16D |
| TCGA-UCEC | Primary Tumor | TCGA-D1-A16E-01A-22R-A12H-13 | TCGA-D1-A16E |
| TCGA-UCEC | Primary Tumor | TCGA-D1-A16F-01A-11R-A12H-13 | TCGA-D1-A16F |
| TCGA-UCEC | Primary Tumor | TCGA-D1-A16G-01A-31R-A12H-13 | TCGA-D1-A16G |
| TCGA-UCEC | Primary Tumor | TCGA-D1-A16I-01A-11R-A12H-13 | TCGA-D1-A16I |
| TCGA-UCEC | Primary Tumor | TCGA-D1-A16J-01A-11R-A12H-13 | TCGA-D1-A16J |
| TCGA-UCEC | Primary Tumor | TCGA-D1-A16N-01A-11R-A12H-13 | TCGA-D1-A16N |
| TCGA-UCEC | Primary Tumor | TCGA-D1-A16O-01A-11R-A12H-13 | TCGA-D1-A16O |
| TCGA-UCEC | Primary Tumor | TCGA-D1-A16Q-01A-12R-A12H-13 | TCGA-D1-A16Q |
| TCGA-UCEC | Primary Tumor | TCGA-D1-A16R-01A-11R-A12H-13 | TCGA-D1-A16R |
| TCGA-UCEC | Primary Tumor | TCGA-D1-A16S-01A-11R-A12H-13 | TCGA-D1-A16S |
| TCGA-UCEC | Primary Tumor | TCGA-D1-A16V-01A-11R-A12H-13 | TCGA-D1-A16V |
| TCGA-UCEC | Primary Tumor | TCGA-D1-A16X-01A-11R-A12H-13 | TCGA-D1-A16X |
| TCGA-UCEC | Primary Tumor | TCGA-D1-A16Y-01A-31R-A12H-13 | TCGA-D1-A16Y |
| TCGA-UCEC | Primary Tumor | TCGA-D1-A174-01A-11R-A12H-13 | TCGA-D1-A174 |
| TCGA-UCEC | Primary Tumor | TCGA-D1-A175-01A-11R-A12H-13 | TCGA-D1-A175 |
| TCGA-UCEC | Primary Tumor | TCGA-D1-A176-01A-11R-A12H-13 | TCGA-D1-A176 |
| TCGA-UCEC | Primary Tumor | TCGA-D1-A177-01A-21R-A12H-13 | TCGA-D1-A177 |
| TCGA-UCEC | Primary Tumor | TCGA-D1-A179-01A-11R-A12H-13 | TCGA-D1-A179 |
| TCGA-UCEC | Primary Tumor | TCGA-D1-A17A-01A-11R-A12H-13 | TCGA-D1-A17A |
| TCGA-UCEC | Primary Tumor | TCGA-D1-A17B-01A-22R-A12H-13 | TCGA-D1-A17B |
| TCGA-UCEC | Primary Tumor | TCGA-D1-A17C-01A-11R-A12H-13 | TCGA-D1-A17C |
| TCGA-UCEC | Primary Tumor | TCGA-D1-A17D-01A-12R-A12H-13 | TCGA-D1-A17D |
| TCGA-UCEC | Primary Tumor | TCGA-D1-A17F-01A-11R-A12H-13 | TCGA-D1-A17F |
| TCGA-UCEC | Primary Tumor | TCGA-D1-A17H-01A-11R-A12H-13 | TCGA-D1-A17H |
| TCGA-UCEC | Primary Tumor | TCGA-D1-A17K-01A-11R-A12H-13 | TCGA-D1-A17K |
| TCGA-UCEC | Primary Tumor | TCGA-D1-A17L-01A-11R-A12H-13 | TCGA-D1-A17L |
| TCGA-UCEC | Primary Tumor | TCGA-D1-A17M-01A-21R-A12H-13 | TCGA-D1-A17M |
| TCGA-UCEC | Primary Tumor | TCGA-D1-A17N-01A-11R-A12H-13 | TCGA-D1-A17N |
| TCGA-UCEC | Primary Tumor | TCGA-D1-A17Q-01A-11R-A12H-13 | TCGA-D1-A17Q |
| TCGA-UCEC | Primary Tumor | TCGA-D1-A17R-01A-11R-A12H-13 | TCGA-D1-A17R |
| TCGA-UCEC | Primary Tumor | TCGA-D1-A17S-01A-11R-A12H-13 | TCGA-D1-A17S |
| TCGA-UCEC | Primary Tumor | TCGA-D1-A17T-01A-11R-A12H-13 | TCGA-D1-A17T |
| TCGA-UCEC | Primary Tumor | TCGA-D1-A17U-01A-21R-A12H-13 | TCGA-D1-A17U |
| TCGA-UCEC | Primary Tumor | TCGA-D1-A1NS-01A-11R-A14C-13 | TCGA-D1-A1NS |
| TCGA-UCEC | Primary Tumor | TCGA-D1-A1NU-01A-11R-A14C-13 | TCGA-D1-A1NU |
| TCGA-UCEC | Primary Tumor | TCGA-D1-A1NW-01A-11R-A14L-13 | TCGA-D1-A1NW |
| TCGA-UCEC | Primary Tumor | TCGA-D1-A1NX-01A-11R-A16E-13 | TCGA-D1-A1NX |
| TCGA-UCEC | Primary Tumor | TCGA-D1-A1NY-01A-11R-A16E-13 | TCGA-D1-A1NY |
| TCGA-UCEC | Primary Tumor | TCGA-D1-A1NZ-01A-21R-A14C-13 | TCGA-D1-A1NZ |
| TCGA-UCEC | Primary Tumor | TCGA-D1-A1O0-01A-11R-A17A-13 | TCGA-D1-A1O0 |
| TCGA-UCEC | Primary Tumor | TCGA-D1-A1O5-01A-11R-A14C-13 | TCGA-D1-A1O5 |
| TCGA-UCEC | Primary Tumor | TCGA-D1-A1O7-01A-11R-A14C-13 | TCGA-D1-A1O7 |
| TCGA-UCEC | Primary Tumor | TCGA-D1-A1O8-01A-11R-A14C-13 | TCGA-D1-A1O8 |
| TCGA-UCEC | Primary Tumor | TCGA-D1-A2G0-01A-11R-A17A-13 | TCGA-D1-A2G0 |
| TCGA-UCEC | Primary Tumor | TCGA-D1-A2G5-01A-11R-A17A-13 | TCGA-D1-A2G5 |
| TCGA-UCEC | Primary Tumor | TCGA-D1-A2G6-01A-11R-A17A-13 | TCGA-D1-A2G6 |
| TCGA-UCEC | Primary Tumor | TCGA-D1-A2G7-01A-21R-A17X-13 | TCGA-D1-A2G7 |
| TCGA-UCEC | Primary Tumor | TCGA-D1-A3DA-01A-12R-A214-13 | TCGA-D1-A3DA |
| TCGA-UCEC | Primary Tumor | TCGA-D1-A3DG-01A-11R-A19V-13 | TCGA-D1-A3DG |
| TCGA-UCEC | Primary Tumor | TCGA-D1-A3DH-01A-11R-A19V-13 | TCGA-D1-A3DH |
| TCGA-UCEC | Primary Tumor | TCGA-D1-A3JP-01A-31R-A22I-13 | TCGA-D1-A3JP |
| TCGA-UCEC | Primary Tumor | TCGA-D1-A3JQ-01A-11R-A22I-13 | TCGA-D1-A3JQ |
| TCGA-UCEC | Primary Tumor | TCGA-D1-A2KN-01A-11R-A17X-13 | TCGA-D1-A2KN |
| TCGA-UCEC | Primary Tumor | TCGA-D1-A2KR-01A-11R-A17X-13 | TCGA-D1-A2KR |
| TCGA-UCEC | Primary Tumor | TCGA-D1-A2KS-01A-11R-A18L-13 | TCGA-D1-A2KS |
| TCGA-UCEC | Primary Tumor | TCGA-D1-A2KU-01A-11R-A17X-13 | TCGA-D1-A2KU |

|           |               |                              |              |
|-----------|---------------|------------------------------|--------------|
| TCGA-UCEC | Primary Tumor | TCGA-DF-A2KV-01A-11R-A17X-13 | TCGA-DF-A2KV |
| TCGA-UCEC | Primary Tumor | TCGA-DF-A2KY-01A-21R-A214-13 | TCGA-DF-A2KY |
| TCGA-UCEC | Primary Tumor | TCGA-DF-A2KZ-01A-11R-A214-13 | TCGA-DF-A2KZ |
| TCGA-UCEC | Primary Tumor | TCGA-DF-A2L0-01A-11R-A17X-13 | TCGA-DF-A2L0 |
| TCGA-UCEC | Primary Tumor | TCGA-DI-A0WH-01A-12R-A12H-13 | TCGA-DI-A0WH |
| TCGA-UCEC | Primary Tumor | TCGA-DI-A1BU-01A-11R-A136-13 | TCGA-DI-A1BU |
| TCGA-UCEC | Primary Tumor | TCGA-DI-A1BY-01A-21R-A136-13 | TCGA-DI-A1BY |
| TCGA-UCEC | Primary Tumor | TCGA-DI-A1C3-01A-41R-A136-13 | TCGA-DI-A1C3 |
| TCGA-UCEC | Primary Tumor | TCGA-DI-A1NN-01A-11R-A16E-13 | TCGA-DI-A1NN |
| TCGA-UCEC | Primary Tumor | TCGA-DI-A1NO-01A-31R-A156-13 | TCGA-DI-A1NO |
| TCGA-UCEC | Primary Tumor | TCGA-DI-A2QT-01A-12R-A19V-13 | TCGA-DI-A2QT |
| TCGA-UCEC | Primary Tumor | TCGA-DI-A2QU-01A-11R-A18L-13 | TCGA-DI-A2QU |
| TCGA-UCEC | Primary Tumor | TCGA-DI-A2QY-01A-12R-A19V-13 | TCGA-DI-A2QY |
| TCGA-UCEC | Primary Tumor | TCGA-E6-A1LX-01A-11R-A14C-13 | TCGA-E6-A1LX |
| TCGA-UCEC | Primary Tumor | TCGA-E6-A1LZ-01A-11R-A143-13 | TCGA-E6-A1LZ |
| TCGA-UCEC | Primary Tumor | TCGA-E6-A1M0-01A-11R-A143-13 | TCGA-E6-A1M0 |
| TCGA-UCEC | Primary Tumor | TCGA-E6-A2P8-01A-11R-A19V-13 | TCGA-E6-A2P8 |
| TCGA-UCEC | Primary Tumor | TCGA-E6-A2P9-01A-11R-A19V-13 | TCGA-E6-A2P9 |
| TCGA-UCEC | Primary Tumor | TCGA-E6-A8L9-01A-21R-A37P-13 | TCGA-E6-A8L9 |
| TCGA-UCEC | Primary Tumor | TCGA-EC-A1NJ-01A-31R-A14C-13 | TCGA-EC-A1NJ |
| TCGA-UCEC | Primary Tumor | TCGA-EC-A1QX-01A-31R-A16E-13 | TCGA-EC-A1QX |
| TCGA-UCEC | Primary Tumor | TCGA-EC-A24G-01A-11R-A16E-13 | TCGA-EC-A24G |
| TCGA-UCEC | Primary Tumor | TCGA-EO-A1Y5-01A-11R-A156-13 | TCGA-EO-A1Y5 |
| TCGA-UCEC | Primary Tumor | TCGA-EO-A1Y7-01A-11R-A156-13 | TCGA-EO-A1Y7 |
| TCGA-UCEC | Primary Tumor | TCGA-EO-A1Y8-01A-11R-A156-13 | TCGA-EO-A1Y8 |
| TCGA-UCEC | Primary Tumor | TCGA-EO-A22R-01A-11R-A18L-13 | TCGA-EO-A22R |
| TCGA-UCEC | Primary Tumor | TCGA-EO-A22S-01A-11R-A18L-13 | TCGA-EO-A22S |
| TCGA-UCEC | Primary Tumor | TCGA-EO-A22T-01A-21R-A18L-13 | TCGA-EO-A22T |
| TCGA-UCEC | Primary Tumor | TCGA-EO-A22U-01A-11R-A17X-13 | TCGA-EO-A22U |
| TCGA-UCEC | Primary Tumor | TCGA-EO-A22X-01A-11R-A17X-13 | TCGA-EO-A22X |
| TCGA-UCEC | Primary Tumor | TCGA-EO-A22Y-01A-11R-A17X-13 | TCGA-EO-A22Y |
| TCGA-UCEC | Primary Tumor | TCGA-EO-A2CG-01A-12R-A17X-13 | TCGA-EO-A2CG |
| TCGA-UCEC | Primary Tumor | TCGA-EO-A2CH-01A-11R-A17X-13 | TCGA-EO-A2CH |
| TCGA-UCEC | Primary Tumor | TCGA-EO-A3AS-01A-11R-A19V-13 | TCGA-EO-A3AS |
| TCGA-UCEC | Primary Tumor | TCGA-EO-A3AU-01A-21R-A19V-13 | TCGA-EO-A3AU |
| TCGA-UCEC | Primary Tumor | TCGA-EO-A3AV-01A-12R-A19V-13 | TCGA-EO-A3AV |
| TCGA-UCEC | Primary Tumor | TCGA-EO-A3AY-01A-12R-A19V-13 | TCGA-EO-A3AY |
| TCGA-UCEC | Primary Tumor | TCGA-EO-A3AZ-01A-12R-A19V-13 | TCGA-EO-A3AZ |
| TCGA-UCEC | Primary Tumor | TCGA-EO-A3B0-01A-12R-A19V-13 | TCGA-EO-A3B0 |
| TCGA-UCEC | Primary Tumor | TCGA-EO-A3B1-01A-12R-A19V-13 | TCGA-EO-A3B1 |
| TCGA-UCEC | Primary Tumor | TCGA-EO-A3KU-01A-11R-A22I-13 | TCGA-EO-A3KU |
| TCGA-UCEC | Primary Tumor | TCGA-EO-A3KW-01A-11R-A22I-13 | TCGA-EO-A3KW |
| TCGA-UCEC | Primary Tumor | TCGA-EO-A3KX-01A-11R-A22I-13 | TCGA-EO-A3KX |
| TCGA-UCEC | Primary Tumor | TCGA-EO-A3L0-01A-11R-A22I-13 | TCGA-EO-A3L0 |
| TCGA-UCEC | Primary Tumor | TCGA-EY-A1G7-01A-11R-A13R-13 | TCGA-EY-A1G7 |
| TCGA-UCEC | Primary Tumor | TCGA-EY-A1G8-01A-11R-A13R-13 | TCGA-EY-A1G8 |
| TCGA-UCEC | Primary Tumor | TCGA-EY-A1GC-01A-11R-A13R-13 | TCGA-EY-A1GC |
| TCGA-UCEC | Primary Tumor | TCGA-EY-A1GD-01A-11R-A13R-13 | TCGA-EY-A1GD |
| TCGA-UCEC | Primary Tumor | TCGA-EY-A1GE-01A-11R-A13R-13 | TCGA-EY-A1GE |
| TCGA-UCEC | Primary Tumor | TCGA-EY-A1GF-01A-11R-A13R-13 | TCGA-EY-A1GF |
| TCGA-UCEC | Primary Tumor | TCGA-EY-A1GH-01A-11R-A13R-13 | TCGA-EY-A1GH |
| TCGA-UCEC | Primary Tumor | TCGA-EY-A1GI-01A-11R-A13R-13 | TCGA-EY-A1GI |
| TCGA-UCEC | Primary Tumor | TCGA-EY-A1GJ-01A-12R-A143-13 | TCGA-EY-A1GJ |
| TCGA-UCEC | Primary Tumor | TCGA-EY-A1GK-01A-11R-A13R-13 | TCGA-EY-A1GK |
| TCGA-UCEC | Primary Tumor | TCGA-EY-A1GL-01A-11R-A13R-13 | TCGA-EY-A1GL |
| TCGA-UCEC | Primary Tumor | TCGA-EY-A1GM-01A-12R-A14C-13 | TCGA-EY-A1GM |
| TCGA-UCEC | Primary Tumor | TCGA-EY-A1GO-01A-11R-A14C-13 | TCGA-EY-A1GO |
| TCGA-UCEC | Primary Tumor | TCGA-EY-A1GP-01A-11R-A13R-13 | TCGA-EY-A1GP |
| TCGA-UCEC | Primary Tumor | TCGA-EY-A1GQ-01A-21R-A13R-13 | TCGA-EY-A1GQ |

|           |               |                              |              |
|-----------|---------------|------------------------------|--------------|
| TCGA-UCEC | Primary Tumor | TCGA-EY-A1GR-01A-11R-A13R-13 | TCGA-EY-A1GR |
| TCGA-UCEC | Primary Tumor | TCGA-EY-A1GS-01A-11R-A13R-13 | TCGA-EY-A1GS |
| TCGA-UCEC | Primary Tumor | TCGA-EY-A1GT-01A-11R-A13R-13 | TCGA-EY-A1GT |
| TCGA-UCEC | Primary Tumor | TCGA-EY-A1GU-01A-11R-A13R-13 | TCGA-EY-A1GU |
| TCGA-UCEC | Primary Tumor | TCGA-EY-A1GV-01A-11R-A13R-13 | TCGA-EY-A1GV |
| TCGA-UCEC | Primary Tumor | TCGA-EY-A1GW-01A-22R-A13R-13 | TCGA-EY-A1GW |
| TCGA-UCEC | Primary Tumor | TCGA-EY-A1GX-01A-12R-A13R-13 | TCGA-EY-A1GX |
| TCGA-UCEC | Primary Tumor | TCGA-EY-A1H0-01A-11R-A13R-13 | TCGA-EY-A1H0 |
| TCGA-UCEC | Primary Tumor | TCGA-EY-A210-01A-11R-A156-13 | TCGA-EY-A210 |
| TCGA-UCEC | Primary Tumor | TCGA-EY-A212-01A-11R-A14L-13 | TCGA-EY-A212 |
| TCGA-UCEC | Primary Tumor | TCGA-EY-A214-01A-12R-A156-13 | TCGA-EY-A214 |
| TCGA-UCEC | Primary Tumor | TCGA-EY-A215-01A-11R-A14L-13 | TCGA-EY-A215 |
| TCGA-UCEC | Primary Tumor | TCGA-EY-A2OM-01A-11R-A18L-13 | TCGA-EY-A2OM |
| TCGA-UCEC | Primary Tumor | TCGA-EY-A2ON-01A-21R-A18L-13 | TCGA-EY-A2ON |
| TCGA-UCEC | Primary Tumor | TCGA-EY-A2OO-01A-11R-A19V-13 | TCGA-EY-A2OO |
| TCGA-UCEC | Primary Tumor | TCGA-EY-A2OP-01A-11R-A19V-13 | TCGA-EY-A2OP |
| TCGA-UCEC | Primary Tumor | TCGA-EY-A2OQ-01A-11R-A19V-13 | TCGA-EY-A2OQ |
| TCGA-UCEC | Primary Tumor | TCGA-EY-A3L3-01A-11R-A22I-13 | TCGA-EY-A3L3 |
| TCGA-UCEC | Primary Tumor | TCGA-EY-A3QX-01A-11R-A22I-13 | TCGA-EY-A3QX |
| TCGA-UCEC | Primary Tumor | TCGA-EY-A4KR-01A-11R-A27R-13 | TCGA-EY-A4KR |
| TCGA-UCEC | Primary Tumor | TCGA-EY-A547-01A-11R-A27R-13 | TCGA-EY-A547 |
| TCGA-UCEC | Primary Tumor | TCGA-EY-A548-01A-11R-A27R-13 | TCGA-EY-A548 |
| TCGA-UCEC | Primary Tumor | TCGA-EY-A549-01A-11R-A27R-13 | TCGA-EY-A549 |
| TCGA-UCEC | Primary Tumor | TCGA-EY-A54A-01A-11R-A27R-13 | TCGA-EY-A54A |
| TCGA-UCEC | Primary Tumor | TCGA-EY-A5W2-01A-11R-A31S-13 | TCGA-EY-A5W2 |
| TCGA-UCEC | Primary Tumor | TCGA-EY-A72D-01A-12R-A34O-13 | TCGA-EY-A72D |
| TCGA-UCEC | Primary Tumor | TCGA-FI-A2CX-01A-11R-A17A-13 | TCGA-FI-A2CX |
| TCGA-UCEC | Primary Tumor | TCGA-FI-A2CY-01A-11R-A17A-13 | TCGA-FI-A2CY |
| TCGA-UCEC | Primary Tumor | TCGA-FI-A2D0-01A-11R-A17A-13 | TCGA-FI-A2D0 |
| TCGA-UCEC | Primary Tumor | TCGA-FI-A2D2-01A-11R-A17A-13 | TCGA-FI-A2D2 |
| TCGA-UCEC | Primary Tumor | TCGA-FI-A2D4-01A-12R-A17A-13 | TCGA-FI-A2D4 |
| TCGA-UCEC | Primary Tumor | TCGA-FI-A2D5-01A-11R-A17A-13 | TCGA-FI-A2D5 |
| TCGA-UCEC | Primary Tumor | TCGA-FI-A2D6-01A-11R-A17A-13 | TCGA-FI-A2D6 |
| TCGA-UCEC | Primary Tumor | TCGA-FI-A2EU-01A-11R-A17A-13 | TCGA-FI-A2EU |
| TCGA-UCEC | Primary Tumor | TCGA-FI-A2EW-01A-11R-A17A-13 | TCGA-FI-A2EW |
| TCGA-UCEC | Primary Tumor | TCGA-FI-A2EX-01A-11R-A17A-13 | TCGA-FI-A2EX |
| TCGA-UCEC | Primary Tumor | TCGA-FI-A2EY-01A-12R-A18L-13 | TCGA-FI-A2EY |
| TCGA-UCEC | Primary Tumor | TCGA-FI-A2F4-01A-11R-A17A-13 | TCGA-FI-A2F4 |
| TCGA-UCEC | Primary Tumor | TCGA-FI-A2F8-01A-12R-A17A-13 | TCGA-FI-A2F8 |
| TCGA-UCEC | Primary Tumor | TCGA-FI-A2F9-01A-11R-A17A-13 | TCGA-FI-A2F9 |
| TCGA-UCEC | Primary Tumor | TCGA-FI-A3PV-01A-11R-A22I-13 | TCGA-FI-A3PV |
| TCGA-UCEC | Primary Tumor | TCGA-FI-A3PX-01A-11R-A22I-13 | TCGA-FI-A3PX |
| TCGA-UCEC | Primary Tumor | TCGA-H5-A2HR-01A-11R-A17X-13 | TCGA-H5-A2HR |
| TCGA-UCEC | Primary Tumor | TCGA-JU-AAVI-01A-11R-A404-13 | TCGA-JU-AAVI |
| TCGA-UCEC | Primary Tumor | TCGA-K6-A3WQ-01A-11R-A22I-13 | TCGA-K6-A3WQ |
| TCGA-UCEC | Primary Tumor | TCGA-KJ-A3U4-01A-11R-A22I-13 | TCGA-KJ-A3U4 |
| TCGA-UCEC | Primary Tumor | TCGA-KP-A3VZ-01A-11R-A22I-13 | TCGA-KP-A3VZ |
| TCGA-UCEC | Primary Tumor | TCGA-KP-A3W0-01A-21R-A22I-13 | TCGA-KP-A3W0 |
| TCGA-UCEC | Primary Tumor | TCGA-KP-A3W1-01A-11R-A22I-13 | TCGA-KP-A3W1 |
| TCGA-UCEC | Primary Tumor | TCGA-KP-A3W3-01A-11R-A22I-13 | TCGA-KP-A3W3 |
| TCGA-UCEC | Primary Tumor | TCGA-KP-A3W4-01A-11R-A22I-13 | TCGA-KP-A3W4 |
| TCGA-UCEC | Primary Tumor | TCGA-PG-A5BC-01A-12R-A27R-13 | TCGA-PG-A5BC |
| TCGA-UCEC | Primary Tumor | TCGA-PG-A6IB-01A-21R-A31S-13 | TCGA-PG-A6IB |
| TCGA-UCEC | Primary Tumor | TCGA-PG-A7D5-01A-11R-A34O-13 | TCGA-PG-A7D5 |
| TCGA-UCEC | Primary Tumor | TCGA-PG-A914-01A-11R-A37P-13 | TCGA-PG-A914 |
| TCGA-UCEC | Primary Tumor | TCGA-PG-A915-01A-11R-A37P-13 | TCGA-PG-A915 |
| TCGA-UCEC | Primary Tumor | TCGA-PG-A916-01A-11R-A37P-13 | TCGA-PG-A916 |
| TCGA-UCEC | Primary Tumor | TCGA-PG-A917-01A-31R-A37P-13 | TCGA-PG-A917 |
| TCGA-UCEC | Primary Tumor | TCGA-QF-A5YS-01A-11R-A31S-13 | TCGA-QF-A5YS |

|           |                     |                              |              |
|-----------|---------------------|------------------------------|--------------|
| TCGA-UCEC | Primary Tumor       | TCGA-QF-A5YT-01A-11R-A31S-13 | TCGA-QF-A5YT |
| TCGA-UCEC | Primary Tumor       | TCGA-QS-A5YQ-01A-11R-A31S-13 | TCGA-QS-A5YQ |
| TCGA-UCEC | Primary Tumor       | TCGA-QS-A5YR-01A-31R-A31S-13 | TCGA-QS-A5YR |
| TCGA-UCEC | Primary Tumor       | TCGA-QS-A744-01A-11R-A34O-13 | TCGA-QS-A744 |
| TCGA-UCEC | Primary Tumor       | TCGA-QS-A8F1-01A-21R-A37P-13 | TCGA-QS-A8F1 |
| TCGA-UCEC | Primary Tumor       | TCGA-SJ-A6ZI-01A-12R-A34O-13 | TCGA-SJ-A6ZI |
| TCGA-UCEC | Primary Tumor       | TCGA-SJ-A6ZJ-01A-12R-A34O-13 | TCGA-SJ-A6ZJ |
| TCGA-UCEC | Primary Tumor       | TCGA-SL-A6J9-01A-11R-A31S-13 | TCGA-SL-A6J9 |
| TCGA-UCEC | Primary Tumor       | TCGA-SL-A6JA-01A-11R-A31S-13 | TCGA-SL-A6JA |
| TCGA-BRCA | Solid Tissue Normal | TCGA-A7-A0CE-11A-21R-A090-13 | TCGA-A7-A0CE |
| TCGA-BRCA | Solid Tissue Normal | TCGA-A7-A0D9-11A-53R-A090-13 | TCGA-A7-A0D9 |
| TCGA-BRCA | Solid Tissue Normal | TCGA-A7-A0DB-11A-33R-A090-13 | TCGA-A7-A0DB |
| TCGA-BRCA | Solid Tissue Normal | TCGA-A7-A0DC-11A-41R-A090-13 | TCGA-A7-A0DC |
| TCGA-BRCA | Solid Tissue Normal | TCGA-A7-A13E-11A-61R-A12O-13 | TCGA-A7-A13E |
| TCGA-BRCA | Solid Tissue Normal | TCGA-A7-A13F-11A-42R-A12O-13 | TCGA-A7-A13F |
| TCGA-BRCA | Solid Tissue Normal | TCGA-A7-A13G-11A-51R-A13P-13 | TCGA-A7-A13G |
| TCGA-BRCA | Solid Tissue Normal | TCGA-AC-A23H-11A-12R-A156-13 | TCGA-AC-A23H |
| TCGA-BRCA | Solid Tissue Normal | TCGA-AC-A2FB-11A-13R-A17A-13 | TCGA-AC-A2FB |
| TCGA-BRCA | Solid Tissue Normal | TCGA-AC-A2FM-11B-32R-A19V-13 | TCGA-AC-A2FM |
| TCGA-BRCA | Solid Tissue Normal | TCGA-BH-A0AU-11A-11R-A12O-13 | TCGA-BH-A0AU |
| TCGA-BRCA | Solid Tissue Normal | TCGA-BH-A0AY-11A-23R-A090-13 | TCGA-BH-A0AY |
| TCGA-BRCA | Solid Tissue Normal | TCGA-BH-A0AZ-11A-22R-A12O-13 | TCGA-BH-A0AZ |
| TCGA-BRCA | Solid Tissue Normal | TCGA-BH-A0B3-11B-21R-A090-13 | TCGA-BH-A0B3 |
| TCGA-BRCA | Solid Tissue Normal | TCGA-BH-A0B5-11A-23R-A12O-13 | TCGA-BH-A0B5 |
| TCGA-BRCA | Solid Tissue Normal | TCGA-BH-A0B7-11A-34R-A114-13 | TCGA-BH-A0B7 |
| TCGA-BRCA | Solid Tissue Normal | TCGA-BH-A0BC-11A-22R-A090-13 | TCGA-BH-A0BC |
| TCGA-BRCA | Solid Tissue Normal | TCGA-BH-A0BJ-11A-23R-A090-13 | TCGA-BH-A0BJ |
| TCGA-BRCA | Solid Tissue Normal | TCGA-BH-A0BQ-11A-33R-A114-13 | TCGA-BH-A0BQ |
| TCGA-BRCA | Solid Tissue Normal | TCGA-BH-A0BS-11A-11R-A12O-13 | TCGA-BH-A0BS |
| TCGA-BRCA | Solid Tissue Normal | TCGA-BH-A0BT-11A-21R-A12O-13 | TCGA-BH-A0BT |
| TCGA-BRCA | Solid Tissue Normal | TCGA-BH-A0BV-11A-31R-A090-13 | TCGA-BH-A0BV |
| TCGA-BRCA | Solid Tissue Normal | TCGA-BH-A0BW-11A-12R-A114-13 | TCGA-BH-A0BW |
| TCGA-BRCA | Solid Tissue Normal | TCGA-BH-A0BZ-11A-61R-A12O-13 | TCGA-BH-A0BZ |
| TCGA-BRCA | Solid Tissue Normal | TCGA-BH-A0C0-11A-21R-A090-13 | TCGA-BH-A0C0 |
| TCGA-BRCA | Solid Tissue Normal | TCGA-BH-A0C3-11A-23R-A12O-13 | TCGA-BH-A0C3 |
| TCGA-BRCA | Solid Tissue Normal | TCGA-BH-A0DD-11A-23R-A12O-13 | TCGA-BH-A0DD |
| TCGA-BRCA | Solid Tissue Normal | TCGA-BH-A0DG-11A-43R-A12O-13 | TCGA-BH-A0DG |
| TCGA-BRCA | Solid Tissue Normal | TCGA-BH-A0DK-11A-13R-A090-13 | TCGA-BH-A0DK |
| TCGA-BRCA | Solid Tissue Normal | TCGA-BH-A0DL-11A-13R-A114-13 | TCGA-BH-A0DL |
| TCGA-BRCA | Solid Tissue Normal | TCGA-BH-A0DO-11A-22R-A12C-13 | TCGA-BH-A0DO |
| TCGA-BRCA | Solid Tissue Normal | TCGA-BH-A0DP-11A-12R-A090-13 | TCGA-BH-A0DP |
| TCGA-BRCA | Solid Tissue Normal | TCGA-BH-A0DQ-11A-12R-A090-13 | TCGA-BH-A0DQ |
| TCGA-BRCA | Solid Tissue Normal | TCGA-BH-A0DT-11A-12R-A12C-13 | TCGA-BH-A0DT |
| TCGA-BRCA | Solid Tissue Normal | TCGA-BH-A0DV-11A-22R-A12O-13 | TCGA-BH-A0DV |
| TCGA-BRCA | Solid Tissue Normal | TCGA-BH-A0DZ-11A-22R-A090-13 | TCGA-BH-A0DZ |
| TCGA-BRCA | Solid Tissue Normal | TCGA-BH-A0E1-11A-13R-A090-13 | TCGA-BH-A0E1 |
| TCGA-BRCA | Solid Tissue Normal | TCGA-BH-A0H5-11A-62R-A114-13 | TCGA-BH-A0H5 |
| TCGA-BRCA | Solid Tissue Normal | TCGA-BH-A0H7-11A-13R-A090-13 | TCGA-BH-A0H7 |
| TCGA-BRCA | Solid Tissue Normal | TCGA-BH-A0HA-11A-31R-A12O-13 | TCGA-BH-A0HA |
| TCGA-BRCA | Solid Tissue Normal | TCGA-BH-A0HK-11A-11R-A090-13 | TCGA-BH-A0HK |
| TCGA-BRCA | Solid Tissue Normal | TCGA-BH-A18J-11A-31R-A12C-13 | TCGA-BH-A18J |
| TCGA-BRCA | Solid Tissue Normal | TCGA-BH-A18K-11A-13R-A12C-13 | TCGA-BH-A18K |
| TCGA-BRCA | Solid Tissue Normal | TCGA-BH-A18L-11A-42R-A12C-13 | TCGA-BH-A18L |
| TCGA-BRCA | Solid Tissue Normal | TCGA-BH-A18M-11A-33R-A12C-13 | TCGA-BH-A18M |
| TCGA-BRCA | Solid Tissue Normal | TCGA-BH-A18N-11A-43R-A12C-13 | TCGA-BH-A18N |
| TCGA-BRCA | Solid Tissue Normal | TCGA-BH-A18P-11A-43R-A12C-13 | TCGA-BH-A18P |
| TCGA-BRCA | Solid Tissue Normal | TCGA-BH-A18Q-11A-34R-A12C-13 | TCGA-BH-A18Q |
| TCGA-BRCA | Solid Tissue Normal | TCGA-BH-A18R-11A-42R-A12C-13 | TCGA-BH-A18R |
| TCGA-BRCA | Solid Tissue Normal | TCGA-BH-A18S-11A-43R-A12C-13 | TCGA-BH-A18S |

|           |                     |                              |              |
|-----------|---------------------|------------------------------|--------------|
| TCGA-BRCA | Solid Tissue Normal | TCGA-BH-A18U-11A-23R-A12C-13 | TCGA-BH-A18U |
| TCGA-BRCA | Solid Tissue Normal | TCGA-BH-A1EN-11A-23R-A13P-13 | TCGA-BH-A1EN |
| TCGA-BRCA | Solid Tissue Normal | TCGA-BH-A1EO-11A-31R-A136-13 | TCGA-BH-A1EO |
| TCGA-BRCA | Solid Tissue Normal | TCGA-BH-A1ET-11B-23R-A136-13 | TCGA-BH-A1ET |
| TCGA-BRCA | Solid Tissue Normal | TCGA-BH-A1EU-11A-23R-A136-13 | TCGA-BH-A1EU |
| TCGA-BRCA | Solid Tissue Normal | TCGA-BH-A1EV-11A-24R-A136-13 | TCGA-BH-A1EV |
| TCGA-BRCA | Solid Tissue Normal | TCGA-BH-A1EW-11B-33R-A136-13 | TCGA-BH-A1EW |
| TCGA-BRCA | Solid Tissue Normal | TCGA-BH-A1F0-11B-23R-A136-13 | TCGA-BH-A1F0 |
| TCGA-BRCA | Solid Tissue Normal | TCGA-BH-A1F2-11A-32R-A13P-13 | TCGA-BH-A1F2 |
| TCGA-BRCA | Solid Tissue Normal | TCGA-BH-A1F6-11B-94R-A13P-13 | TCGA-BH-A1F6 |
| TCGA-BRCA | Solid Tissue Normal | TCGA-BH-A1F8-11B-21R-A13P-13 | TCGA-BH-A1F8 |
| TCGA-BRCA | Solid Tissue Normal | TCGA-BH-A1FB-11A-33R-A13P-13 | TCGA-BH-A1FB |
| TCGA-BRCA | Solid Tissue Normal | TCGA-BH-A1FC-11A-32R-A13P-13 | TCGA-BH-A1FC |
| TCGA-BRCA | Solid Tissue Normal | TCGA-BH-A1FD-11B-21R-A13P-13 | TCGA-BH-A1FD |
| TCGA-BRCA | Solid Tissue Normal | TCGA-BH-A1FE-11B-14R-A13P-13 | TCGA-BH-A1FE |
| TCGA-BRCA | Solid Tissue Normal | TCGA-BH-A1FG-11B-12R-A13P-13 | TCGA-BH-A1FG |
| TCGA-BRCA | Solid Tissue Normal | TCGA-BH-A1FH-11B-42R-A13P-13 | TCGA-BH-A1FH |
| TCGA-BRCA | Solid Tissue Normal | TCGA-BH-A1FJ-11B-42R-A13P-13 | TCGA-BH-A1FJ |
| TCGA-BRCA | Solid Tissue Normal | TCGA-BH-A1FM-11B-23R-A13P-13 | TCGA-BH-A1FM |
| TCGA-BRCA | Solid Tissue Normal | TCGA-BH-A1FN-11A-34R-A13P-13 | TCGA-BH-A1FN |
| TCGA-BRCA | Solid Tissue Normal | TCGA-BH-A1FR-11B-42R-A13P-13 | TCGA-BH-A1FR |
| TCGA-BRCA | Solid Tissue Normal | TCGA-BH-A1FU-11A-23R-A14C-13 | TCGA-BH-A1FU |
| TCGA-BRCA | Solid Tissue Normal | TCGA-BH-A203-11A-42R-A168-13 | TCGA-BH-A203 |
| TCGA-BRCA | Solid Tissue Normal | TCGA-BH-A204-11A-53R-A156-13 | TCGA-BH-A204 |
| TCGA-BRCA | Solid Tissue Normal | TCGA-BH-A208-11A-51R-A156-13 | TCGA-BH-A208 |
| TCGA-BRCA | Solid Tissue Normal | TCGA-BH-A209-11A-42R-A156-13 | TCGA-BH-A209 |
| TCGA-BRCA | Solid Tissue Normal | TCGA-E2-A153-11A-31R-A12C-13 | TCGA-E2-A153 |
| TCGA-BRCA | Solid Tissue Normal | TCGA-E2-A158-11A-22R-A12C-13 | TCGA-E2-A158 |
| TCGA-BRCA | Solid Tissue Normal | TCGA-E2-A15I-11A-32R-A136-13 | TCGA-E2-A15I |
| TCGA-BRCA | Solid Tissue Normal | TCGA-E2-A15K-11A-13R-A12O-13 | TCGA-E2-A15K |
| TCGA-BRCA | Solid Tissue Normal | TCGA-E2-A15M-11A-22R-A12C-13 | TCGA-E2-A15M |
| TCGA-BRCA | Solid Tissue Normal | TCGA-E2-A1BC-11A-32R-A12O-13 | TCGA-E2-A1BC |
| TCGA-BRCA | Solid Tissue Normal | TCGA-E2-A1IG-11A-22R-A143-13 | TCGA-E2-A1IG |
| TCGA-BRCA | Solid Tissue Normal | TCGA-E2-A1L7-11A-33R-A143-13 | TCGA-E2-A1L7 |
| TCGA-BRCA | Solid Tissue Normal | TCGA-E2-A1LB-11A-22R-A143-13 | TCGA-E2-A1LB |
| TCGA-BRCA | Solid Tissue Normal | TCGA-E2-A1LH-11A-22R-A14C-13 | TCGA-E2-A1LH |
| TCGA-BRCA | Solid Tissue Normal | TCGA-E2-A1LS-11A-32R-A156-13 | TCGA-E2-A1LS |
| TCGA-BRCA | Solid Tissue Normal | TCGA-E9-A1N4-11A-33R-A14L-13 | TCGA-E9-A1N4 |
| TCGA-BRCA | Solid Tissue Normal | TCGA-E9-A1N5-11A-41R-A14C-13 | TCGA-E9-A1N5 |
| TCGA-BRCA | Solid Tissue Normal | TCGA-E9-A1N6-11A-32R-A143-13 | TCGA-E9-A1N6 |
| TCGA-BRCA | Solid Tissue Normal | TCGA-E9-A1N9-11A-71R-A14C-13 | TCGA-E9-A1N9 |
| TCGA-BRCA | Solid Tissue Normal | TCGA-E9-A1NA-11A-33R-A143-13 | TCGA-E9-A1NA |
| TCGA-BRCA | Solid Tissue Normal | TCGA-E9-A1ND-11A-43R-A143-13 | TCGA-E9-A1ND |
| TCGA-BRCA | Solid Tissue Normal | TCGA-E9-A1NF-11A-73R-A14C-13 | TCGA-E9-A1NF |
| TCGA-BRCA | Solid Tissue Normal | TCGA-E9-A1NG-11A-52R-A14L-13 | TCGA-E9-A1NG |
| TCGA-BRCA | Solid Tissue Normal | TCGA-E9-A1R7-11A-42R-A14L-13 | TCGA-E9-A1R7 |
| TCGA-BRCA | Solid Tissue Normal | TCGA-E9-A1RB-11A-33R-A156-13 | TCGA-E9-A1RB |
| TCGA-BRCA | Solid Tissue Normal | TCGA-E9-A1RC-11A-33R-A156-13 | TCGA-E9-A1RC |
| TCGA-BRCA | Solid Tissue Normal | TCGA-E9-A1RD-11A-33R-A156-13 | TCGA-E9-A1RD |
| TCGA-BRCA | Solid Tissue Normal | TCGA-E9-A1RF-11A-32R-A156-13 | TCGA-E9-A1RF |
| TCGA-BRCA | Solid Tissue Normal | TCGA-E9-A1RH-11A-34R-A168-13 | TCGA-E9-A1RH |
| TCGA-BRCA | Solid Tissue Normal | TCGA-E9-A1RI-11A-41R-A168-13 | TCGA-E9-A1RI |
| TCGA-BRCA | Solid Tissue Normal | TCGA-GI-A2C8-11A-22R-A16E-13 | TCGA-GI-A2C8 |
| TCGA-BRCA | Solid Tissue Normal | TCGA-GI-A2C9-11A-22R-A21U-13 | TCGA-GI-A2C9 |
| TCGA-UCEC | Solid Tissue Normal | TCGA-AJ-A2QL-11A-11R-A18L-13 | TCGA-AJ-A2QL |
| TCGA-UCEC | Solid Tissue Normal | TCGA-AJ-A3NC-11A-11R-A22I-13 | TCGA-AJ-A3NC |
| TCGA-UCEC | Solid Tissue Normal | TCGA-AJ-A3NE-11A-11R-A22I-13 | TCGA-AJ-A3NE |
| TCGA-UCEC | Solid Tissue Normal | TCGA-AJ-A3NH-11A-11R-A22I-13 | TCGA-AJ-A3NH |
| TCGA-UCEC | Solid Tissue Normal | TCGA-AX-A05Y-11A-11R-A27R-13 | TCGA-AX-A05Y |



|           |                     |                              |              |
|-----------|---------------------|------------------------------|--------------|
| TCGA-UCEC | Solid Tissue Normal | TCGA-AX-A0IZ-11A-11R-A27R-13 | TCGA-AX-A0IZ |
| TCGA-UCEC | Solid Tissue Normal | TCGA-AX-A0J0-11A-11R-A27R-13 | TCGA-AX-A0J0 |
| TCGA-UCEC | Solid Tissue Normal | TCGA-AX-A1CF-11A-11R-A136-13 | TCGA-AX-A1CF |
| TCGA-UCEC | Solid Tissue Normal | TCGA-AX-A1CI-11A-11R-A136-13 | TCGA-AX-A1CI |
| TCGA-UCEC | Solid Tissue Normal | TCGA-AX-A1CK-11A-11R-A136-13 | TCGA-AX-A1CK |
| TCGA-UCEC | Solid Tissue Normal | TCGA-AX-A2H8-11A-11R-A17A-13 | TCGA-AX-A2H8 |
| TCGA-UCEC | Solid Tissue Normal | TCGA-AX-A2HA-11A-11R-A18L-13 | TCGA-AX-A2HA |
| TCGA-UCEC | Solid Tissue Normal | TCGA-AX-A2HC-11A-11R-A17A-13 | TCGA-AX-A2HC |
| TCGA-UCEC | Solid Tissue Normal | TCGA-AX-A2HD-11A-11R-A17A-13 | TCGA-AX-A2HD |
| TCGA-UCEC | Solid Tissue Normal | TCGA-BG-A2AD-11A-11R-A16E-13 | TCGA-BG-A2AD |
| TCGA-UCEC | Solid Tissue Normal | TCGA-BG-A3EW-11A-22R-A22I-13 | TCGA-BG-A3EW |
| TCGA-UCEC | Solid Tissue Normal | TCGA-BG-A3PP-11A-11R-A22I-13 | TCGA-BG-A3PP |
| TCGA-UCEC | Solid Tissue Normal | TCGA-BK-A0CB-11A-33R-A103-13 | TCGA-BK-A0CB |
| TCGA-UCEC | Solid Tissue Normal | TCGA-BK-A4ZD-11A-12R-A27R-13 | TCGA-BK-A4ZD |
| TCGA-UCEC | Solid Tissue Normal | TCGA-DI-A2QU-11A-11R-A18L-13 | TCGA-DI-A2QU |
| TCGA-UCEC | Solid Tissue Normal | TCGA-DI-A2QY-11A-11R-A19V-13 | TCGA-DI-A2QY |
| TCGA-UCEC | Solid Tissue Normal | TCGA-E6-A1M0-11A-11R-A143-13 | TCGA-E6-A1M0 |
| TCGA-UCEC | Solid Tissue Normal | TCGA-FL-A1YF-11A-12R-A16E-13 | TCGA-FL-A1YF |
| TCGA-UCEC | Solid Tissue Normal | TCGA-FL-A1YG-11A-12R-A16E-13 | TCGA-FL-A1YG |
| TCGA-UCEC | Solid Tissue Normal | TCGA-FL-A1YH-11A-11R-A16E-13 | TCGA-FL-A1YH |
| TCGA-UCEC | Solid Tissue Normal | TCGA-FL-A1YI-11A-11R-A16E-13 | TCGA-FL-A1YI |
| TCGA-UCEC | Solid Tissue Normal | TCGA-FL-A1YL-11A-11R-A16E-13 | TCGA-FL-A1YL |
| TCGA-UCEC | Solid Tissue Normal | TCGA-FL-A1YM-11A-12R-A17A-13 | TCGA-FL-A1YM |
| TCGA-UCEC | Solid Tissue Normal | TCGA-FL-A1YN-11A-11R-A17A-13 | TCGA-FL-A1YN |
| TCGA-UCEC | Solid Tissue Normal | TCGA-FL-A1YQ-11A-11R-A17A-13 | TCGA-FL-A1YQ |
| TCGA-UCEC | Solid Tissue Normal | TCGA-FL-A1YT-11A-12R-A17A-13 | TCGA-FL-A1YT |
| TCGA-UCEC | Solid Tissue Normal | TCGA-FL-A1YU-11A-11R-A17A-13 | TCGA-FL-A1YU |
| TCGA-UCEC | Solid Tissue Normal | TCGA-FL-A3WE-11A-11R-A22I-13 | TCGA-FL-A3WE |

---

**Table S2:** Machine learning 205 ranked features

| <b>Rank model</b> | <b>miRNA ID</b> | <b>Importance weighting</b> |
|-------------------|-----------------|-----------------------------|
| 1                 | hsa-mir-183     | 100                         |
| 2                 | hsa-mir-139     | 93.87                       |
| 3                 | hsa-mir-145     | 89.75                       |
| 4                 | hsa-mir-10b     | 85.99                       |
| 5                 | hsa-mir-337     | 84.56                       |
| 6                 | hsa-mir-200c    | 83.26                       |
| 7                 | hsa-mir-200a    | 82.17                       |
| 8                 | hsa-mir-100     | 81.09                       |
| 9                 | hsa-mir-1247    | 80.4                        |
| 10                | hsa-mir-195     | 78.89                       |
| 11                | hsa-mir-379     | 77.99                       |
| 12                | hsa-mir-1301    | 77.47                       |
| 13                | hsa-mir-210     | 76.05                       |
| 14                | hsa-mir-200b    | 75.21                       |
| 15                | hsa-mir-381     | 75.13                       |
| 16                | hsa-mir-143     | 71.74                       |
| 17                | hsa-mir-1307    | 71.55                       |
| 18                | hsa-mir-130b    | 70.99                       |
| 19                | hsa-mir-144     | 70.38                       |
| 20                | hsa-mir-182     | 67.92                       |
| 21                | hsa-mir-204     | 64.77                       |
| 22                | hsa-mir-15b     | 63.56                       |
| 23                | hsa-mir-126     | 63.54                       |
| 24                | hsa-mir-3200    | 62.23                       |
| 25                | hsa-mir-154     | 60.62                       |
| 26                | hsa-mir-140     | 60.14                       |
| 27                | hsa-mir-3127    | 59.62                       |
| 28                | hsa-mir-191     | 58.79                       |
| 29                | hsa-mir-3615    | 57.73                       |
| 30                | hsa-mir-125b-1  | 57.64                       |
| 31                | hsa-mir-148b    | 57.11                       |
| 32                | hsa-mir-335     | 57.04                       |
| 33                | hsa-mir-125b-2  | 56.99                       |
| 34                | hsa-mir-141     | 55.47                       |
| 35                | hsa-let-7c      | 55.29                       |
| 36                | hsa-mir-3074    | 54.75                       |
| 37                | hsa-mir-345     | 54.57                       |
| 38                | hsa-mir-1266    | 53.11                       |
| 39                | hsa-mir-3614    | 53.08                       |
| 40                | hsa-mir-331     | 52.59                       |
| 41                | hsa-mir-1226    | 51.63                       |
| 42                | hsa-mir-369     | 51.54                       |
| 43                | hsa-mir-134     | 50.36                       |
| 44                | hsa-mir-155     | 50.25                       |
| 45                | hsa-mir-299     | 49.71                       |
| 46                | hsa-mir-152     | 49.22                       |
| 47                | hsa-mir-1976    | 49.08                       |
| 48                | hsa-mir-18a     | 48.79                       |
| 49                | hsa-mir-218-2   | 48.7                        |
| 50                | hsa-mir-378c    | 48.16                       |
| 51                | hsa-mir-101-2   | 47.74                       |
| 52                | hsa-mir-101-1   | 47.59                       |
| 53                | hsa-mir-218-1   | 47.47                       |
| 54                | hsa-mir-199b    | 46.53                       |
| 55                | hsa-mir-3170    | 46.3                        |
| 56                | hsa-mir-1271    | 45.96                       |
| 57                | hsa-mir-181b-1  | 45.65                       |

|     |                |       |
|-----|----------------|-------|
| 58  | hsa-mir-199a-1 | 45.39 |
| 59  | hsa-mir-136    | 45.19 |
| 60  | hsa-mir-26a-1  | 44.99 |
| 61  | hsa-mir-199a-2 | 44.99 |
| 62  | hsa-mir-29c    | 44.98 |
| 63  | hsa-mir-30a    | 44.93 |
| 64  | hsa-mir-26a-2  | 44.93 |
| 65  | hsa-mir-324    | 43.95 |
| 66  | hsa-mir-28     | 43.59 |
| 67  | hsa-mir-1180   | 43.52 |
| 68  | hsa-mir-181b-2 | 43.14 |
| 69  | hsa-mir-128-2  | 43.09 |
| 70  | hsa-mir-128-1  | 43.03 |
| 71  | hsa-mir-106b   | 43    |
| 72  | hsa-mir-1248   | 42.15 |
| 73  | hsa-mir-377    | 41.58 |
| 74  | hsa-mir-33b    | 41.43 |
| 75  | hsa-mir-203a   | 41.37 |
| 76  | hsa-mir-22     | 41.32 |
| 77  | hsa-mir-187    | 40.99 |
| 78  | hsa-mir-374b   | 40.09 |
| 79  | hsa-mir-217    | 39.86 |
| 80  | hsa-mir-365b   | 39.75 |
| 81  | hsa-mir-365a   | 39.67 |
| 82  | hsa-mir-382    | 39.51 |
| 83  | hsa-mir-190a   | 39.39 |
| 84  | hsa-mir-2355   | 38.07 |
| 85  | hsa-mir-130a   | 38.02 |
| 86  | hsa-mir-29a    | 37.41 |
| 87  | hsa-mir-30b    | 37.33 |
| 88  | hsa-mir-151b   | 37.11 |
| 89  | hsa-mir-3065   | 37.03 |
| 90  | hsa-mir-224    | 36.84 |
| 91  | hsa-mir-184    | 36.74 |
| 92  | hsa-mir-3917   | 36.36 |
| 93  | hsa-mir-330    | 35.29 |
| 94  | hsa-mir-107    | 35.27 |
| 95  | hsa-mir-342    | 35.16 |
| 96  | hsa-mir-219a-1 | 34.69 |
| 97  | hsa-let-7i     | 34.14 |
| 98  | hsa-mir-1306   | 34.06 |
| 99  | hsa-mir-370    | 33.8  |
| 100 | hsa-mir-203b   | 33.57 |
| 101 | hsa-mir-127    | 33.2  |
| 102 | hsa-mir-30e    | 33.02 |
| 103 | hsa-mir-1468   | 32.93 |
| 104 | hsa-mir-223    | 32.63 |
| 105 | hsa-mir-3677   | 32.59 |
| 106 | hsa-mir-320b-2 | 32.16 |
| 107 | hsa-mir-21     | 32.12 |
| 108 | hsa-mir-375    | 31.5  |
| 109 | hsa-mir-181a-1 | 31.39 |
| 110 | hsa-mir-26b    | 31.14 |
| 111 | hsa-let-7d     | 30.78 |
| 112 | hsa-mir-149    | 30.61 |
| 113 | hsa-mir-146b   | 29.65 |
| 114 | hsa-mir-326    | 29.11 |
| 115 | hsa-mir-188    | 28.77 |
| 116 | hsa-mir-181c   | 27.98 |

|     |                |       |
|-----|----------------|-------|
| 117 | hsa-mir-338    | 27.88 |
| 118 | hsa-mir-181a-2 | 27.36 |
| 119 | hsa-mir-106a   | 26.83 |
| 120 | hsa-mir-103a-2 | 26.25 |
| 121 | hsa-mir-103a-1 | 26.17 |
| 122 | hsa-mir-320b-1 | 25.94 |
| 123 | hsa-mir-2110   | 25.76 |
| 124 | hsa-mir-32     | 25.72 |
| 125 | hsa-mir-150    | 25.66 |
| 126 | hsa-mir-10a    | 25.65 |
| 127 | hsa-mir-192    | 25.08 |
| 128 | hsa-mir-378a   | 24.87 |
| 129 | hsa-mir-1270   | 24.3  |
| 130 | hsa-let-7f-1   | 24.18 |
| 131 | hsa-mir-197    | 24.13 |
| 132 | hsa-let-7f-2   | 23.82 |
| 133 | hsa-mir-135b   | 23.78 |
| 134 | hsa-mir-181d   | 23.04 |
| 135 | hsa-mir-374a   | 22.77 |
| 136 | hsa-mir-186    | 22.75 |
| 137 | hsa-mir-185    | 22.71 |
| 138 | hsa-mir-142    | 22.69 |
| 139 | hsa-mir-3613   | 22.57 |
| 140 | hsa-mir-339    | 21.55 |
| 141 | hsa-mir-301a   | 21.2  |
| 142 | hsa-mir-20b    | 20.78 |
| 143 | hsa-mir-17     | 20.74 |
| 144 | hsa-let-7e     | 19.75 |
| 145 | hsa-mir-3605   | 19.71 |
| 146 | hsa-mir-193b   | 19.4  |
| 147 | hsa-mir-33a    | 18.69 |
| 148 | hsa-mir-363    | 18.5  |
| 149 | hsa-mir-29b-2  | 17.78 |
| 150 | hsa-mir-29b-1  | 17.4  |
| 151 | hsa-mir-323a   | 16.94 |
| 152 | hsa-mir-323b   | 16.72 |
| 153 | hsa-mir-296    | 16.6  |
| 154 | hsa-mir-193a   | 16.39 |
| 155 | hsa-let-7b     | 16.35 |
| 156 | hsa-mir-205    | 15.28 |
| 157 | hsa-mir-25     | 15.11 |
| 158 | hsa-mir-19b-2  | 14.38 |
| 159 | hsa-mir-196b   | 13.9  |
| 160 | hsa-mir-15a    | 13.84 |
| 161 | hsa-mir-151a   | 13.22 |
| 162 | hsa-mir-328    | 13.21 |
| 163 | hsa-mir-16-2   | 12.96 |
| 164 | hsa-mir-19b-1  | 12.94 |
| 165 | hsa-mir-214    | 12.8  |
| 166 | hsa-mir-16-1   | 12.28 |
| 167 | hsa-mir-23b    | 11.02 |
| 168 | hsa-mir-125a   | 10.71 |
| 169 | hsa-mir-3653   | 10.33 |
| 170 | hsa-mir-340    | 10.32 |
| 171 | hsa-mir-30c-2  | 9.53  |
| 172 | hsa-mir-132    | 9.34  |
| 173 | hsa-mir-30c-1  | 9.29  |
| 174 | hsa-mir-3130-1 | 8.91  |
| 175 | hsa-mir-221    | 8.38  |

|     |                |      |
|-----|----------------|------|
| 176 | hsa-mir-194-2  | 8.11 |
| 177 | hsa-let-7a-2   | 7.96 |
| 178 | hsa-mir-222    | 7.9  |
| 179 | hsa-let-7a-1   | 7.81 |
| 180 | hsa-mir-146a   | 7.77 |
| 181 | hsa-let-7a-3   | 7.75 |
| 182 | hsa-mir-3130-2 | 7.19 |
| 183 | hsa-mir-1249   | 7.09 |
| 184 | hsa-mir-23a    | 6.9  |
| 185 | hsa-mir-34a    | 6.75 |
| 186 | hsa-mir-212    | 6.12 |
| 187 | hsa-mir-20a    | 5.14 |
| 188 | hsa-mir-196a-1 | 5.14 |
| 189 | hsa-mir-27a    | 4.64 |
| 190 | hsa-mir-361    | 3.88 |
| 191 | hsa-let-7g     | 3.62 |
| 192 | hsa-mir-320a   | 3.45 |
| 193 | hsa-mir-30d    | 3.29 |
| 194 | hsa-mir-24-2   | 2.81 |
| 195 | hsa-mir-31     | 2.75 |
| 196 | hsa-mir-24-1   | 2.36 |
| 197 | hsa-mir-194-1  | 2.3  |
| 198 | hsa-mir-27b    | 2.1  |
| 199 | hsa-mir-34c    | 1.63 |
| 200 | hsa-mir-34b    | 1.33 |
| 201 | hsa-mir-3607   | 1.17 |
| 202 | hsa-mir-148a   | 0.6  |
| 203 | hsa-mir-362    | 0.45 |
| 204 | hsa-mir-1287   | 0.43 |
| 205 | hsa-mir-1296   | 0.11 |

---

**Table S3: Comparison of SVM with other learning methods**

| Methods                                    | n° of Features | Accuracy | AUC   | Sensitivity | Specificity | F1 score |
|--------------------------------------------|----------------|----------|-------|-------------|-------------|----------|
| SVM <sup>a</sup>                           | 42             | 0.983    | 0.931 | 0.85        | 0.992       | 0.9      |
| Logistic Regression <sup>a</sup>           | 42             | 0.98     | 0.911 | 0.89        | 0.98        | 0.87     |
| Boosted Logistic Regression <sup>a</sup>   | 42             | 0.982    | 0.918 | 0.89        | 0.98        | 0.87     |
| Regression with LASSO penalty <sup>a</sup> | 42             | 0.975    | 0.92  | 0.83        | 0.984       | 0.85     |
| Elastic Net <sup>a</sup>                   | 42             | 0.979    | 0.922 | 0.85        | 0.987       | 0.87     |
| Random Forest                              | 42             | 0.99     | 0.97  | 0.92        | 0.99        | 0.93     |
| avNNet                                     | 42             | 0.98     | 0.93  | 0.97        | 0.99        | 0.91     |
| nnet                                       | 42             | 0.98     | 0.93  | 0.92        | 0.99        | 0.9      |

<sup>a</sup> Intersection of all feat. selected (205) with ERBB target (28 + 15 top importance, 1 in common)

<sup>a</sup> Intersection of all feat. selected (205) with ERBB target (28 + 15 top importance, 1 in common)

**Table S4:** miRTarBase, 158 miRNAs targeting ERBB isoforms

| miRTarBase ID | miRNA           | Target Gene | Experiments                                                                  | Support Type   | References (PMID) |
|---------------|-----------------|-------------|------------------------------------------------------------------------------|----------------|-------------------|
| MIRT000036    | hsa-miR-559     | ERBB2       | Luciferase reporter assay//Reporter assay;Other                              | Functional MTI | 19486885          |
| MIRT000037    | hsa-miR-548d-3p | ERBB2       | Luciferase reporter assay//Reporter assay;Other                              | Functional MTI | 19486885          |
| MIRT002938    | hsa-miR-125b-5p | ERBB3       | Luciferase reporter assay//Northern blot//qRT-PCR//Western blot              | Functional MTI | 17110380          |
| MIRT002938    | hsa-miR-125b-5p | ERBB3       | Immunoblot//Immunohistochemistry//Luciferase reporter assay//qRT-PCR         | Functional MTI | 23146892          |
| MIRT002938    | hsa-miR-125b-5p | ERBB3       | Western blot//qRT-PCR                                                        | Functional MTI | 23519125          |
| MIRT002939    | hsa-miR-125b-5p | ERBB2       | Western blot                                                                 | Functional MTI | 19825990          |
| MIRT002939    | hsa-miR-125b-5p | ERBB2       | Luciferase reporter assay//Northern blot//qRT-PCR//Western blot              | Functional MTI | 17110380          |
| MIRT002939    | hsa-miR-125b-5p | ERBB2       | Luciferase reporter assay//Microarray//Western blot                          | Functional MTI | 20864407          |
| MIRT002939    | hsa-miR-125b-5p | ERBB2       | Luciferase reporter assay//Western blot                                      | Functional MTI | 22460089          |
| MIRT002939    | hsa-miR-125b-5p | ERBB2       | qRT-PCR//Luciferase reporter assay//Immunoblot//Western blot                 | Functional MTI | 25388283          |
| MIRT002939    | hsa-miR-125b-5p | ERBB2       | Luciferase reporter assay//Western blot                                      | Functional MTI | 26966351          |
| MIRT002939    | hsa-miR-125b-5p | ERBB2       | Luciferase reporter assay                                                    | Functional MTI | 26544868          |
| MIRT002939    | hsa-miR-125b-5p | ERBB2       | Luciferase reporter assay//qRT-PCR//Western blot                             | Functional MTI | 25833836          |
| MIRT003532    | hsa-miR-372-3p  | ERBB4       | Luciferase reporter assay//Microarray                                        | Functional MTI | 19885849          |
| MIRT003533    | hsa-miR-19a-3p  | ERBB4       | Luciferase reporter assay//Microarray                                        | Functional MTI | 19885849          |
| MIRT003534    | hsa-miR-302d-3p | ERBB4       | Luciferase reporter assay//Microarray                                        | Functional MTI | 19885849          |
| MIRT003659    | hsa-miR-205-5p  | ERBB3       | Luciferase reporter assay//Reporter assay;Other                              | Functional MTI | 19238171          |
| MIRT003659    | hsa-miR-205-5p  | ERBB3       | Luciferase reporter assay                                                    | Functional MTI | 20065103          |
| MIRT003659    | hsa-miR-205-5p  | ERBB3       | Luciferase reporter assay//qRT-PCR//Western blot                             | Functional MTI | 19276373          |
| MIRT003659    | hsa-miR-205-5p  | ERBB3       | Luciferase reporter assay//Microarray//Western blot                          | Functional MTI | 20864407          |
| MIRT003659    | hsa-miR-205-5p  | ERBB3       | Western blot//qRT-PCR                                                        | Functional MTI | 23519125          |
| MIRT004318    | hsa-miR-21-5p   | ERBB2       | qRT-PCR//Western blot                                                        | Functional MTI | 19419954          |
| MIRT005117    | hsa-miR-125a-5p | ERBB3       | Luciferase reporter assay//Northern blot//qRT-PCR//Western blot              | Functional MTI | 17110380          |
| MIRT005117    | hsa-miR-125a-5p | ERBB3       | Luciferase reporter assay//Microarray//Western blot                          | Functional MTI | 20864407          |
| MIRT005117    | hsa-miR-125a-5p | ERBB3       | Western blot//qRT-PCR                                                        | Functional MTI | 23519125          |
| MIRT005118    | hsa-miR-125a-5p | ERBB2       | Luciferase reporter assay//Northern blot//qRT-PCR//Western blot              | Functional MTI | 17110380          |
| MIRT005118    | hsa-miR-125a-5p | ERBB2       | Luciferase reporter assay                                                    | Functional MTI | 21220473          |
| MIRT005118    | hsa-miR-125a-5p | ERBB2       | Western blot//qRT-PCR                                                        | Functional MTI | 23519125          |
| MIRT005118    | hsa-miR-125a-5p | ERBB2       | Luciferase reporter assay//qRT-PCR//Western blot                             | Functional MTI | 25833836          |
| MIRT005805    | hsa-miR-331-3p  | ERBB2       | Luciferase reporter assay//Microarray//Western blot                          | Functional MTI | 20864407          |
| MIRT005805    | hsa-miR-331-3p  | ERBB2       | Flow//Immunohistochemistry//Luciferase reporter assay//qRT-PCR//Western blot | Functional MTI | 24775712          |
| MIRT005805    | hsa-miR-331-3p  | ERBB2       | Luciferase reporter assay                                                    | Functional MTI | 24148764          |
| MIRT005805    | hsa-miR-331-3p  | ERBB2       | Luciferase reporter assay//Western blot                                      | Functional MTI | 26718987          |
| MIRT005806    | hsa-miR-146a-5p | ERBB4       | Luciferase reporter assay//Microarray//Western blot                          | Functional MTI | 20864407          |
| MIRT005806    | hsa-miR-146a-5p | ERBB4       | Luciferase reporter assay//Northern blot                                     | Functional MTI | 23619365          |
| MIRT006210    | hsa-miR-22-3p   | ERBB3       | Luciferase reporter assay//qRT-PCR//Western blot                             | Functional MTI | 22484852          |
| MIRT006982    | hsa-miR-205-5p  | ERBB2       | qRT-PCR//Western blot                                                        | Functional MTI | 21787752          |

|            |                 |       |                                                                      |                       |          |
|------------|-----------------|-------|----------------------------------------------------------------------|-----------------------|----------|
| MIRT006982 | hsa-miR-205-5p  | ERBB2 | Luciferase reporter assay//qRT-PCR//Western blot                     | Functional MTI        | 26181203 |
| MIRT007152 | hsa-miR-199b-5p | ERBB2 | Luciferase reporter assay//qRT-PCR//Western blot                     | Functional MTI        | 23296799 |
| MIRT007265 | hsa-miR-199a-5p | ERBB2 | Western blot                                                         | Functional MTI        | 23437196 |
| MIRT007265 | hsa-miR-199a-5p | ERBB2 | Immunoblot//Immunohistochemistry//Luciferase reporter assay//qRT-PCR | Functional MTI        | 23146892 |
| MIRT023179 | hsa-miR-124-3p  | ERBB2 | Microarray                                                           | Functional MTI (Weak) | 18668037 |
| MIRT030589 | hsa-miR-24-3p   | ERBB3 | Microarray                                                           | Functional MTI (Weak) | 19748357 |
| MIRT030589 | hsa-miR-24-3p   | ERBB3 | HITS-CLIP                                                            | Functional MTI (Weak) | 23824327 |
| MIRT043637 | hsa-miR-326     | ERBB2 | CLASH                                                                | Functional MTI (Weak) | 23622248 |
| MIRT053607 | hsa-miR-199a-5p | ERBB3 | Immunoblot//Immunohistochemistry//Luciferase reporter assay//qRT-PCR | Functional MTI        | 23146892 |
| MIRT053647 | hsa-miR-143-3p  | ERBB3 | Microarray                                                           | Functional MTI (Weak) | 22942087 |
| MIRT053661 | hsa-miR-145-5p  | ERBB4 | Microarray                                                           | Functional MTI (Weak) | 22942087 |
| MIRT053704 | hsa-miR-221-3p  | ERBB4 | Microarray                                                           | Functional MTI (Weak) | 22942087 |
| MIRT053780 | hsa-miR-375     | ERBB2 | Luciferase reporter assay//qRT-PCR//Western blot                     | Functional MTI        | 24926380 |
| MIRT053780 | hsa-miR-375     | ERBB2 | HITS-CLIP                                                            | Functional MTI (Weak) | 24906430 |
| MIRT053780 | hsa-miR-375     | ERBB2 | Flow//qRT-PCR//Western blot                                          | Functional MTI        | 26893657 |
| MIRT054130 | hsa-miR-25-3p   | ERBB2 | Luciferase reporter assay//qRT-PCR//Western blot                     | Functional MTI        | 25043310 |
| MIRT054800 | hsa-miR-302b-3p | ERBB4 | Luciferase reporter assay//qRT-PCR//Western blot                     | Functional MTI        | 24438167 |
| MIRT065956 | hsa-miR-33a-3p  | ERBB3 | PAR-CLIP                                                             | Functional MTI (Weak) | 22012620 |
| MIRT065961 | hsa-miR-592     | ERBB3 | PAR-CLIP                                                             | Functional MTI (Weak) | 22012620 |
| MIRT065963 | hsa-miR-2113    | ERBB3 | PAR-CLIP                                                             | Functional MTI (Weak) | 22012620 |
| MIRT065968 | hsa-miR-4698    | ERBB3 | PAR-CLIP                                                             | Functional MTI (Weak) | 22012620 |
| MIRT065971 | hsa-miR-6507-5p | ERBB3 | PAR-CLIP                                                             | Functional MTI (Weak) | 22012620 |
| MIRT076987 | hsa-miR-670-3p  | ERBB2 | HITS-CLIP                                                            | Functional MTI (Weak) | 24906430 |
| MIRT076993 | hsa-miR-4326    | ERBB2 | HITS-CLIP                                                            | Functional MTI (Weak) | 24906430 |
| MIRT438501 | hsa-miR-552-3p  | ERBB2 | Luciferase reporter assay                                            | Functional MTI        | 24148764 |
| MIRT438502 | hsa-miR-541-3p  | ERBB2 | Luciferase reporter assay                                            | Functional MTI        | 24148764 |
| MIRT438503 | hsa-miR-498     | ERBB2 | Luciferase reporter assay                                            | Functional MTI        | 24148764 |
| MIRT438504 | hsa-miR-323b-5p | ERBB2 | Luciferase reporter assay                                            | Functional MTI        | 24148764 |
| MIRT438505 | hsa-miR-193a-5p | ERBB2 | Luciferase reporter assay                                            | Functional MTI        | 24148764 |
| MIRT438505 | hsa-miR-193a-5p | ERBB2 | Luciferase reporter assay                                            | Functional MTI        | 27203740 |
| MIRT438506 | hsa-miR-193a-3p | ERBB2 | Luciferase reporter assay                                            | Functional MTI        | 24148764 |
| MIRT438507 | hsa-miR-134-5p  | ERBB2 | Luciferase reporter assay                                            | Functional MTI        | 24148764 |
| MIRT537654 | hsa-miR-597-5p  | ERBB3 | PAR-CLIP                                                             | Functional MTI (Weak) | 22012620 |
| MIRT537655 | hsa-miR-8063    | ERBB3 | PAR-CLIP                                                             | Functional MTI (Weak) | 22012620 |
| MIRT537656 | hsa-miR-7109-3p | ERBB3 | PAR-CLIP                                                             | Functional MTI (Weak) | 22012620 |
| MIRT537657 | hsa-miR-548e-5p | ERBB3 | PAR-CLIP                                                             | Functional MTI (Weak) | 22012620 |
| MIRT608163 | hsa-miR-6739-3p | ERBB2 | HITS-CLIP                                                            | Functional MTI (Weak) | 24906430 |
| MIRT608164 | hsa-miR-4677-5p | ERBB2 | HITS-CLIP                                                            | Functional MTI (Weak) | 24906430 |
| MIRT608165 | hsa-miR-7156-5p | ERBB2 | HITS-CLIP                                                            | Functional MTI (Weak) | 24906430 |



|            |                 |       |           |                       |          |
|------------|-----------------|-------|-----------|-----------------------|----------|
| MIRT608166 | hsa-miR-4273    | ERBB2 | HITS-CLIP | Functional MTI (Weak) | 24906430 |
| MIRT608167 | hsa-miR-7109-5p | ERBB2 | HITS-CLIP | Functional MTI (Weak) | 24906430 |
| MIRT608168 | hsa-miR-4790-5p | ERBB2 | HITS-CLIP | Functional MTI (Weak) | 24906430 |
| MIRT608169 | hsa-miR-6868-3p | ERBB2 | HITS-CLIP | Functional MTI (Weak) | 24906430 |
| MIRT608170 | hsa-miR-3127-5p | ERBB2 | HITS-CLIP | Functional MTI (Weak) | 24906430 |
| MIRT608171 | hsa-miR-22-5p   | ERBB2 | HITS-CLIP | Functional MTI (Weak) | 24906430 |
| MIRT608172 | hsa-miR-2116-5p | ERBB2 | HITS-CLIP | Functional MTI (Weak) | 24906430 |
| MIRT608173 | hsa-miR-593-3p  | ERBB2 | HITS-CLIP | Functional MTI (Weak) | 24906430 |
| MIRT608174 | hsa-miR-6885-5p | ERBB2 | HITS-CLIP | Functional MTI (Weak) | 24906430 |
| MIRT608175 | hsa-miR-328-5p  | ERBB2 | HITS-CLIP | Functional MTI (Weak) | 24906430 |
| MIRT608176 | hsa-miR-6887-5p | ERBB2 | HITS-CLIP | Functional MTI (Weak) | 24906430 |
| MIRT608177 | hsa-miR-486-3p  | ERBB2 | HITS-CLIP | Functional MTI (Weak) | 24906430 |
| MIRT608178 | hsa-miR-6795-5p | ERBB2 | HITS-CLIP | Functional MTI (Weak) | 24906430 |
| MIRT608179 | hsa-miR-3140-3p | ERBB2 | HITS-CLIP | Functional MTI (Weak) | 24906430 |
| MIRT608180 | hsa-miR-3116    | ERBB2 | HITS-CLIP | Functional MTI (Weak) | 24906430 |
| MIRT608181 | hsa-miR-1254    | ERBB2 | HITS-CLIP | Functional MTI (Weak) | 24906430 |
| MIRT608182 | hsa-miR-4790-3p | ERBB2 | HITS-CLIP | Functional MTI (Weak) | 24906430 |
| MIRT608183 | hsa-miR-6730-3p | ERBB2 | HITS-CLIP | Functional MTI (Weak) | 24906430 |
| MIRT608184 | hsa-miR-4680-3p | ERBB2 | HITS-CLIP | Functional MTI (Weak) | 24906430 |
| MIRT608185 | hsa-miR-5187-3p | ERBB2 | HITS-CLIP | Functional MTI (Weak) | 24906430 |
| MIRT608186 | hsa-miR-4427    | ERBB2 | HITS-CLIP | Functional MTI (Weak) | 24906430 |
| MIRT608187 | hsa-miR-4653-5p | ERBB2 | HITS-CLIP | Functional MTI (Weak) | 24906430 |
| MIRT608188 | hsa-miR-3921    | ERBB2 | HITS-CLIP | Functional MTI (Weak) | 24906430 |
| MIRT608189 | hsa-miR-301b-5p | ERBB2 | HITS-CLIP | Functional MTI (Weak) | 24906430 |
| MIRT608190 | hsa-miR-301a-5p | ERBB2 | HITS-CLIP | Functional MTI (Weak) | 24906430 |
| MIRT608191 | hsa-miR-4315    | ERBB2 | HITS-CLIP | Functional MTI (Weak) | 24906430 |
| MIRT608192 | hsa-miR-146a-3p | ERBB2 | HITS-CLIP | Functional MTI (Weak) | 24906430 |
| MIRT608193 | hsa-miR-3667-3p | ERBB2 | HITS-CLIP | Functional MTI (Weak) | 24906430 |
| MIRT608194 | hsa-miR-6734-3p | ERBB2 | HITS-CLIP | Functional MTI (Weak) | 24906430 |
| MIRT608195 | hsa-miR-6891-3p | ERBB2 | HITS-CLIP | Functional MTI (Weak) | 24906430 |
| MIRT608196 | hsa-miR-6072    | ERBB2 | HITS-CLIP | Functional MTI (Weak) | 24906430 |
| MIRT608197 | hsa-miR-6754-5p | ERBB2 | HITS-CLIP | Functional MTI (Weak) | 24906430 |
| MIRT608198 | hsa-miR-4441    | ERBB2 | HITS-CLIP | Functional MTI (Weak) | 24906430 |
| MIRT608199 | hsa-miR-4270    | ERBB2 | HITS-CLIP | Functional MTI (Weak) | 24906430 |
| MIRT608200 | hsa-miR-211-3p  | ERBB2 | HITS-CLIP | Functional MTI (Weak) | 24906430 |
| MIRT608201 | hsa-miR-4748    | ERBB2 | HITS-CLIP | Functional MTI (Weak) | 24906430 |
| MIRT608202 | hsa-miR-329-5p  | ERBB2 | HITS-CLIP | Functional MTI (Weak) | 24906430 |
| MIRT608203 | hsa-miR-4464    | ERBB2 | HITS-CLIP | Functional MTI (Weak) | 24906430 |
| MIRT608204 | hsa-miR-7845-5p | ERBB2 | HITS-CLIP | Functional MTI (Weak) | 24906430 |

|            |                   |       |                                                  |                       |          |
|------------|-------------------|-------|--------------------------------------------------|-----------------------|----------|
| MIRT608205 | hsa-miR-888-3p    | ERBB2 | HITS-CLIP                                        | Functional MTI (Weak) | 24906430 |
| MIRT608206 | hsa-miR-4506      | ERBB2 | HITS-CLIP                                        | Functional MTI (Weak) | 24906430 |
| MIRT615956 | hsa-miR-4446-5p   | ERBB3 | HITS-CLIP                                        | Functional MTI (Weak) | 23824327 |
| MIRT615956 | hsa-miR-4446-5p   | ERBB3 | HITS-CLIP                                        | Functional MTI (Weak) | 19536157 |
| MIRT615957 | hsa-miR-3679-3p   | ERBB3 | HITS-CLIP                                        | Functional MTI (Weak) | 23824327 |
| MIRT615957 | hsa-miR-3679-3p   | ERBB3 | HITS-CLIP                                        | Functional MTI (Weak) | 19536157 |
| MIRT615958 | hsa-miR-6826-3p   | ERBB3 | HITS-CLIP                                        | Functional MTI (Weak) | 23824327 |
| MIRT615958 | hsa-miR-6826-3p   | ERBB3 | HITS-CLIP                                        | Functional MTI (Weak) | 19536157 |
| MIRT615959 | hsa-miR-4732-5p   | ERBB3 | HITS-CLIP                                        | Functional MTI (Weak) | 23824327 |
| MIRT615959 | hsa-miR-4732-5p   | ERBB3 | HITS-CLIP                                        | Functional MTI (Weak) | 19536157 |
| MIRT615960 | hsa-miR-6832-5p   | ERBB3 | HITS-CLIP                                        | Functional MTI (Weak) | 23824327 |
| MIRT615960 | hsa-miR-6832-5p   | ERBB3 | HITS-CLIP                                        | Functional MTI (Weak) | 19536157 |
| MIRT615961 | hsa-miR-331-3p    | ERBB3 | HITS-CLIP                                        | Functional MTI (Weak) | 23824327 |
| MIRT615961 | hsa-miR-331-3p    | ERBB3 | HITS-CLIP                                        | Functional MTI (Weak) | 19536157 |
| MIRT615962 | hsa-miR-6810-3p   | ERBB3 | HITS-CLIP                                        | Functional MTI (Weak) | 23824327 |
| MIRT615962 | hsa-miR-6810-3p   | ERBB3 | HITS-CLIP                                        | Functional MTI (Weak) | 19536157 |
| MIRT615963 | hsa-miR-6801-3p   | ERBB3 | HITS-CLIP                                        | Functional MTI (Weak) | 23824327 |
| MIRT615963 | hsa-miR-6801-3p   | ERBB3 | HITS-CLIP                                        | Functional MTI (Weak) | 19536157 |
| MIRT630919 | hsa-miR-4328      | ERBB3 | HITS-CLIP                                        | Functional MTI (Weak) | 23824327 |
| MIRT719394 | hsa-miR-301a-5p   | ERBB3 | HITS-CLIP                                        | Functional MTI (Weak) | 19536157 |
| MIRT719395 | hsa-miR-5701      | ERBB3 | HITS-CLIP                                        | Functional MTI (Weak) | 19536157 |
| MIRT719396 | hsa-miR-323b-3p   | ERBB3 | HITS-CLIP                                        | Functional MTI (Weak) | 19536157 |
| MIRT732771 | hsa-miR-34a-5p    | ERBB2 | Luciferase reporter assay//Western blot          | Functional MTI        | 27813227 |
| MIRT733558 | hsa-miR-155-3p    | ERBB2 | Luciferase reporter assay//qRT-PCR//Western blot | Functional MTI        | 27065318 |
| MIRT733635 | hsa-miR-130b-3p   | ERBB2 | Luciferase reporter assay                        | Functional MTI        | 26316103 |
| MIRT733746 | hsa-miR-1296-5p   | ERBB2 | Luciferase reporter assay//qRT-PCR//Western blot | Functional MTI        | 28099468 |
| MIRT733749 | hsa-miR-133a-3p   | ERBB2 | Luciferase reporter assay//qRT-PCR//Western blot | Functional MTI        | 28109082 |
| MIRT733913 | hsa-miR-219a-2-3p | ERBB3 | qRT-PCR                                          | Functional MTI (Weak) | 26043902 |
| MIRT734059 | hsa-miR-193a-3p   | ERBB4 | Luciferase reporter assay//qRT-PCR//Western blot | Functional MTI        | 24469061 |
| MIRT734069 | hsa-miR-3622b-5p  | ERBB2 | Luciferase reporter assay//qRT-PCR//Western blot | Functional MTI        | 28160563 |
| MIRT734579 | hsa-miR-22-3p     | ERBB2 | Luciferase reporter assay                        | Functional MTI        | 26544868 |
| MIRT734641 | hsa-miR-143-5p    | ERBB3 | Luciferase reporter assay//qRT-PCR//Western blot | Functional MTI        | 25248370 |
| MIRT735021 | hsa-miR-146b-5p   | ERBB4 | Luciferase reporter assay                        | Functional MTI        | 27400799 |
| MIRT783296 | hsa-miR-1273f     | ERBB3 | HITS-CLIP                                        | Functional MTI (Weak) | 27418678 |
| MIRT783358 | hsa-miR-1276      | ERBB3 | HITS-CLIP                                        | Functional MTI (Weak) | 27418678 |
| MIRT785707 | hsa-miR-4311      | ERBB3 | HITS-CLIP                                        | Functional MTI (Weak) | 27418678 |
| MIRT787937 | hsa-miR-583       | ERBB3 | HITS-CLIP                                        | Functional MTI (Weak) | 27418678 |
| MIRT788557 | hsa-miR-6751-5p   | ERBB3 | HITS-CLIP                                        | Functional MTI (Weak) | 27418678 |
| MIRT788561 | hsa-miR-6752-5p   | ERBB3 | HITS-CLIP                                        | Functional MTI (Weak) | 27418678 |

|            |                 |       |           |                       |          |
|------------|-----------------|-------|-----------|-----------------------|----------|
| MIRT788821 | hsa-miR-6803-5p | ERBB3 | HITS-CLIP | Functional MTI (Weak) | 27418678 |
| MIRT789021 | hsa-miR-6835-5p | ERBB3 | HITS-CLIP | Functional MTI (Weak) | 27418678 |
| MIRT789043 | hsa-miR-6842-5p | ERBB3 | HITS-CLIP | Functional MTI (Weak) | 27418678 |
| MIRT789412 | hsa-miR-7110-5p | ERBB3 | HITS-CLIP | Functional MTI (Weak) | 27418678 |

---

**Table S5:** Model Performance different combinations

| <b>Model candidates</b>                                                                                      | <b>n° of Features</b> | <b>Accuracy</b> | <b>AUC</b>   | <b>Sensitivity</b> | <b>Specificity</b> |
|--------------------------------------------------------------------------------------------------------------|-----------------------|-----------------|--------------|--------------------|--------------------|
| All features from Feature Selection                                                                          | 205                   | 0.968           | 0.926        | 0.55               | 0.995              |
| Only ERBBA target (158) available in TCGA dataset                                                            | 32                    | 0.983           | 0.91         | 0.9                | 0.98               |
| Intersection of all feat. selected (205) with ERBB target (158)                                              | 28                    | 0.977           | 0.88         | 0.875              | 0.984              |
| Intersection of all feat. selected (205) with ERBB target (28 + 10 top importance, 1 in common)              | 37                    | 0.982           | 0.912        | 0.875              | 0.988              |
| <b>Intersection of all feat. selected (205) with ERBB target (28 + 15 top importance, 1 in common)</b>       | <b>42</b>             | <b>0.983</b>    | <b>0.931</b> | <b>0.85</b>        | <b>0.992</b>       |
| Intersection of all feat. selected (205) with ERBB target (28 + 15 top importance, 1 in common) <sup>a</sup> | 42                    | 0.976           | 0.92         | 0.7                | 0.99               |
| Intersection of all feat. selected (205) with ERBB target (28 + 20 top importance, 3 in common)              | 45                    | 0.983           | 0.931        | 0.85               | 0.992              |
| Intersection of all feat. selected (205) with ERBB target (28 + 25 top importance, 3 in common)              | 50                    | 0.979           | 0.914        | 0.8                | 0.99               |
| Intersection of all feat. selected (205) with ERBB target (28 + 30 top importance, 5 in common)              | 53                    | 0.98            | 0.926        | 0.8                | 0.992              |
| Top 10 Importance                                                                                            | 10                    | 0.962           | 0.8          | 1                  | 0.96               |
| Top 15 importance                                                                                            | 15                    | 0.97            | 0.835        | 0.975              | 0.969              |
| Top 20 importance                                                                                            | 20                    | 0.971           | 0.843        | 0.95               | 0.972              |
| Top 25 importance                                                                                            | 25                    | 0.973           | 0.853        | 0.925              | 0.976              |
| Top 30 importance                                                                                            | 30                    | 0.976           | 0.867        | 0.925              | 0.979              |
| All features from Feature Selection                                                                          |                       |                 |              |                    |                    |
| a WITHOUT ARTIFICIAL SAMPLES                                                                                 |                       |                 |              |                    |                    |

**Table S6: Comprehensive analyses on multiple databases retrieved the predominantly expressed miRNA mature sequences for *in vitro* validations.** The Cancer Genome Atlas (TCGA) breast, ovarian and uterine corpus endometrial cancer, Cancer cell line Encyclopaedia (CCLE) and Human miRNA-Disease Database (HMDD) (v.3.0) annotations for 14 semantic entries associated with breast, ovarian and endometrial cancers.

| Accession | miRNA        | miRNA isoform reported in databases | <i>In vitro</i> validated mature miRNA |
|-----------|--------------|-------------------------------------|----------------------------------------|
| MI0006382 | hsa-mir-1247 | not specified                       | hsa-miR-1247-5p<br>hsa-miR-1247-3p     |
| MI0003815 | hsa-mir-1301 | TCGA                                | hsa-miR-1301-3p                        |
| MI0000789 | hsa-mir-381  | TCGA and HMDD                       | hsa-miR-381-3p                         |
| MI0000812 | hsa-mir-331  | not specified                       | hsa-miR-331-5p<br>hsa-miR-331-3p       |
| MI0003129 | hsa-mir-146b | not specified                       | hsa-miR-146b-5p<br>hsa-miR-146b-3p     |
| MI0000091 | hsa-mir-33a  | TCGA and HMDD                       | hsa-miR-33a-3p                         |
| MI0000487 | hsa-mir-193a | not specified                       | hsa-miR-193a-5p<br>hsa-miR-193a-3p     |
| MI0003780 | hsa-mir-1296 | TCGA                                | hsa-miR-1296-5p                        |
| MI0014206 | hsa-mir-323b | TCGA and CCLE                       | hsa-miR-323b-3p<br>hsa-miR-323a-3p     |
